# Supplementary material for: Sociodemographic differences in women’s experience of early labour care: a mixed methods study
Source: PubMed Central journal article supplement — BMJ Open. 2017 Jul 13;7(7):e016351. doi: 10.1136/bmjopen-2017-016351 (PMC5541638; doi:10.1136/bmjopen-2017-016351), 2017-07-13
Supplement: bmjopen-2017-016351.draft_revisions.pdf [file bmjopen-2017-016351.draft_revisions.pdf]

# BMJ Open

BMJ Open is committed to open peer review. As part of this commitment we make the peer review history of every article we publish publicly available.

When an article is published we post the peer reviewers' comments and the authors' responses online. We also post the versions of the paper that were used during peer review. These are the versions that the peer review comments apply to.

The versions of the paper that follow are the versions that were submitted during the peer review process. They are not the versions of record or the final published versions. They should not be cited or distributed as the published version of this manuscript.

BMJ Open is an open access journal and the full, final, typeset and author-corrected version of record of the manuscript is available on our site with no access controls, subscription charges or pay-per-view fees (<http://bmjopen.bmj.com>).

If you have any questions on BMJ Open's open peer review process please email [editorial.bmjopen@bmj.com](mailto:editorial.bmjopen@bmj.com)

# BMJ Open

## Women's experience of early labour care: a mixed methods study

|                                 |                                                                                                                           |
|---------------------------------|---------------------------------------------------------------------------------------------------------------------------|
| Journal:                        | <i>BMJ Open</i>                                                                                                           |
| Manuscript ID                   | bmjopen-2017-016351                                                                                                       |
| Article Type:                   | Research                                                                                                                  |
| Date Submitted by the Author:   | 10-Feb-2017                                                                                                               |
| Complete List of Authors:       | Henderson, Jane; NPEU, Nuffield Department of Population Health<br>Redshaw, Maggie; NPEU, Department of Population Health |
| <b>Primary Subject Heading</b>: | Obstetrics and gynaecology                                                                                                |
| Secondary Subject Heading:      | Epidemiology                                                                                                              |
| Keywords:                       | OBSTETRICS, Maternal medicine < OBSTETRICS, EPIDEMIOLOGY                                                                  |
|                                 |                                                                                                                           |

SCHOLARONE™  
Manuscripts

Peer Review Only

## Women's experience of early labour care: a mixed methods study

Jane Henderson BSc(Hons) MSc PhD\*

Maggie Redshaw BA PhD CPsychol

Policy Research Unit in Maternal Health and Care,

National Perinatal Epidemiology Unit,

Nuffield Department of Population Health,

University of Oxford,

Old Road Campus,

Old Road,

Oxford, UK

\* Corresponding author

Tel: 01865 289758; Fax: 01865 289701

Email: [jane.henderson@npeu.ox.ac.uk](mailto:jane.henderson@npeu.ox.ac.uk)

Email: [maggie.redshaw@npeu.ox.ac.uk](mailto:maggie.redshaw@npeu.ox.ac.uk)

Word count: 5152

## Abstract

Objectives: To explore women's experiences of early labour care focussing on differences between sociodemographic groups, and to examine the effect of antenatal education on women's experience of early labour.

Setting: England, 2014.

Participants: Women who completed postal questionnaires asking about their experience of maternity care including questions about antenatal education, early labour and sociodemographic factors.

Primary and secondary outcome measures: Worries about labour, contact with midwives in early labour and subsequent care. Free-text comments.

Results: Completed questionnaires were received from 4571 women. There were significant differences by sociodemographic factors, particularly ethnicity, in women's worries about early labour. Compared to White women, women from Black or minority ethnic groups had an adjusted Odds ratio of 1.61 (95% confidence interval 1.60, 2.28) of feeling worried about not knowing when labour would start. Among women who contacted a midwife at the start of labour, 84% perceived their advice as appropriate, more in older and multiparous women. Overall, 60% of women were asked to come in to hospital at this time, more in multiparous women (adjusted Odds ratio 1.47, 95% confidence interval 1.24, 1.75). Being denied antenatal education was associated with greater worry about early labour. Five themes emerged from the qualitative analysis. These were:

*'Assumptions about identifying active labour', 'Staff attitudes', 'Not being allowed...', 'Previous labours', and 'The consequences for women'.*

Conclusions: These findings reinforce the importance of providing reassurance to women in early labour, taking care that women do not feel neglected or dismissed. In particular, young primiparous

1  
2  
3 women and those from minority ethnic groups reported greater worry about aspects of early labour  
4  
5 than other women and require additional reassurance.  
6  
7  
8  
9  
10  
11  
12

### 13 **Article summary**

#### 14 ***Strengths and limitations of the study***

- 15
- 16
- 17
- 18 • Large study based on random sample of birth registrations in England.
- 19
- 20 • Both quantitative and qualitative data from women relating to early labour.
- 21
- 22 • Response rate of 47% makes generalisation difficult.
- 23
- 24
- 25 • Respondents, especially those who wrote free-text comments, predominantly primiparous,
- 26
- 27 educated, and resident in less deprived areas.  
28  
29  
30  
31  
32  
33  
34  
35  
36  
37  
38  
39  
40  
41  
42  
43  
44  
45  
46  
47  
48  
49  
50  
51  
52  
53  
54  
55  
56  
57  
58  
59  
60

## INTRODUCTION

Early labour, also known as the latent phase, has been defined in a number of different ways but the National Institute for Health and Clinical Excellence (NICE) defines it as a period of time when there are painful contractions and some cervical change.(1) Early labour is usually a slow process during which women may feel distress and anxiety, and lose confidence in their ability to cope.(2) The resulting stress hormones may counter the effects of oxytocin and slow the progress of labour(3) resulting in further anxiety and distress.

Many studies have demonstrated that admission to hospital prior to active labour increases the risk of oxytocin augmentation, epidural analgesia and caesarean section.(4-9) Health professionals therefore strongly recommend to women that they stay home as long as possible, until contractions are as frequent as three in ten minutes. This cut-off is based on a graphic approach developed by Friedman in the 1950s.(10) However, for women, the negative effects of staying at home in pain include confusion, anger and resentment, feeling neglected, unsupported and anxious.(2) It has been estimated that between 30% and 45% of women are admitted to hospital prior to active labour.(11, 12)

A randomised trial of an intervention providing additional support to women at home during early labour resulted in more admissions in active labour, reduced use of analgesia, reduced neonatal morbidity, and increased maternal satisfaction although emotional wellbeing and distress did not differ between the groups.(12) Other studies have found no significant benefit associated with structured care involving one-to-one care, positioning techniques, and positive imagery in early labour,(13) or use of an algorithm for defining active labour based on presence of painful, regular, moderate or strong contractions and either cervical effacement and dilation of at least 3cm, spontaneous rupture of membranes, or a 'show'.(14)

Several studies have used qualitative techniques to examine women's views and experience of care in early labour.(15-18) The findings of these studies reflect women's uncertainty and anxiety about

1  
2  
3 presenting at hospital at the right time, worry about being sent home if they arrive too early, their  
4  
5 need for validation, the pressure as well as support provided by friends and family, surprise  
6  
7 regarding the intensity of pain in early labour, and fatigue resulting in reduced ability to cope. Other  
8  
9 qualitative studies have examined the care of women in early labour from the midwives'  
10  
11 perspective.(19, 20) These stress the importance of providing reassurance to the woman and her  
12  
13 family and normalising the situation. However, they differed in overall paradigm which may reflect  
14  
15 differences in the organisation of care in Norway and the UK. The Norwegian study(19)  
16  
17 acknowledged that some women labour quickly and clinical judgement on the phone is necessarily  
18  
19 limited. These midwives believed that it was best for women to come to hospital for assessment if  
20  
21 they wished and then to feel sufficiently informed and empowered to make the decision to return  
22  
23 home if they were not in active labour. In contrast, the midwives in the UK study(20) stressed the  
24  
25 importance of the midwives' role as 'gatekeeper' acknowledging that they had different priorities  
26  
27 from the women. They reported that they could tell from a woman's voice, or through intuition,  
28  
29 whether she was in active labour. Moreover, some midwives used trivialising language to describe  
30  
31 women in early labour such as 'frequent flyers'. They acknowledged that although labour ward  
32  
33 workload should not take precedence over women's experience, it often did.(20)  
34  
35

36  
37 Only one study used quantitative techniques to explore women's experience of early labour.(17)  
38  
39 They reported that 46% of women were aware of the expectation that they would stay at home  
40  
41 during early labour, and that being made to feel unwelcome, not being treated with respect or as an  
42  
43 individual were associated with feeling dissatisfied with care in early labour. This was exacerbated if  
44  
45 they were sent home more than once without follow-up arrangements being made, or felt  
46  
47 discouraged from returning, especially if they felt that this was due to the unit being busy rather  
48  
49 than it being clinically appropriate.  
50

51  
52 No studies have examined the early labour experiences of women from different sociodemographic  
53  
54 groups although evidence from other studies suggests that women from more disadvantaged groups  
55  
56  
57

1  
2  
3 have poorer experience of maternity care.(21-24) The aim of this study was therefore to explore the  
4  
5 experiences of early labour care among women with different sociodemographic characteristics. It  
6  
7 was also hypothesised that women who attended antenatal education would be less worried about  
8  
9 early labour and less likely to go to hospital early.  
10

## 11 **METHODS**

12  
13  
14 This study involved secondary analysis of a national maternity survey carried out in England in  
15  
16 2014.(25) Women were randomly selected from birth registration statistics by staff at the Office for  
17  
18 National Statistics (ONS) excluding those aged less than 16 years and those whose baby had died.  
19  
20 The questionnaire, together with a letter, information leaflet and sheet in 18 non-English languages  
21  
22 encouraged women to complete the questionnaire (by phone with the help of an interpreter if  
23  
24 necessary) and return it in a Freepost envelope. The questionnaire could also be completed online.  
25  
26 Using a tailored reminder system up to three reminders were sent as required.  
27

28  
29  
30 Women were asked about their experience of maternity care including early labour, and also asked  
31  
32 questions about sociodemographic characteristics and whether they attended antenatal classes.  
33  
34 Using a validated worries checklist they were asked a range of questions, including if, before labour  
35  
36 started, they were worried about not knowing when they would go into labour, and about getting to  
37  
38 the hospital in time (answer options: very, quite, not very, not at all worried).(26) Women who had a  
39  
40 labour were asked if they contacted a midwife or the hospital at the very start of their labour, and if  
41  
42 so, whether they felt that they were given appropriate advice and support. If they had contacted a  
43  
44 midwife or the hospital, they were asked about the response, that is, whether they were asked to  
45  
46 come into the hospital, stay at home, wait and phone again, or phone again if worried.  
47

48  
49 There was space for free-text comment at the point in the questionnaire relating to early labour and  
50  
51 at the end. Women were also asked what they would like to tell other women about having a baby  
52  
53 in that hospital or unit.  
54  
55  
56  
57



1  
2  
3 ONS provided information about each woman's age group, country of birth, marital status, and an  
4 area based measure, the Index of Multiple Deprivation (IMD) in quintiles, which enabled comparison  
5 of responders and non-responders.  
6  
7

8  
9 Women who had a caesarean planned before labour were excluded from the analysis. A descriptive  
10 analysis was carried out using raw percentages to establish how groups' experiences differed. As  
11 there was likely to be overlap between different sociodemographic factors, binary logistic regression  
12 was used to estimate the extent of this, to determine the main drivers for any differences seen, and  
13 to test the effect of antenatal education. All quantitative analyses were carried out in Stata version  
14  
15  
16  
17  
18  
19  
20 13.  
21

22  
23 Free-text responses to the questions relating to care in early labour and at the end of the  
24 questionnaire were analysed following the method of Garcia et al (2004).(27) Responses were  
25 filtered using the keywords 'early', 'latent', 'sent home', 'come/came back', and 'return' then read  
26 and selected if they referred to early labour. Comments were read and coded in an iterative process,  
27 coding themes as they arose using a thematic content analytic approach. Deviant cases were  
28 sought, and triangulation with quantitative data on satisfaction was used to test the credibility and  
29 trustworthiness of the findings.(28)  
30  
31  
32  
33  
34  
35  
36

37  
38 Ethical approval for the survey was obtained from the NRES committee for Yorkshire and The  
39 Humber – Humber Bridge (REC reference 14/YH/0065).  
40  
41  
42

## 43 **RESULTS**

44  
45 Completed questionnaires were received from 4571 women representing a 47% usable response  
46 rate. Compared to non-respondents, women who completed the questionnaire were significantly  
47 more likely to be older, married, living in a less deprived area and born in the UK.(25)  
48  
49  
50  
51  
52  
53  
54  
55  
56  
57

## Quantitative results

The descriptive statistics shown in Table 1 indicate considerable differences in women's worries about early labour and in their care at this time. Worry about knowing when labour would start was significantly greater in those aged 40 years and older, in primiparous women and in women from Black and minority ethnic (BME) groups. Worry about getting to hospital in time was significantly greater in multiparous women and, again, those from BME groups.

**Table 1 – Sociodemographic characteristics of women with worries about early labour**

|                                                  | Worry about knowing when labour would start |      |                         |      | Worry about getting to hospital in time |      |                         |      |     |
|--------------------------------------------------|---------------------------------------------|------|-------------------------|------|-----------------------------------------|------|-------------------------|------|-----|
|                                                  | Very/quite worried                          |      | Not very/at all worried |      | Very/quite worried                      |      | Not very/at all worried |      |     |
|                                                  | N                                           | %    | N                       | %    | N                                       | %    | N                       | %    |     |
| <b>Maternal age (years)</b>                      |                                             |      |                         |      |                                         |      |                         |      |     |
| <20                                              | 49                                          | 49.5 | 50                      | 50.5 | 29                                      | 29.0 | 71                      | 71.0 |     |
| 20-24                                            | 284                                         | 54.5 | 237                     | 45.5 | 204                                     | 39.2 | 317                     | 60.8 |     |
| 25-29                                            | 581                                         | 49.1 | 603                     | 50.9 | 445                                     | 37.6 | 739                     | 62.4 |     |
| 30-34                                            | 687                                         | 45.4 | 826                     | 54.6 | 519                                     | 34.3 | 996                     | 65.7 |     |
| 35-39                                            | 385                                         | 46.4 | 445                     | 53.6 | 296                                     | 36.0 | 526                     | 64.0 |     |
| 40+                                              | 89                                          | 41.2 | 127                     | 58.8 | 69                                      | 31.7 | 149                     | 68.3 |     |
| Total                                            | 2075                                        | 47.6 | 2288                    | 52.4 | 1562                                    | 35.8 | 2798                    | 64.2 |     |
| <b>Parity</b>                                    |                                             |      |                         |      |                                         |      |                         |      |     |
| Primiparous                                      | 1104                                        | 51.4 | 1045                    | 48.6 | 718                                     | 33.5 | 1427                    | 66.5 |     |
| Multiparous                                      | 907                                         | 43.1 | 1195                    | 56.9 | 791                                     | 37.7 | 1308                    | 62.3 |     |
| Total                                            | 2011                                        | 47.3 | 2240                    | 52.7 | 1509                                    | 35.6 | 2735                    | 64.4 | **  |
| <b>Index of multiple deprivation (quintiles)</b> |                                             |      |                         |      |                                         |      |                         |      |     |
| 1 (least deprived)                               | 399                                         | 45.8 | 473                     | 54.2 | 305                                     | 35.1 | 565                     | 64.9 |     |
| 2                                                | 388                                         | 46.9 | 440                     | 53.1 | 292                                     | 35.1 | 539                     | 64.9 |     |
| 3                                                | 427                                         | 47.6 | 470                     | 52.4 | 317                                     | 35.5 | 576                     | 64.5 |     |
| 4                                                | 465                                         | 50.0 | 465                     | 50.0 | 345                                     | 36.9 | 589                     | 63.1 |     |
| 5 (most deprived)                                | 396                                         | 47.3 | 441                     | 52.7 | 303                                     | 36.4 | 530                     | 63.6 |     |
| Total                                            | 2075                                        | 47.5 | 2289                    | 52.5 | 1562                                    | 35.8 | 2799                    | 64.2 |     |
| <b>Black or minority ethnic group</b>            |                                             |      |                         |      |                                         |      |                         |      |     |
| No                                               | 1629                                        | 45.4 | 1958                    | 54.6 | 1237                                    | 34.4 | 2355                    | 65.6 |     |
| Yes                                              | 393                                         | 59.0 | 273                     | 41.0 | 288                                     | 43.4 | 375                     | 56.6 |     |
| Total                                            | 2022                                        | 47.5 | 2231                    | 52.5 | 1525                                    | 35.8 | 2730                    | 64.2 | *** |

\*  $p < 0.05$  \*\*  $p < 0.01$  \*\*\*  $p < 0.001$

Overall, 77% of women who experienced a labour contacted a midwife or the hospital at the start of labour (Table 2). This was significantly more likely in younger women and those from BME groups. Overall, 84% of women reported receiving appropriate advice at this time, with significantly more reporting this among older and multiparous women. Women were more likely to consider the advice appropriate if it included coming into hospital (Figure 1). Overall, two-thirds of women were eventually asked to come in to the hospital to be assessed, but 40% were at some point asked to stay at home and phone again later. This latter was significantly more common in women who were younger, primiparous, and resident in areas of least deprivation (Table 3).

**Table 2 – Sociodemographic characteristics of women contacting a health professional at the start of labour**

|                                                  | Contacted a MW/hospital at start of labour |      |     |      | Received appropriate advice? |      |     |      |     |
|--------------------------------------------------|--------------------------------------------|------|-----|------|------------------------------|------|-----|------|-----|
|                                                  | Yes                                        |      | No  |      | Yes                          |      | No  |      |     |
|                                                  | N                                          | %    | N   | %    | N                            | %    | N   | %    |     |
| <b>Maternal age (years)</b>                      |                                            |      |     |      |                              |      |     |      |     |
| <20                                              | 68                                         | 78.2 | 19  | 21.8 | 50                           | 73.5 | 18  | 26.5 |     |
| 20-24                                            | 370                                        | 77.7 | 106 | 22.3 | 287                          | 77.6 | 83  | 22.4 |     |
| 25-29                                            | 859                                        | 79.5 | 221 | 20.5 | 719                          | 83.7 | 140 | 16.3 |     |
| 30-34                                            | 994                                        | 77.2 | 293 | 22.8 | 854                          | 85.9 | 140 | 14.1 |     |
| 35-39                                            | 517                                        | 76.4 | 160 | 23.6 | 455                          | 88.0 | 62  | 12.0 |     |
| 40+                                              | 95                                         | 62.9 | 56  | 37.1 | 86                           | 90.5 | 9   | 9.5  |     |
| Total                                            | 2903                                       | 77.2 | 855 | 22.8 | 2451                         | 84.4 | 452 | 15.6 | *** |
| <b>Parity</b>                                    |                                            |      |     |      |                              |      |     |      |     |
| Primiparous                                      | 1495                                       | 78.1 | 419 | 21.9 | 1235                         | 82.6 | 260 | 17.4 |     |
| Multiparous                                      | 1324                                       | 76.0 | 418 | 24.0 | 1148                         | 86.7 | 176 | 13.3 |     |
| Total                                            | 2819                                       | 77.1 | 837 | 22.9 | 2383                         | 84.5 | 436 | 15.5 | **  |
| <b>Index of multiple deprivation (quintiles)</b> |                                            |      |     |      |                              |      |     |      |     |
| 1 (least deprived)                               | 556                                        | 75.3 | 182 | 24.7 | 478                          | 86.0 | 78  | 14.0 |     |
| 2                                                | 537                                        | 76.0 | 170 | 24.0 | 449                          | 83.6 | 88  | 16.4 |     |
| 3                                                | 606                                        | 78.1 | 170 | 21.9 | 520                          | 85.8 | 86  | 14.2 |     |
| 4                                                | 618                                        | 77.3 | 181 | 22.7 | 519                          | 84.0 | 99  | 16.0 |     |
| 5 (most deprived)                                | 586                                        | 79.3 | 153 | 20.7 | 486                          | 82.9 | 100 | 17.1 |     |
| Total                                            | 2903                                       | 77.2 | 856 | 22.8 | 2452                         | 84.5 | 451 | 15.5 |     |
| <b>Black or minority ethnic group</b>            |                                            |      |     |      |                              |      |     |      |     |
| No                                               | 2340                                       | 75.7 | 750 | 24.3 | 1977                         | 84.5 | 363 | 15.5 |     |
| Yes                                              | 483                                        | 84.6 | 88  | 15.4 | 406                          | 84.1 | 77  | 15.9 |     |
| Total                                            | 2823                                       | 77.1 | 838 | 22.9 | 2383                         | 84.4 | 440 | 15.6 | *** |

\*  $p < 0.05$  \*\*  $p < 0.01$  \*\*\*  $p < 0.001$

**Table 3 – If midwife or hospital contacted in early labour, woman asked to come in or stay home**

|                                                  | If contacted MW:<br>stay home/phone again |      |      |      | If contacted MW:<br>come in to hospital |      |      |      |      |
|--------------------------------------------------|-------------------------------------------|------|------|------|-----------------------------------------|------|------|------|------|
|                                                  | Yes                                       |      | No   |      | Yes                                     |      | No   |      |      |
|                                                  | N                                         | %    | N    | %    | N                                       | %    | N    | %    |      |
| <b>Maternal age (years)</b>                      |                                           |      |      |      |                                         |      |      |      |      |
| <20                                              | 29                                        | 50.9 | 28   | 49.1 | 40                                      | 69.0 | 18   | 31.0 |      |
| 20-24                                            | 161                                       | 49.8 | 162  | 50.2 | 207                                     | 64.5 | 114  | 35.5 |      |
| 25-29                                            | 362                                       | 46.0 | 425  | 54.0 | 514                                     | 66.2 | 263  | 33.8 |      |
| 30-34                                            | 401                                       | 43.6 | 519  | 56.4 | 598                                     | 64.9 | 324  | 35.1 |      |
| 35-39                                            | 191                                       | 39.7 | 290  | 60.3 | 310                                     | 63.9 | 175  | 36.1 |      |
| 40+                                              | 30                                        | 34.1 | 58   | 65.9 | 58                                      | 61.1 | 37   | 38.9 |      |
| Total                                            | 1174                                      | 44.2 | 1482 | 55.8 | *                                       | 1727 | 65.0 | 931  | 35.0 |
| <b>Parity</b>                                    |                                           |      |      |      |                                         |      |      |      |      |
| Primiparous                                      | 714                                       | 52.2 | 655  | 47.8 |                                         | 812  | 61.2 | 515  | 38.8 |
| Multiparous                                      | 424                                       | 35.0 | 789  | 65.0 |                                         | 866  | 69.0 | 389  | 31.0 |
| Total                                            | 1138                                      | 44.1 | 1444 | 55.9 | ***                                     | 1678 | 65.0 | 904  | 35.0 |
| <b>Index of multiple deprivation (quintiles)</b> |                                           |      |      |      |                                         |      |      |      |      |
| 1 (least deprived)                               | 249                                       | 48.3 | 266  | 51.7 |                                         | 305  | 60.3 | 201  | 39.7 |
| 2                                                | 244                                       | 49.3 | 251  | 50.7 |                                         | 312  | 63.8 | 177  | 36.2 |
| 3                                                | 243                                       | 42.6 | 327  | 57.4 |                                         | 348  | 63.2 | 203  | 36.8 |
| 4                                                | 236                                       | 42.8 | 316  | 57.2 |                                         | 392  | 68.3 | 182  | 31.7 |
| 5 (most deprived)                                | 201                                       | 38.4 | 323  | 61.6 |                                         | 371  | 68.8 | 168  | 31.2 |
| Total                                            | 1173                                      | 44.2 | 1483 | 55.8 | **                                      | 1728 | 65.0 | 931  | 35.0 |
| <b>Black or minority ethnic group</b>            |                                           |      |      |      |                                         |      |      |      |      |
| No                                               | 962                                       | 44.9 | 1180 | 55.1 |                                         | 1365 | 63.9 | 770  | 36.1 |
| Yes                                              | 188                                       | 42.5 | 254  | 57.5 |                                         | 307  | 68.7 | 140  | 31.3 |
| Total                                            | 1150                                      | 44.5 | 1434 | 55.5 |                                         | 1672 | 64.8 | 910  | 35.2 |

\*  $p < 0.05$  \*\*  $p < 0.01$  \*\*\*  $p < 0.001$

As many of these sociodemographic factors overlap, e.g. primiparous women are more likely to be in the younger age groups, a series of binary logistic regressions were undertaken to understand the most important factors in these associations (Tables 4 and 5). These confirmed the importance of maternal age, parity and ethnicity for worries about going in to labour; age and parity for contacting a health care professional and feeling that they had received appropriate advice. Parity and residence in an area of deprivation remained associated with being asked to come into hospital (sometimes after being asked to wait or phone back later) after adjustment for the other sociodemographic factors.

**Table 4 – Binary logistic regression showing combined effects of sociodemographic factors on worries about going into labour**

|                               |                    | Very/quite worried about not knowing when labour would start |              | Very/quite worried about getting to hospital in time |              |
|-------------------------------|--------------------|--------------------------------------------------------------|--------------|------------------------------------------------------|--------------|
|                               |                    | OR                                                           | (95% CI)     | OR                                                   | (95% CI)     |
| Maternal age (years)          | <20                | 1.11                                                         | (0.72, 1.70) | 0.83                                                 | (0.51, 1.33) |
|                               | 20-24              | 1.45                                                         | (1.17, 1.79) | 1.30                                                 | (1.05, 1.62) |
|                               | 25-29              | 1.07                                                         | (0.92, 1.26) | 1.18                                                 | (1.00, 1.39) |
|                               | 30-34              | 1.00                                                         |              | 1.00                                                 |              |
|                               | 35-39              | 1.08                                                         | (0.90, 1.28) | 1.06                                                 | (0.88, 1.27) |
|                               | 40+                | 0.81                                                         | (0.60, 1.09) | 0.83                                                 | (0.61, 1.14) |
| Parity                        | Primiparous        | 1.00                                                         |              | 1.00                                                 |              |
|                               | Multiparous        | 0.71                                                         | (0.63, 0.81) | 1.22                                                 | (1.07, 1.39) |
| Index of multiple deprivation | 1 (least deprived) | 1.00                                                         |              | 1.00                                                 |              |
|                               | 2                  | 0.97                                                         | (0.80, 1.18) | 0.96                                                 | (0.79, 1.18) |
|                               | 3                  | 0.98                                                         | (0.81, 1.19) | 1.00                                                 | (0.82, 1.22) |
|                               | 4                  | 1.04                                                         | (0.85, 1.26) | 0.96                                                 | (0.78, 1.17) |
|                               | 5 (most deprived)  | 0.85                                                         | (0.69, 1.05) | 0.89                                                 | (0.72, 1.10) |
| Ethnicity                     | White              | 1.00                                                         |              | 1.00                                                 |              |
|                               | BME                | 1.91                                                         | (1.60, 2.28) | 1.47                                                 | (1.23, 1.76) |

*BME Black or minority ethnic group*

#### **Antenatal education**

It was postulated that worry about labour might be reduced in women who had attended antenatal education. Half of primiparous but only 9% of multiparous women attended NHS (free) antenatal classes, a further 23% of primiparous and 4% of multiparous women attended non-NHS classes for which they paid. For *primiparous women only*, there was a strong association between being unable to attend NHS classes, either because they were not offered or because they were booked up, and feeling 'very worried' about not knowing when labour would start (but not about getting to hospital in time). After adjustment for age, ethnicity and IMD, women who were denied antenatal classes had an Odds ratio of 1.58 (95% confidence interval 1.10-2.25) of being very worried about not knowing when labour would start. BME women were significantly less likely to attend antenatal classes due to not being offered them or them being booked up. However, those BME women who *did* attend classes were no less likely to be worried about these aspects of early labour.

**Table 5 – Binary logistic regression showing combined effects of sociodemographic factors on experience of contacting midwife or hospital in early labour**

|                               |                    | Contacted HCP at start of labour |              | Received appropriate advice |              | Asked to come into hospital |              |
|-------------------------------|--------------------|----------------------------------|--------------|-----------------------------|--------------|-----------------------------|--------------|
| Maternal age (years)          | <20                | 0.80                             | (0.53, 1.23) | 0.50                        | (0.27, 0.92) | 1.24                        | (0.69, 2.25) |
|                               | 20-24              | 0.94                             | (0.77, 1.16) | 0.56                        | (0.41, 0.78) | 0.98                        | (0.74, 1.29) |
|                               | 25-29              | 1.15                             | (0.99, 1.35) | 0.80                        | (0.61, 1.04) | 1.11                        | (0.90, 1.37) |
|                               | 30-34              | 1.00                             |              | 1.00                        |              |                             |              |
|                               | 35-39              | 0.95                             | (0.80, 1.12) | 1.10                        | (0.79, 1.53) | 0.93                        | (0.73, 1.17) |
|                               | 40+                | 0.51                             | (0.38, 0.68) | 1.62                        | (0.76, 3.43) | 0.76                        | (0.49, 1.18) |
| Parity                        | Primiparous        | 1.00                             |              | 1.00                        |              | 1.00                        |              |
|                               | Multiparous        | 0.88                             | (0.78, 0.99) | 1.25                        | (1.01, 1.56) | 1.47                        | (1.24, 1.75) |
| Index of multiple deprivation | 1 (least deprived) | 1.00                             |              | 1.00                        |              | 1.00                        |              |
|                               | 2                  | 0.92                             | (0.76, 1.12) | 0.86                        | (0.61, 1.20) | 1.21                        | (0.93, 1.58) |
|                               | 3                  | 1.07                             | (0.89, 1.29) | 1.07                        | (0.76, 1.51) | 1.14                        | (0.88, 1.48) |
|                               | 4                  | 0.96                             | (0.79, 1.16) | 0.94                        | (0.67, 1.32) | 1.37                        | (1.05, 1.78) |
|                               | 5 (most deprived)  | 1.03                             | (0.84, 1.25) | 0.89                        | (0.63, 1.27) | 1.32                        | (1.00, 1.73) |
| Ethnicity                     | White              | 1.00                             |              | 1.00                        |              | 1.00                        |              |
|                               | BME                | 1.16                             | (0.98, 1.38) | 0.90                        | (0.68, 1.19) | 1.15                        | (0.92, 1.45) |

*BME Black and minority ethnic group*

## Qualitative results

Fifty-nine women wrote free-text comments relating to early labour. Table 6 shows the characteristics of these women compared to survey respondents overall. They were disproportionately older, primiparous, more educated and resident in the least deprived quintiles but none of the differences was statistically significant. Table 7 shows the main themes that arose from the free-text comments relating to early labour. These were '*Assumptions about identifying active labour*', '*Staff attitudes*', '*Not being allowed...*', '*Previous labours*', and '*The consequences for women*'. Individual quotations are used to illustrate these themes.

**Table 6 – Sociodemographic characteristics of women who wrote free-text comments relating to early labour compared to all respondents**

|                                         |                    | Women who wrote free-text comments relating to early labour |      | All women who completed the questionnaire |      |
|-----------------------------------------|--------------------|-------------------------------------------------------------|------|-------------------------------------------|------|
|                                         |                    | N                                                           | %    | N                                         | %    |
| Maternal age (years)                    | 16-24              | 7                                                           | 11.9 | 640                                       | 14.0 |
|                                         | 25-34              | 22                                                          | 37.3 | 2818                                      | 61.6 |
|                                         | 35 or more         | 30                                                          | 50.8 | 1118                                      | 24.2 |
| Parity                                  | Primiparous        | 32                                                          | 56.1 | 2207                                      | 49.8 |
|                                         | Multiparous        | 25                                                          | 43.9 | 2223                                      | 50.2 |
| Ethnicity                               | White              | 49                                                          | 84.5 | 3715                                      | 83.9 |
|                                         | BME                | 9                                                           | 15.5 | 713                                       | 16.1 |
| Index of multiple deprivation           | 1 (least deprived) | 15                                                          | 25.4 | 901                                       | 19.7 |
|                                         | 2                  | 12                                                          | 20.3 | 867                                       | 18.9 |
|                                         | 3                  | 13                                                          | 22.0 | 935                                       | 20.4 |
|                                         | 4                  | 9                                                           | 15.2 | 978                                       | 21.4 |
|                                         | 5 (most deprived)  | 10                                                          | 16.9 | 896                                       | 19.6 |
| Left FT education aged <16 years        |                    | 6                                                           | 10.3 | 757                                       | 16.9 |
| Left FT education aged 16 years or more |                    | 53                                                          | 89.7 | 3727                                      | 83.1 |

*BME Black and minority ethnic group; FT full time*

#### **Assumptions about identifying women in active labour**

Women understood that to be credible and viewed by midwives as genuinely in labour, they had to meet certain criteria regarding frequency and duration of contractions. However, not all women in active labour met these criteria:

*Contractions started on a Weds, had the baby on a Saturday. Kept ringing the maternity ward to be told not to come in until I was 3-10-1 (3 contractions in 10 minutes, lasting 1 minute each).*

*That isn't going to apply to everyone and [one] should be invited into hospital. [Primip, IMD1, 25-29 yrs, white]*

*The only time I felt a little bit more believed was when I called the hospital when my contractions were 5 mins apart ... [Multip, IMD1, 35-39 yrs, white]*

**Table 7 – Main themes and examples arising from the qualitative analysis**

| Themes                                      | Examples                                                                                                                                                                                                                                             |
|---------------------------------------------|------------------------------------------------------------------------------------------------------------------------------------------------------------------------------------------------------------------------------------------------------|
| Assumptions about identifying active labour | 'Rules' about contractions<br>Behaviour of women in active labour<br>Having to pretend/exaggerate about contractions                                                                                                                                 |
| Staff attitudes                             | Insensitive, rude, abrupt, dismissive, negative response<br>Being made to feel foolish<br>Feeling vindicated – women in active labour not early labour as staff had thought<br>Received inappropriate advice: stay home, have bath, take paracetamol |
| Not being allowed...                        | To come in, to stay – sent home, unit busy<br>Be examined/checked - having to beg for VE                                                                                                                                                             |
| Previous labours                            | Primiparous women needing reassurance, being uncertain<br>Multiparous women having experience, recognising active labour, being dismissed                                                                                                            |
| The consequences for women                  | Rushed delivery - insufficient time for preparation & pain relief<br>Not a normal birth - Instrumental/operative delivery<br>Upset - distress, delayed attachment to baby                                                                            |

*[...] Called hospital 9 hours later, told midwife I had urge to push, still advised to stay home due to contraction frequency. Felt very uncomfortable, husband called 999, waters broke as soon as ambulance came and I began pushing at home. Decided to go to hospital by ambulance, baby born shortly after arrival. [Primip, IMD1, 25-29 yrs, white]*

*Went into hospital in labour 3 min contractions and sent home again as only 1.5 cm dilated - less than 2 hours later I gave birth, crowning in the hospital car park, head out in the elevator. This was very traumatic and wish they allowed me to stay instead of stranding me at home. [Primip, IMD5, 30-34 yrs, white]*



1  
2  
3 Women also reported that midwives judged from their voice and behaviour whether they were in  
4  
5 active labour. Some women therefore deliberately 'acted' the part:  
6

7  
8 *When we went into labour with this baby, I phoned the hospital twice and both times they said I*  
9  
10 *didn't sound like I was in labour and suggested I stay at home, [...] They made us feel a bit silly for*  
11  
12 *coming into hospital, as I wasn't "screaming and shouting", they assumed I was only in early*  
13  
14 *labour. [Multip, IMD3, 35-39 yrs, white]*  
15

16  
17 *[...] After my husband lied to the hospital about the time between contractions I was eventually*  
18  
19 *told to come in. Although my waters hadn't broken I was already 6 cm dilated. [Primip, IMD2, 30-*  
20  
21 *34 yrs, white]*  
22

23  
24 *The advice/instruction I was given was to telephone the MLU once contractions were every 2/3*  
25  
26 *minutes apart or if my waters broke etc. My contractions were irregular throughout my entire*  
27  
28 *labour [...] I felt I needed to lie and state my waters had broke [...] in order to be able to attend*  
29  
30 *hospital in order for them to examine me... [Primip, IMD5, 30-34 yrs, white]*  
31

### 32 **Staff attitudes**

33  
34 Many women reported negative staff attitudes both on the phone and when attending the unit for  
35  
36 assessment. Women were made to feel foolish by midwives who were insensitive, rude, abrupt and  
37  
38 dismissive:  
39

40  
41  
42 *I was distressed during my labour as one of the midwives was very patronising in telling me that*  
43  
44 *my contractions weren't as painful as I was experiencing, she sent me home twice. [Primip, IMD5,*  
45  
46 *30-34 yrs, BME]*  
47

48  
49 *[...] I had to scream/cry down the phone before she abruptly told me "you better come in then"*  
50  
51 *not a pleasant experience. [Multip, IMD3, 30-34 yrs, white]*  
52

53  
54 Another common theme was women feeling vindicated, the midwife having assumed that they were  
55  
56 not in active labour, but upon examination, they were close to full dilatation:  
57

1  
2  
3 *I knew I was further along than they assumed and insisted on an exam where they discovered I*  
4 *was 6cm and baby came 3 hours later! [Multip, IMD3, 35-39 yrs, white]*

5  
6  
7 *Eventually I rang back to say I want to come in to be checked over only to be told "well you will*  
8 *probably end up going home anyway". [...] Would like to point out when arrived at hospital when I*  
9 *was checked over I was 9 cm. [Primip, IMD1, 25-29 yrs, white]*

#### 14 **Not being allowed...**

15  
16 Women reported not being allowed to come into hospital, not being allowed to stay, and in a few  
17 cases, having to beg for a vaginal examination. This made them more anxious as they felt that  
18 hospital was a safer place than home:  
19  
20

21  
22  
23 *Labour was slow so kept getting told to stay at home - that was very distressing and made me*  
24 *more anxious. [Primip, IMD3, 25-29 yrs, BME]*

25  
26  
27  
28 *I felt quite pushed back from the hospital when I phoned. I was bleeding (my show) and having*  
29 *regular pains but I just got told to stay at home and if I went through they would just send me*  
30 *away. [Primip, IMD5, 20-24 yrs, BME]*

31  
32  
33 *Crying out in pain and begging for midwife to check over/do internal to see how dilated.*

34  
35  
36  
37 *Only then discovered 6/7 cm dilated and wheeled in wheelchair to labour ward. [Primip, IMD1, 25-*  
38 *29 yrs, white]*

39  
40  
41  
42 In addition, some women reported that staff did not take account of their travel time, necessitating  
43 several lengthy and uncomfortable journeys:  
44  
45

46  
47 *My waters broke 11.30pm - phoned hospital told to go in [...] Got told to go home as it was my 1st*  
48 *baby - told to look out for contractions [...] by 7am I was in pain - phoned hospital told to go back*  
49 *in - my 3rd 40 min journey - when I got to hospital - got told I was in the very early stages of*  
50 *labour - not checked at all and got told to go home [...] Got home - another 40 min journey.*

51  
52  
53  
54 *Started bleeding was being sick and in pain - phone hospital again and got told to go back AGAIN*

1  
2  
3 *[...] When I got to the hospital, I couldn't walk [...]* Got to the labour ward on the 6th floor - told I  
4  
5 *was fully dilated and the head was there [...]* [Primip, IMD3, 35-39 yrs, white]  
6  
7

8 The above quote also illustrates a sub-theme of 'Not being checked' which was reported by several  
9 women and was associated with delay in diagnosis of active labour and inappropriate management:  
10

11  
12 *The midwives were very supportive and polite, the only thing I was unhappy about was that I was*  
13  
14 *sent home after my water broke, without doctor assessment, few hours later I had vaginal*  
15  
16 *bleeding and me and my husband rushed to the hospital.* [Primip, IMD4, 30-34 yrs, white]  
17  
18  
19 *[...] labour started naturally at 1am. I informed the midwife at 5am but she refused to believe I*  
20  
21 *was in established labour. By the time I convinced her to check me at 7:45am, I was 9cm dilated*  
22  
23 *and baby was born within next ten mins. The lesson to be learnt is that some midwives will only*  
24  
25 *take you seriously if you are screaming in pain.* [Multip, IMD4, 25-29 yrs, ethnicity missing]  
26  
27

## 28 **Previous labours**

29  
30 Some midwives were reportedly unwilling to take account of parity in assessing whether a woman  
31  
32 was in early or active labour. Primiparous women clearly need more support and reassurance:  
33

34  
35 *Being my first pregnancy when I went into labour I was unsure. [...]* I feel for first time mums - a  
36  
37 *little more understanding at the hospital that we don't know what our bodies are doing would*  
38  
39 *help.* [Primip, IMD2, 30-34 yrs, white]  
40  
41

42 Multiparous women who had experienced labour before are likely to recognise the different stages  
43  
44 and sometimes reported not being listened to. Advice to other women included "you know your  
45  
46 body" and "trust your instincts".  
47

48  
49 *[...] My husband was told to leave and I was transferred to a ward. I was still having contractions*  
50  
51 *but told it would be ages until active labour. I explained my contractions were always irregular*  
52  
53 *but once pain increased the 2nd stage would be very quick [...]* My husband was still told to go  
54  
55 *home. After he left I started having more painful contractions and called for the midwife. She*  
56  
57

1  
2  
3 *checked me and thought active labour had started and went to call the labour ward. I had to call*  
4 *her back 5 minutes later as I needed to start pushing. I called my husband but he did not get there*  
5 *in time. It was a very scary experience as there was no equipment in the room to deliver the baby*  
6 *(as it was a normal antenatal ward) [...] [Multip, IMD3, 30-34 yrs, BME]*

7  
8  
9  
10  
11 *When I went into labour with my 3rd child I called the labour ward and wanted to come into*  
12 *hospital but they wouldn't let me. I didn't feel like she was listening to me even though I said I*  
13 *labour quickly. By the time I got to hospital I was in too much pain to have IV's [for Group B strep].*  
14 *If I'd gone into hospital when I wanted to then I would have had pain relief sooner and would have*  
15 *received the antibiotics. [Multip, IMD5, 35-39 yrs, white]*

### 22 23 **The consequences for women**

24  
25 Many of the women who had felt let down by staff in early labour, having to stay at home when they  
26  
27 wanted to be in hospital, went on to report a failure to get appropriate pain relief and medication  
28  
29 (as in the previous quote), a rushed, sometimes operative, delivery, feelings of shock and delayed  
30  
31 attachment to their baby:

32  
33  
34 *[...] Felt unhappy as hadn't had chance for pain relief option and baby had become distressed. Felt*  
35 *that I should have been kept in hospital when first went in or made to feel more welcome on*  
36 *phone. Not the way I wanted my labour to be and was worrying for me and my husband. [Primip,*  
37 *IMD1, 25-29 yrs, white]*

38  
39  
40  
41  
42  
43 *My labour was a bit stop-start and the unit suggested I didn't come in until the contractions were*  
44 *every 3 mins and at least 1 minute in duration. I don't feel this was the right advice for me and*  
45 *regret not going to get checked out as I think if I had gone in after my contractions were about 5*  
46 *minutes, I may have had a natural birth rather than C-section. However, the care I received was*  
47 *excellent other than that. [Primip, IMD2, 25-29 yrs, white]*

1  
2  
3 *[...] My baby's head was already out by the time the midwife arrived in the room. I had to have my*  
4 *baby standing up as there was not time to get on the bed. I was in complete shock when my baby*  
5 *was born due to this and I did not feel the immediate rush of love for my baby because I was in*  
6 *too much shock and pain. [Multip, IMD3, 30-34 yrs, white]*  
7  
8  
9

10  
11 Some women ascribed their poor experiences to staff shortages or the facilities being particularly  
12 busy:  
13

14  
15  
16 *I feel that women are expected to go through the biggest proportion of labour on their own at*  
17 *home because there are not enough staff. I felt that it was left until the last minute to take me to*  
18 *a labour room. I was even told they had to move someone to get me in. I felt alone helpless and*  
19 *confused as to why I had been told to wait in an antenatal ward as I was 'only' in the early stages*  
20 *and couldn't have pain relief or support from a midwife. I had to force my husband to go and get*  
21 *someone as I could not cope with the pain. When they came they examined me and then panicked*  
22 *and got gas and air and rushed to get me a room! When I got into a labour room I asked for an*  
23 *epidural as I had lost all composure and could not cope anymore. I strongly feel that if I had had*  
24 *the support of a midwife a lot sooner I would not have needed an epidural or the following*  
25 *ventouse delivery [...]* [Primip, IMD2, 30-34 yrs, white]  
26  
27  
28  
29  
30  
31  
32  
33  
34  
35  
36  
37

38 *They [staff] were horribly rushed, kept saying things would happen that didn't happen, didn't pass*  
39 *information between colleagues, and didn't give us consistent information. It was clear that they*  
40 *were horribly overworked and were dealing with people in more priority than me. I feel confident*  
41 *that I would have got more attention had I been higher priority (I wasn't at risk) but it was an*  
42 *unpleasant experience where I felt powerless and confused for a lot of the time ...* [Primip, IMD2,  
43 *30-34 yrs, white]*  
44  
45  
46  
47  
48  
49  
50

51 All the free-text comments relating to early labour were negative so it was not possible to estimate  
52 the association between qualitative comments and the quantitative measure of satisfaction with  
53 care during labour and birth. However, among women who wrote a free-text comment relating to  
54  
55  
56  
57

1  
2  
3 early labour, only 32.1% were very satisfied with their care at this time compared to 62.8% in the  
4  
5 whole sample. The proportions who were very dissatisfied were 7.1% and 2.3% respectively.  
6  
7 Similarly, whilst 84% of women overall felt that they received appropriate advice when they phoned  
8  
9 a midwife in early labour, only 36% of women who wrote free-text comments considered the advice  
10  
11 appropriate.  
12

## 13 14 **DISCUSSION**

15  
16 The findings of this study suggest that there is considerable variation in women's experience of early  
17  
18 labour depending on sociodemographic characteristics. Although the differences by parity are to be  
19  
20 expected, the significantly increased worry among BME women is more surprising. However, it  
21  
22 confirms the findings of a previous study which found that ethnic minority women were more likely  
23  
24 to report high levels of worry about almost all aspects of birth irrespective of parity and residence in  
25  
26 an area of deprivation.<sup>(29)</sup> After adjusting for parity, ethnicity and IMD, women aged 20-24 years  
27  
28 were also more likely to be worried about not knowing when labour would start and about getting  
29  
30 to hospital in time and, again, this is consistent with earlier research.<sup>(22)</sup> Women in this age group  
31  
32 were also significantly less likely to feel that they received appropriate advice when they phoned a  
33  
34 midwife or the hospital.  
35  
36

37  
38 Primiparous women who were not able to attend NHS antenatal classes, either because they were  
39  
40 not offered or because they were booked up, were significantly more likely to be very worried about  
41  
42 not knowing when labour would start. This finding persisted after adjustment for sociodemographic  
43  
44 characteristics. This is consistent with the findings of a Danish randomised controlled trial which  
45  
46 found that antenatal education in small groups increased women's confidence in their ability to cope  
47  
48 at home during labour.<sup>(30)</sup> However, the women who were unable to access NHS antenatal  
49  
50 education in the current study were also significantly less likely to have planned their pregnancy or  
51  
52 to have booked before 10 weeks. Thus, they may have been more worried generally.  
53  
54  
55  
56  
57  
58  
59  
60

1  
2  
3 The free-text comments relating to women's experience of early labour were entirely negative. This  
4 partly reflects the propensity for respondents to write additional comments when they have an issue  
5 about which they would like to comment or complain.(27) To put it into context, over three-quarters  
6 of women contacting a midwife or hospital at the start of labour reported receiving good advice but  
7 the corresponding proportion for women who wrote free-text responses on this topic was just over  
8 a third. The main themes related to staff assumptions and attitudes, and not being allowed to come  
9 to hospital or stay, and these resonate strongly with earlier studies.(2, 16-18, 20, 31) In particular,  
10 the study by Spiby et al (2014)(20) used focus groups to understand the views of UK midwives  
11 dealing with women in early labour. They found that some midwives held negative perceptions and  
12 stereotypes of women and labelled them accordingly. Studies which analysed this subject from  
13 women's perspectives underscored the importance to women of arriving at the hospital at the 'right  
14 time', the distress associated with being sent home, and the impact of having a caring or uncaring  
15 midwife, of being believed.(2, 16) The neglect felt by some women at this time echoes the results of  
16 a study of women's experience of the early phase of induction of labour.(32)

17  
18  
19  
20  
21  
22  
23  
24  
25  
26  
27  
28  
29  
30  
31  
32  
33 The other two themes that arose in this study related to parity and the consequences for women of  
34 poor early labour care. Parity is not mentioned in the literature although some studies only included  
35 primiparous women.(12, 14, 17, 18) In this study, the issues facing primiparous and multiparous  
36 women differed: primiparous women wanted more support and reassurance whereas multiparous  
37 women, having already experienced labour, remembered how it felt and were sometimes angry at  
38 not being believed. Some women reported negative consequences resulting from inaccurate  
39 diagnosis of labour. These included a lack of time for pain relief, medication and delayed attachment  
40 to their baby, also women who thought that an operative delivery may have been avoided had early  
41 labour been better managed. Although this latter outcome has been demonstrated to result from  
42 admission in early labour,(1, 2) no qualitative studies have reported on this.

1  
2  
3 A strength of this study is that it was based on a large random sample of births in England and uses  
4 both quantitative and qualitative data from the same primiparous and multiparous women.

5  
6 Limitations include the 47% response rate with under-representation of young women, those born  
7 outside the UK, and women resident in deprived areas.(25) Similarly, the free-text comments were  
8 disproportionately from primiparous, more educated women, and those resident in the least  
9 deprived quintile. However, qualitative research aims to be transferable rather than generalisable  
10 and the characteristics of women who wrote free-text comments are shown in Table 6. Moreover,  
11 the findings are consistent with those of other studies and the numbers of women, even in minority  
12 groups, are substantial.  
13  
14  
15  
16  
17  
18  
19  
20  
21

## 22 **Conclusions and implications for practice**

23  
24 These findings reinforce those of other studies stressing the importance of providing reassurance to  
25 women in early labour, taking care that women do not feel neglected or dismissed. In particular,  
26 young primiparous women and those from minority ethnic groups report greater worry about  
27 aspects of early labour than other women and require additional reassurance. Whilst most women  
28 who are not contracting strongly and regularly can be reassured that they can safely stay at home,  
29 some women labour very rapidly. The Norwegian midwives cited in the study by Eri et al (2011)(19)  
30 recommended that women come into hospital to be assessed and to see how their labour  
31 progresses. If they are not in active labour, they can then decide for themselves that they would be  
32 more comfortable at home and feel confident in going home.(19) This model may require additional  
33 resources to set up, but if it helps women to come into hospital in active labour, it may save  
34 resources overall.  
35  
36  
37  
38  
39  
40  
41  
42  
43  
44  
45  
46  
47

48 Antenatal education may have a role in improving women's and partners' knowledge and confidence  
49 in coping at home but a recent systematic review reported a lack of good evidence as to its  
50 effectiveness in promoting good obstetric and psychosocial outcomes more generally.(33)  
51  
52  
53  
54  
55  
56  
57  
58  
59  
60



1  
2  
3 In summary, most women were not particularly worried about early labour and most of those who  
4 contacted a midwife at this time felt that they received appropriate advice. However, some women  
5 clearly felt that their care at this time had been poor suggesting that this is an area where  
6 improvements could be made.  
7  
8  
9

## 10 11 12 **ACKNOWLEDGEMENTS**

13  
14 Our particular thanks go to the women who completed the surveys and to Mark Gautrey and staff at  
15 the Office for National Statistics who were responsible for drawing the sample and managing the  
16 mailings. The Office for National Statistics provided data for the sampling frame but bear no  
17 responsibility for its analysis and interpretation.  
18  
19  
20  
21

## 22 23 **COMPETING INTERESTS**

24  
25 The authors declare that they have no competing interests.  
26  
27

## 28 29 **FUNDING**

30  
31 This paper reports on an independent study which is funded by the Policy Research Programme in  
32 the Department of Health. The views expressed are not necessarily those of the Department. The  
33 Department of Health was not involved in any aspect of the study.  
34  
35  
36  
37

## 38 39 **AUTHORS' CONTRIBUTIONS**

40 JH initiated this study, conducted the analyses and drafted the manuscript. MR was the principal  
41 investigator for women's surveys and helped direct the analysis. Both authors revised the  
42 manuscript.  
43  
44  
45  
46

## 47 48 **DATA SHARING STATEMENT**

49  
50 Further analyses of these data are planned so data will not be shared until these are completed.  
51  
52  
53  
54  
55  
56  
57

## REFERENCES

1. National Institute for Health and Care Excellence. Intrapartum care for healthy women and babies 2014 [Available from: nice.org.uk/guidance/cg190].
2. Hanada N, Matsuki M, Ota E, Mori R. Psychosocial and educational interventions in latent phase or early labour for improving birth outcomes (Protocol). *Cochrane Db Syst Rev* 2015(2).
3. Alehagen S, Wijma B, Lundberg U, Wijma K. Fear, pain and stress hormones during childbirth. *J Psychosom Obstet Gynaecol* 2005;26(3):153-65.
4. Hemminki E, Simukka R. The timing of hospital admission and progress of labour. *Eur J Obstet Gynecol Reprod Biol* 1986;22(1-2):85-94.
5. Holmes P, Oppenheimer LW, Wen SW. The relationship between cervical dilatation at initial presentation in labour and subsequent intervention. *BJOG* 2001;108(11):1120-4.
6. Klein MC, Kelly A, Kaczorowski J, Grzybowski S. The effect of family physician timing of maternal admission on procedures in labour and maternal and infant morbidity. *J Obstet Gynaecol Can* 2004;26(7):641-5.
7. Bailit JL, Dierker L, Blanchard MH, Mercer BM. Outcomes of women presenting in active versus latent phase of spontaneous labor. *Obstet Gynecol* 2005;105(1):77-9.
8. Petersen A, Penz SM, Gross MM. Women's perception of the onset of labour and epidural analgesia: a prospective study. *Midwifery* 2013;29(4):284-93.
9. Rahnama P, Ziaei S, Faghihzadeh S. Impact of early admission in labor on method of delivery. *Int J Gynaecol Obstet* 2006;92(3):217-20.
10. Friedman E. Labor: clinical evaluation and management, 2nd ed. New York: Appleton-Century Crofts; 1978.
11. Cheyne H, Dowding DW, Hundley V. Making the diagnosis of labour: midwives' diagnostic judgement and management decisions. *J Adv Nurs* 2006;53(6):625-35.
12. Janssen PA, Desmarais SL. Women's experience with early labour management at home vs. in hospital: a randomised controlled trial. *Midwifery* 2013;29(3):190-4.
13. Hodnett ED, Stremler R, Willan AR, Weston JA, Lowe NK, Simpson KR, et al. Effect on birth outcomes of a formalised approach to care in hospital labour assessment units: international, randomised controlled trial. *BMJ* 2008;337:a1021.
14. Cheyne H, Hundley V, Dowding D, Bland JM, McNamee P, Greer I, et al. Effects of algorithm for diagnosis of active labour: cluster randomised trial. *BMJ* 2008;337:a2396.
15. Carlsson IM, Hallberg LR, Odberg Pettersson K. Swedish women's experiences of seeking care and being admitted during the latent phase of labour: a grounded theory study. *Midwifery* 2009;25(2):172-80.
16. Eri TS, Bondas T, Gross MM, Janssen P, Green JM. A balancing act in an unknown territory: a metasynthesis of first-time mothers' experiences in early labour. *Midwifery* 2015;31(3):e58-67.
17. Green JM, Spiby H, Hucknall C, Richardson Foster H. Converting policy into care: women's satisfaction with the early labour telephone component of the All Wales Clinical Pathway for Normal Labour. *J Adv Nurs* 2012;68(10):2218-28.
18. Cappelletti G, Nespoli A, Fumagalli S, Borrelli SE. First-time mothers' experiences of early labour in Italian maternity care services. *Midwifery* 2016;34:198-204.
19. Eri TS, Blystad A, Gjengedal E, Blaaka G. 'Stay home for as long as possible': midwives' priorities and strategies in communicating with first-time mothers in early labour. *Midwifery* 2011;27(6):e286-92.
20. Spiby H, Walsh D, Green J, Crompton A, Bugg G. Midwives' beliefs and concerns about telephone conversations with women in early labour. *Midwifery* 2014;30(9):1036-42.
21. Henderson J, Gao H, Redshaw M. Experiencing maternity care: the care received and perceptions of women from different ethnic groups. *BMC Pregnancy Childbirth* 2013;13:196.
22. Henderson J, Redshaw M. Worries About Labor and Birth: A Population-Based Study of Outcomes for Young Primiparous Women. *Birth* 2016;43(2):151-8.

- 1  
2  
3 23. Redshaw M, Henderson J. Who is actually asked about their mental health in pregnancy and  
4 the postnatal period? Findings from a national survey. *BMC Psychiatry* 2016;16(1):322.  
5 24. Lindquist A, Kurinczuk JJ, Redshaw M, Knight M. Experiences, utilisation and outcomes of  
6 maternity care in England among women from different socio-economic groups: findings from the  
7 2010 National Maternity Survey. *BJOG* 2015;122(12):1610-7.  
8 25. Redshaw M, Henderson J. Safely delivered: a national survey of women's experience of  
9 maternity care 2014. Oxford; 2015.  
10 26. Redshaw M, Martin C, Rowe R, Hockley C. The Oxford Worries about Labour Scale: women's  
11 experience and measurement characteristics of a measure of maternal concern about labour and  
12 birth. *Psychol Health Med* 2009;14(3):354-66.  
13 27. Garcia J, Evans J, Redshaw M. "Is there anything else you would like to tell us?" -  
14 methodological issues in the use of free-text comments from postal surveys. *Qual Quant*  
15 2004;38:113-25.  
16 28. Golafshani N. Understanding reliability and validity in qualitative research. *Qual Rep*  
17 2003;8(4):597-607.  
18 29. Redshaw M, Heikkila K. Ethnic differences in women's worries about labour and birth. *Ethn*  
19 *Health* 2011;16(3):213-23.  
20 30. Brixval CS, Axelsen SF, Thygesen LC, Due P, Koushede V. Antenatal education in small classes  
21 may increase childbirth self-efficacy: Results from a Danish randomised trial. *Sex Reprod Healthc*  
22 2016;10:32-4.  
23 31. Marowitz A. Caring for women in early labor: can we delay admission and meet women's  
24 needs? *J Midwifery Womens Health* 2014;59(6):645-50.  
25 32. Henderson J, Redshaw M. Women's experience of induction of labor: a mixed methods  
26 study. *Acta Obstet Gynecol Scand* 2013;92(10):1159-67.  
27 33. Brixval CS, Axelsen SF, Lauemoller SG, Andersen SK, Due P, Koushede V. The effect of  
28 antenatal education in small classes on obstetric and psycho-social outcomes - a systematic review.  
29 *Syst Rev* 2015;4:20.  
30  
31  
32  
33  
34  
35  
36  
37  
38  
39  
40  
41  
42  
43  
44  
45  
46  
47  
48  
49  
50  
51  
52  
53  
54  
55  
56  
57  
58  
59  
60

1  
2  
3  
4  
5  
6  
7  
8  
9  
10  
11  
12  
13  
14  
15  
16  
17  
18  
19  
20  
21  
22  
23  
24  
25  
26  
27  
28  
29  
30  
31  
32  
33  
34  
35  
36  
37  
38  
39  
40  
41  
42  
43  
44  
45  
46  
47  
48  
49  
50  
51  
52  
53  
54  
55  
56  
57  
58  
59  
60

Figure 1 – Numbers and proportions of women contacting midwife or hospital at the start of labour and resulting care (of the 3867 women who laboured)

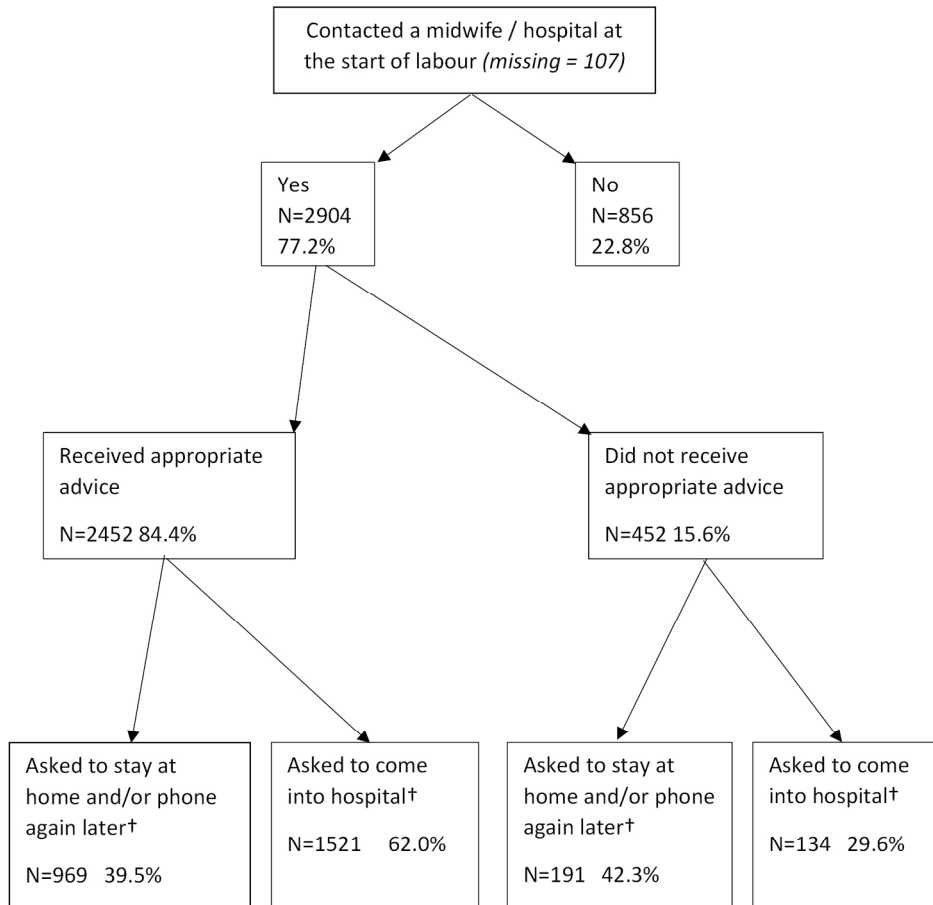

† Not exclusive categories

159x199mm (300 x 300 DPI)

## STROBE Statement—checklist of items that should be included in reports of observational studies

|                              | Item No | Recommendation                                                                                                                                                                             | Page |
|------------------------------|---------|--------------------------------------------------------------------------------------------------------------------------------------------------------------------------------------------|------|
| <b>Title and abstract</b>    | 1       | (a) Indicate the study's design with a commonly used term in the title or the abstract                                                                                                     | 1    |
|                              |         | (b) Provide in the abstract an informative and balanced summary of what was done and what was found                                                                                        | 2    |
| <b>Introduction</b>          |         |                                                                                                                                                                                            |      |
| Background/rationale         | 2       | Explain the scientific background and rationale for the investigation being reported                                                                                                       | 4-6  |
| Objectives                   | 3       | State specific objectives, including any prespecified hypotheses                                                                                                                           | 6    |
| <b>Methods</b>               |         |                                                                                                                                                                                            |      |
| Study design                 | 4       | Present key elements of study design early in the paper                                                                                                                                    | 6    |
| Setting                      | 5       | Describe the setting, locations, and relevant dates, including periods of recruitment, exposure, follow-up, and data collection                                                            | 6    |
| Participants                 | 6       | (a) <i>Cohort study</i> —Give the eligibility criteria, and the sources and methods of selection of participants. Describe methods of follow-up                                            | 6    |
|                              |         | <i>Case-control study</i> —Give the eligibility criteria, and the sources and methods of case ascertainment and control selection. Give the rationale for the choice of cases and controls |      |
|                              |         | <i>Cross-sectional study</i> —Give the eligibility criteria, and the sources and methods of selection of participants                                                                      | 6    |
|                              |         | (b) <i>Cohort study</i> —For matched studies, give matching criteria and number of exposed and unexposed                                                                                   |      |
|                              |         | <i>Case-control study</i> —For matched studies, give matching criteria and the number of controls per case                                                                                 |      |
| Variables                    | 7       | Clearly define all outcomes, exposures, predictors, potential confounders, and effect modifiers. Give diagnostic criteria, if applicable                                                   | 6-7  |
| Data sources/<br>measurement | 8*      | For each variable of interest, give sources of data and details of methods of assessment (measurement). Describe comparability of assessment methods if there is more than one group       | 6-7  |
| Bias                         | 9       | Describe any efforts to address potential sources of bias                                                                                                                                  | 7    |
| Study size                   | 10      | Explain how the study size was arrived at                                                                                                                                                  | 6    |
| Quantitative variables       | 11      | Explain how quantitative variables were handled in the analyses. If applicable, describe which groupings were chosen and why                                                               | 7    |
| Statistical methods          | 12      | (a) Describe all statistical methods, including those used to control for confounding                                                                                                      | 7    |
|                              |         | (b) Describe any methods used to examine subgroups and interactions                                                                                                                        |      |
|                              |         | (c) Explain how missing data were addressed                                                                                                                                                |      |
|                              |         | (d) <i>Cohort study</i> —If applicable, explain how loss to follow-up was addressed                                                                                                        |      |
|                              |         | <i>Case-control study</i> —If applicable, explain how matching of cases and controls was addressed                                                                                         |      |
|                              |         | <i>Cross-sectional study</i> —If applicable, describe analytical methods taking account of sampling strategy                                                                               |      |
|                              |         | (e) Describe any sensitivity analyses                                                                                                                                                      |      |

Continued on next page

| <b>Results</b>           |     |                                                                                                                                                                                                                                                                                                                                                                                                               |                  |
|--------------------------|-----|---------------------------------------------------------------------------------------------------------------------------------------------------------------------------------------------------------------------------------------------------------------------------------------------------------------------------------------------------------------------------------------------------------------|------------------|
| Participants             | 13* | (a) Report numbers of individuals at each stage of study—eg numbers potentially eligible, examined for eligibility, confirmed eligible, included in the study, completing follow-up, and analysed<br>(b) Give reasons for non-participation at each stage<br>(c) Consider use of a flow diagram                                                                                                               | 7-8<br><br>Fig 1 |
| Descriptive data         | 14* | (a) Give characteristics of study participants (eg demographic, clinical, social) and information on exposures and potential confounders<br>(b) Indicate number of participants with missing data for each variable of interest<br>(c) <i>Cohort study</i> —Summarise follow-up time (eg, average and total amount)                                                                                           | Tables 1-3       |
| Outcome data             | 15* | <i>Cohort study</i> —Report numbers of outcome events or summary measures over time<br><i>Case-control study</i> —Report numbers in each exposure category, or summary measures of exposure<br><i>Cross-sectional study</i> —Report numbers of outcome events or summary measures                                                                                                                             | Tables 1-3       |
| Main results             | 16  | (a) Give unadjusted estimates and, if applicable, confounder-adjusted estimates and their precision (eg, 95% confidence interval). Make clear which confounders were adjusted for and why they were included<br>(b) Report category boundaries when continuous variables were categorized<br>(c) If relevant, consider translating estimates of relative risk into absolute risk for a meaningful time period | Tables 4-5       |
| Other analyses           | 17  | Report other analyses done—eg analyses of subgroups and interactions, and sensitivity analyses                                                                                                                                                                                                                                                                                                                |                  |
| <b>Discussion</b>        |     |                                                                                                                                                                                                                                                                                                                                                                                                               |                  |
| Key results              | 18  | Summarise key results with reference to study objectives                                                                                                                                                                                                                                                                                                                                                      | 20               |
| Limitations              | 19  | Discuss limitations of the study, taking into account sources of potential bias or imprecision. Discuss both direction and magnitude of any potential bias                                                                                                                                                                                                                                                    | 22               |
| Interpretation           | 20  | Give a cautious overall interpretation of results considering objectives, limitations, multiplicity of analyses, results from similar studies, and other relevant evidence                                                                                                                                                                                                                                    | 20-22            |
| Generalisability         | 21  | Discuss the generalisability (external validity) of the study results                                                                                                                                                                                                                                                                                                                                         | 22               |
| <b>Other information</b> |     |                                                                                                                                                                                                                                                                                                                                                                                                               |                  |
| Funding                  | 22  | Give the source of funding and the role of the funders for the present study and, if applicable, for the original study on which the present article is based                                                                                                                                                                                                                                                 | 23               |

\*Give information separately for cases and controls in case-control studies and, if applicable, for exposed and unexposed groups in cohort and cross-sectional studies.

**Note:** An Explanation and Elaboration article discusses each checklist item and gives methodological background and published examples of transparent reporting. The STROBE checklist is best used in conjunction with this article (freely available on the Web sites of PLoS Medicine at <http://www.plosmedicine.org/>, Annals of Internal Medicine at <http://www.annals.org/>, and Epidemiology at <http://www.epidem.com/>). Information on the STROBE Initiative is available at [www.strobe-statement.org](http://www.strobe-statement.org).

# BMJ Open

## Sociodemographic differences in women's experience of early labour care: a mixed methods study

|                                 |                                                                                                                           |
|---------------------------------|---------------------------------------------------------------------------------------------------------------------------|
| Journal:                        | <i>BMJ Open</i>                                                                                                           |
| Manuscript ID                   | bmjopen-2017-016351.R1                                                                                                    |
| Article Type:                   | Research                                                                                                                  |
| Date Submitted by the Author:   | 23-Mar-2017                                                                                                               |
| Complete List of Authors:       | Henderson, Jane; NPEU, Nuffield Department of Population Health<br>Redshaw, Maggie; NPEU, Department of Population Health |
| <b>Primary Subject Heading</b>: | Obstetrics and gynaecology                                                                                                |
| Secondary Subject Heading:      | Epidemiology                                                                                                              |
| Keywords:                       | OBSTETRICS, Maternal medicine < OBSTETRICS, EPIDEMIOLOGY                                                                  |
|                                 |                                                                                                                           |

SCHOLARONE™  
Manuscripts

Peer review only

1  
2  
3  
4  
5  
6  
7  
8  
9 **Sociodemographic differences in women's experience**  
10  
11 **of early labour care: a mixed methods study**  
12  
13

14  
15 Jane Henderson BSc(Hons) MSc PhD\*

16  
17 Maggie Redshaw BA PhD CPsychol  
18  
19

20  
21 Policy Research Unit in Maternal Health and Care,  
22

23  
24 National Perinatal Epidemiology Unit,  
25

26  
27 Nuffield Department of Population Health,  
28

29  
30 University of Oxford,  
31

32  
33 Old Road Campus,  
34

35  
36 Old Road,  
37

38  
39 Oxford, UK  
40

41  
42 \* Corresponding author

43  
44 Tel: 01865 289758; Fax: 01865 289701  
45

46  
47 Email: [jane.henderson@npeu.ox.ac.uk](mailto:jane.henderson@npeu.ox.ac.uk)  
48

49  
50 Email: [maggie.redshaw@npeu.ox.ac.uk](mailto:maggie.redshaw@npeu.ox.ac.uk)  
51

52  
53 Word count: 4850  
54  
55  
56  
57  
58  
59  
60



## Abstract

Objectives: To explore women's experiences of early labour care focussing on sociodemographic differences, and to examine the effect of antenatal education, using mixed methods.

Setting: England, 2014.

Participants: Women who completed postal questionnaires about their experience of maternity care, including questions about antenatal education, early labour and sociodemographic factors, included space for free-text comments.

Outcome measures: Worries about labour, contact with midwives in early labour and subsequent care.

Methods: This study was based on secondary analysis of a national maternity survey carried out in England in 2014. Quantitative data were analysed using descriptive statistics and binary logistic regression, qualitative data were analysed using a thematic content analytic approach.

Results: Completed questionnaires were received from 4578 women (47% response rate). There were significant differences by sociodemographic factors, particularly ethnicity, in women's worries about early labour. Compared to White women, women from Black or minority ethnic groups had an adjusted Odds ratio of 1.93 (95% confidence interval 1.56, 2.39) of feeling worried about not knowing when labour would start. Among women who contacted a midwife at the start of labour, 84% perceived their advice as appropriate, more in older and multiparous women. Overall, 64% of women were asked to come in to hospital at this time, more in multiparous women (adjusted Odds ratio 1.63, 95% confidence interval 1.35, 1.96). Those who did not have access to antenatal education experienced greater worry about early labour. Five themes emerged from the qualitative analysis: '*Differentiating between early and active labour*', '*Staff attitudes*', '*Not being allowed...*', '*Previous labours*', and '*Perceived consequences for women*'.

1  
2  
3 Conclusions: These findings reinforce the importance of providing reassurance to women in early  
4 labour, taking care that women do not feel neglected or dismissed. In particular, primiparous and  
5 ethnic minority women reported greater worry about early labour and require additional  
6 reassurance.  
7  
8  
9  
10  
11  
12  
13  
14

## 15 **Article summary**

### 16 ***Strengths and limitations of the study***

- 17 • Large study based on random sample of birth registrations in England.
- 18 • Both quantitative and qualitative data from women relating to early labour.
- 19 • Response rate of 47% makes generalisation difficult.
- 20 • Respondents, especially those who wrote free-text comments, predominantly primiparous,  
21 educated, and resident in less deprived areas.  
22  
23  
24  
25  
26  
27  
28  
29  
30  
31  
32  
33  
34  
35  
36  
37  
38  
39  
40  
41  
42  
43  
44  
45  
46  
47  
48  
49  
50  
51  
52  
53  
54  
55  
56  
57  
58  
59  
60

## INTRODUCTION

Early labour, also known as the latent phase, has been defined in a number of different ways but the National Institute for Health and Clinical Excellence (NICE) defines it as a period of time when there are painful contractions and some cervical change.(1) Early labour is usually a slow process during which women may feel distress and anxiety, and lose confidence in their ability to cope.(2) The resulting stress hormones may counter the effects of oxytocin and slow the progress of labour(3) resulting in further anxiety and distress.

Many observational studies have noted that admission to hospital prior to active labour increases the risk of oxytocin augmentation, epidural analgesia and caesarean section.(4-9) Health professionals therefore strongly recommend to women that they stay home as long as possible, until contractions are as frequent as three in ten minutes. This cut-off is based on a graphic approach developed by Friedman in the 1950s.(10) However, for women, the negative effects of staying at home in pain include confusion, anger and resentment, feeling neglected, unsupported and anxious.(2) It has been estimated that between 30% and 45% of women are admitted to hospital prior to active labour.(11, 12)

A randomised trial of an intervention providing additional support to women at home during early labour resulted in more admissions in active labour, reduced use of analgesia, reduced neonatal morbidity, and increased maternal satisfaction although emotional wellbeing and distress did not differ between the groups.(12) Other studies have found no significant benefit associated with structured care involving one-to-one care, positioning techniques, and positive imagery in early labour,(13) or use of an algorithm for defining active labour based on presence of painful, regular, moderate or strong contractions and either cervical effacement and dilation of at least 3cm, spontaneous rupture of membranes, or a 'show'.(14)

Several studies have used qualitative techniques to examine women's views and experience of care in early labour.(15-18) The findings of these studies reflect women's uncertainty and anxiety about

1  
2  
3 presenting at hospital at the right time, worry about being sent home if they arrive too early, their  
4  
5 need for validation, the pressure as well as support provided by friends and family, surprise and  
6  
7 consternation regarding the intensity of pain in early labour, and fatigue resulting in reduced ability  
8  
9 to cope. Other qualitative studies have examined the care of women in early labour from the  
10  
11 midwives' perspective.(19, 20) These stress the importance of providing reassurance to the woman  
12  
13 and her family and normalising the situation. However, they differed in overall paradigm which may  
14  
15 reflect differences in the organisation of care in Norway and the UK. The Norwegian study(19)  
16  
17 acknowledged that some women labour quickly and clinical judgement on the phone is necessarily  
18  
19 limited. These midwives believed that it was best for women to come to hospital for assessment if  
20  
21 they wished and then to feel sufficiently informed and empowered to make the decision to return  
22  
23 home if they were not in active labour. In contrast, the midwives in the UK study(20) stressed the  
24  
25 importance of the midwives' role as 'gatekeeper' acknowledging that they had different priorities  
26  
27 from the women. They reported that they could tell from a woman's voice, or through intuition,  
28  
29 whether she was in active labour. Moreover, some midwives used trivialising language to describe  
30  
31 women in early labour such as 'frequent flyers'. They acknowledged that although labour ward  
32  
33 workload should not take precedence over women's experience, it often did.(20)  
34  
35

36  
37 Only one study used quantitative techniques to explore women's experience of early labour.(17)  
38  
39 They reported that 46% of women were aware of the expectation that they would stay at home  
40  
41 during early labour, and that being made to feel unwelcome, not being treated with respect or as an  
42  
43 individual were associated with feeling dissatisfied with care in early labour. This was exacerbated if  
44  
45 they were sent home more than once without follow-up arrangements being made, or felt  
46  
47 discouraged from returning, especially if they felt that this was due to the unit being busy rather  
48  
49 than it being clinically appropriate.  
50

51  
52 No studies have examined the early labour experiences of women from different sociodemographic  
53  
54 groups although evidence from other studies suggests that women from more disadvantaged groups  
55  
56  
57

1  
2  
3 have poorer experience of maternity care.(21-26) The aims of this study were therefore (i) to explore  
4 the experiences of early labour care, both quantitatively and qualitatively, among women with  
5 different sociodemographic characteristics, and (ii) to determine whether women who attended  
6 antenatal education were less worried about early labour and less likely to go to hospital early.  
7  
8  
9  
10

## 11 **METHODS**

12  
13  
14 This study involved secondary analysis of a national maternity survey carried out in England in  
15 2014.(27) Ten thousand women were randomly selected from birth registration statistics by staff at  
16 the Office for National Statistics (ONS) excluding those aged less than 16 years and those whose  
17 baby had died. The questionnaire, together with a letter, information leaflet, and a sheet with a  
18 single sentence in 18 non-English languages (providing a Freephone number for an interpreter),  
19 encouraged women to complete the questionnaire and return it in a Freepost envelope. These were  
20 sent to women at three months postpartum. The questionnaire could also be completed online.  
21  
22  
23  
24  
25  
26  
27  
28  
29 Using a tailored reminder system, up to three reminders were sent as required.  
30

31  
32 A mixed methods design was used with the questionnaire including both closed and open questions.  
33  
34 Women were asked about their experience of maternity care including early labour, and also asked  
35 questions about sociodemographic characteristics and whether they attended antenatal classes.  
36  
37  
38 Using a validated worries checklist they were asked a range of questions, including if, before labour  
39 started, they were worried about not knowing when they would go into labour, and about getting to  
40 the hospital in time (answer options: very, quite, not very, not at all worried).(28) Women who had a  
41 labour were asked if they contacted a midwife or the hospital at the very start of their labour, and if  
42 so, whether they felt that they were given appropriate advice and support. If they had contacted a  
43 midwife or the hospital, they were asked about the response, that is, whether they were asked to  
44 come into the hospital, stay at home, wait and phone again, or phone again if worried. We have  
45 considered this as early labour care although we acknowledge that it may have also included women  
46 in active labour. All data were necessarily based on women's perception and recall of events.  
47  
48  
49  
50  
51  
52  
53  
54  
55  
56  
57  
58  
59  
60

1  
2  
3 There was space for free-text comment at the point in the questionnaire relating to early labour and  
4  
5 at the end. Women were also asked what they would like to tell other women about having a baby  
6  
7 in that hospital or unit. These free-text comments were the sole source of qualitative data.  
8

9  
10 ONS provided information about each woman's age group, country of birth, marital status, and an  
11  
12 area based measure, the Index of Multiple Deprivation (IMD) in quintiles, which enabled comparison  
13  
14 of responders and non-responders. In this study, IMD, ethnicity (White vs. Black or minority ethnic  
15  
16 group (BME)), maternal age in six categories, and parity (primiparous vs. multiparous) were included  
17  
18 as sociodemographic variables. Women who had an induction of labour or caesarean planned and  
19  
20 carried out before labour were excluded from the analysis.  
21

22  
23 A descriptive analysis was carried out using raw percentages to establish how sociodemographic  
24  
25 groups' experiences differed in their worries about early labour, whether they contacted a health  
26  
27 care professional in early labour and received appropriate advice. Differences were tested using the  
28  
29 chi-square statistic. As there was likely to be overlap between different sociodemographic factors,  
30  
31 binary logistic regression was used to estimate the extent of this, to determine the main drivers for  
32  
33 any differences seen, and to test the effect of antenatal education. Binary logistic regressions were  
34  
35 adjusted for each of the sociodemographic variables. All quantitative analyses were carried out in  
36  
37 Stata version 13.  
38

39  
40 Free-text responses to the questions relating to care in early labour and at the end of the  
41  
42 questionnaire were analysed following the method of Garcia et al (2004).<sup>(29)</sup> Responses were  
43  
44 filtered using the keywords 'early', 'latent', 'sent home', 'come/came back', and 'return' then read  
45  
46 and selected if they referred to early labour. Comments were read and coded in an iterative process  
47  
48 by both authors, coding themes as they arose using a thematic content analytic approach. Where  
49  
50 differences in interpretation arose these were resolved by discussion and reference to the raw data.  
51  
52 Deviant cases were sought, and triangulation with quantitative data on satisfaction was used to test  
53  
54 the credibility and trustworthiness of the findings.<sup>(30)</sup>  
55  
56  
57  
58  
59  
60

1  
2  
3 Ethical approval for the survey was obtained from the NRES committee for Yorkshire and The  
4 Humber – Humber Bridge (REC reference 14/YH/0065). Written informed consent from participants  
5 was not considered necessary; consent was implicit in completion and return of the questionnaire.  
6  
7  
8  
9

## 10 **RESULTS**

11  
12 Completed questionnaires were received from 4578 women representing a 47% usable response  
13 rate. Of these 398 had a planned caesarean section carried out before labour had started, and 1081  
14 had an induction of labour. These were excluded from the analyses leaving 3099 women. These  
15 were 49% primiparous, 83% White, and 42% aged 30 years or more. Compared to non-respondents,  
16 women who completed the questionnaire were significantly more likely to be older, married, living  
17 in a less deprived area and born in the UK.(27)  
18  
19  
20  
21  
22  
23  
24

### 25 **Quantitative results**

26  
27 The descriptive statistics shown in Table 1 indicate considerable differences in women's worries  
28 about early labour and in their care at this time. Worry about knowing when labour would start was  
29 significantly greater in primiparous women and those from BME groups. Worry about getting to  
30 hospital in time was significantly greater in multiparous women and, again, those from BME groups.  
31  
32 Overall, 88% of women contacted a midwife or the hospital at the start of labour (Table 2). This was  
33 significantly less likely in women ages 40 years or more and in multiparous women. Overall, 84% of  
34 women reported receiving appropriate advice at this time, with significantly more reporting this  
35 among older and multiparous women. Women were more likely to consider the advice appropriate  
36 if it included coming into hospital (Figure 1). Overall, two-thirds of women were eventually asked to  
37 come in to the hospital to be assessed, but 48% were at some point asked to stay at home and  
38 phone again later. This latter was significantly more common in primiparous women (Table 3).  
39  
40  
41  
42  
43  
44  
45  
46  
47  
48  
49  
50  
51  
52  
53  
54  
55  
56  
57  
58  
59  
60

Table 1 – Sociodemographic characteristics of women with worries about early labour

|                                                  | Worry about knowing when labour would start<br>(Missing=106) |      |                         |      | Worry about getting to hospital in time<br>(Missing=112) |      |                         |      |     |
|--------------------------------------------------|--------------------------------------------------------------|------|-------------------------|------|----------------------------------------------------------|------|-------------------------|------|-----|
|                                                  | Very/quite worried                                           |      | Not very/at all worried |      | Very/quite worried                                       |      | Not very/at all worried |      |     |
|                                                  | No.                                                          | %    | No.                     | %    | No.                                                      | %    | No.                     | %    |     |
| <b>Maternal age (years)</b>                      |                                                              |      |                         |      |                                                          |      |                         |      |     |
| <20                                              | 40                                                           | 51.9 | 37                      | 48.1 | 54                                                       | 69.2 | 24                      | 30.8 |     |
| 20-24                                            | 159                                                          | 46.2 | 185                     | 53.8 | 209                                                      | 60.6 | 136                     | 39.4 |     |
| 25-29                                            | 441                                                          | 53.3 | 386                     | 46.7 | 510                                                      | 61.6 | 318                     | 38.4 |     |
| 30-34                                            | 579                                                          | 54.0 | 494                     | 46.0 | 673                                                      | 62.9 | 397                     | 37.1 |     |
| 35-39                                            | 298                                                          | 53.2 | 262                     | 46.8 | 338                                                      | 61.1 | 215                     | 38.9 |     |
| 40+                                              | 61                                                           | 55.0 | 50                      | 45.0 | 71                                                       | 63.4 | 41                      | 36.6 |     |
| Total                                            | 1578                                                         | 52.7 | 1414                    | 47.3 | 1855                                                     | 62.1 | 1131                    | 37.9 |     |
| <i>Missing=1</i>                                 |                                                              |      |                         |      |                                                          |      |                         |      |     |
| <b>Parity</b>                                    |                                                              |      |                         |      |                                                          |      |                         |      |     |
| Primiparous                                      | 713                                                          | 49.3 | 733                     | 50.7 | 944                                                      | 65.4 | 499                     | 34.6 |     |
| Multiparous                                      | 834                                                          | 56.7 | 637                     | 43.3 | 866                                                      | 59.1 | 600                     | 40.9 |     |
| Total                                            | 1547                                                         | 53.0 | 1370                    | 47.0 | 1810                                                     | 62.2 | 1099                    | 37.8 | *** |
| <i>Missing=104</i>                               |                                                              |      |                         |      |                                                          |      |                         |      |     |
| <b>Index of multiple deprivation (quintiles)</b> |                                                              |      |                         |      |                                                          |      |                         |      |     |
| 1 (least deprived)                               | 322                                                          | 55.0 | 263                     | 45.0 | 370                                                      | 63.4 | 214                     | 36.6 |     |
| 2                                                | 315                                                          | 54.1 | 267                     | 45.9 | 367                                                      | 62.8 | 217                     | 37.2 |     |
| 3                                                | 329                                                          | 53.8 | 282                     | 46.2 | 381                                                      | 62.7 | 227                     | 37.3 |     |
| 4                                                | 317                                                          | 49.3 | 326                     | 50.7 | 389                                                      | 60.6 | 253                     | 39.4 |     |
| 5 (most deprived)                                | 296                                                          | 51.8 | 275                     | 48.2 | 348                                                      | 61.3 | 220                     | 38.7 |     |
| Total                                            | 1579                                                         | 52.8 | 1413                    | 47.2 | 1855                                                     | 62.1 | 1131                    | 37.9 |     |
| <i>Missing=1</i>                                 |                                                              |      |                         |      |                                                          |      |                         |      |     |
| <b>Black or minority ethnic group</b>            |                                                              |      |                         |      |                                                          |      |                         |      |     |
| No                                               | 1341                                                         | 55.0 | 1098                    | 45.0 | 1557                                                     | 63.7 | 886                     | 36.3 |     |
| Yes                                              | 195                                                          | 41.0 | 281                     | 59.0 | 251                                                      | 53.3 | 220                     | 46.7 |     |
| Total                                            | 1536                                                         | 52.7 | 1379                    | 47.3 | 1808                                                     | 62.0 | 1106                    | 38.0 | *** |
| <i>Missing=109</i>                               |                                                              |      |                         |      |                                                          |      |                         |      |     |

\*  $p < 0.05$  \*\*  $p < 0.01$  \*\*\*  $p < 0.001$



**Table 2 – Sociodemographic characteristics of women contacting a health professional at the start of labour**

|                                                  | Contacted a MW/hospital at start of labour |      |     |      | Received appropriate advice |      |     |      |     |
|--------------------------------------------------|--------------------------------------------|------|-----|------|-----------------------------|------|-----|------|-----|
|                                                  | Yes                                        |      | No  |      | Yes                         |      | No  |      |     |
|                                                  | No.                                        | %    | No. | %    | No.                         | %    | No. | %    |     |
| <b>Maternal age (years)</b>                      |                                            |      |     |      |                             |      |     |      |     |
| <20                                              | 60                                         | 87.0 | 9   | 13.0 | 45                          | 75.0 | 15  | 25.0 |     |
| 20-24                                            | 294                                        | 91.0 | 29  | 9.0  | 224                         | 76.2 | 70  | 23.8 |     |
| 25-29                                            | 699                                        | 90.3 | 75  | 9.7  | 588                         | 84.1 | 111 | 15.9 |     |
| 30-34                                            | 846                                        | 86.6 | 131 | 13.4 | 722                         | 85.3 | 124 | 14.7 |     |
| 35-39                                            | 430                                        | 85.7 | 72  | 14.3 | 379                         | 88.1 | 51  | 11.9 |     |
| 40+                                              | 71                                         | 78.0 | 20  | 22.0 | 66                          | 93.0 | 5   | 7.0  |     |
| Total                                            | 2400                                       | 87.7 | 336 | 12.3 | 2024                        | 84.3 | 376 | 15.7 | *** |
| <b>Parity</b>                                    |                                            |      |     |      |                             |      |     |      |     |
| Primiparous                                      | 1199                                       | 90.8 | 122 | 9.2  | 988                         | 82.4 | 211 | 17.6 |     |
| Multiparous                                      | 1139                                       | 84.6 | 207 | 15.4 | 985                         | 86.5 | 154 | 13.5 |     |
| Total                                            | 2338                                       | 87.7 | 329 | 12.3 | 1973                        | 84.4 | 365 | 15.6 | **  |
| <b>Index of multiple deprivation (quintiles)</b> |                                            |      |     |      |                             |      |     |      |     |
| 1 (least deprived)                               | 475                                        | 88.8 | 60  | 11.2 | 411                         | 86.5 | 64  | 13.5 |     |
| 2                                                | 469                                        | 86.4 | 74  | 13.6 | 391                         | 83.4 | 78  | 16.6 |     |
| 3                                                | 496                                        | 89.0 | 61  | 11.0 | 422                         | 85.1 | 74  | 14.9 |     |
| 4                                                | 496                                        | 86.1 | 80  | 13.9 | 418                         | 84.3 | 78  | 15.7 |     |
| 5 (most deprived)                                | 464                                        | 88.4 | 61  | 11.6 | 383                         | 82.5 | 81  | 17.5 |     |
| Total                                            | 2400                                       | 87.7 | 336 | 12.3 | 2025                        | 84.4 | 375 | 15.6 |     |
| <b>Black or minority ethnic group</b>            |                                            |      |     |      |                             |      |     |      |     |
| No                                               | 1969                                       | 87.4 | 285 | 12.6 | 1661                        | 84.4 | 308 | 15.6 |     |
| Yes                                              | 375                                        | 89.7 | 43  | 10.3 | 314                         | 83.7 | 61  | 16.3 |     |
| Total                                            | 2344                                       | 87.7 | 328 | 12.3 | 1975                        | 84.3 | 369 | 15.7 |     |

\*  $p < 0.05$  \*\*  $p < 0.01$  \*\*\*  $p < 0.001$

**Table 3 – If midwife or hospital contacted in early labour, woman asked to come in or stay home**

|                                                  | If contacted MW:<br>stay home/phone again |      |      |      | If contacted MW:<br>come in to hospital |      |     |      |     |
|--------------------------------------------------|-------------------------------------------|------|------|------|-----------------------------------------|------|-----|------|-----|
|                                                  | Yes                                       |      | No   |      | Yes                                     |      | No  |      |     |
|                                                  | No.                                       | %    | No.  | %    | No.                                     | %    | No. | %    |     |
| <b>Maternal age (years)</b>                      |                                           |      |      |      |                                         |      |     |      |     |
| <20                                              | 25                                        | 49.0 | 26   | 51.0 | 37                                      | 71.2 | 15  | 28.8 |     |
| 20-24                                            | 141                                       | 54.7 | 117  | 45.3 | 155                                     | 62.2 | 94  | 37.8 |     |
| 25-29                                            | 334                                       | 51.2 | 318  | 48.8 | 404                                     | 64.2 | 225 | 35.8 |     |
| 30-34                                            | 375                                       | 47.7 | 411  | 52.3 | 495                                     | 63.7 | 282 | 36.3 |     |
| 35-39                                            | 175                                       | 43.3 | 229  | 56.7 | 256                                     | 63.5 | 147 | 36.5 |     |
| 40+                                              | 27                                        | 39.7 | 41   | 60.3 | 42                                      | 60.0 | 28  | 40.0 |     |
| Total                                            | 1077                                      | 48.5 | 1142 | 51.5 | 1389                                    | 63.7 | 791 | 36.3 | *   |
| <b>Parity</b>                                    |                                           |      |      |      |                                         |      |     |      |     |
| Primiparous                                      | 641                                       | 57.6 | 472  | 42.4 | 617                                     | 58.8 | 433 | 41.2 |     |
| Multiparous                                      | 405                                       | 38.6 | 644  | 61.4 | 740                                     | 68.8 | 335 | 31.2 |     |
| Total                                            | 1046                                      | 48.4 | 1116 | 51.6 | 1357                                    | 63.9 | 768 | 36.1 | *** |
| <b>Index of multiple deprivation (quintiles)</b> |                                           |      |      |      |                                         |      |     |      |     |
| 1 (least deprived)                               | 233                                       | 52.0 | 215  | 48.0 | 260                                     | 60.3 | 171 | 39.7 |     |
| 2                                                | 228                                       | 52.4 | 207  | 47.6 | 258                                     | 61.3 | 163 | 38.7 |     |
| 3                                                | 221                                       | 47.3 | 246  | 52.7 | 277                                     | 62.1 | 169 | 37.9 |     |
| 4                                                | 208                                       | 46.2 | 242  | 53.8 | 314                                     | 67.8 | 149 | 32.2 |     |
| 5 (most deprived)                                | 186                                       | 44.4 | 233  | 55.6 | 281                                     | 66.9 | 139 | 33.1 |     |
| Total                                            | 1076                                      | 48.5 | 1143 | 51.5 | 1390                                    | 63.7 | 791 | 36.3 |     |
| <b>Black or minority ethnic group</b>            |                                           |      |      |      |                                         |      |     |      |     |
| No                                               | 886                                       | 48.7 | 933  | 51.3 | 1130                                    | 63.3 | 655 | 36.7 |     |
| Yes                                              | 170                                       | 49.0 | 177  | 51.0 | 223                                     | 65.2 | 119 | 34.8 |     |
| Total                                            | 1056                                      | 48.8 | 1110 | 51.2 | 1353                                    | 63.6 | 774 | 36.4 |     |

\*  $p < 0.05$  \*\*  $p < 0.01$  \*\*\*  $p < 0.001$

A series of binary logistic regressions was undertaken to understand the most important factors in the associations between sociodemographic variables and perceptions of early labour care (Tables 4 and 5). These confirmed the importance of parity and ethnicity for worries about going in to labour, and suggested that women aged 20-24 years experienced greater worry about not knowing when labour would start. Multiparous women and those aged 40 years or more were significantly less likely to contact a health care professional; and women aged 20-24 years were significantly less likely

to feel that they had received appropriate advice. Parity and, marginally, residence in an area of deprivation remained associated with being asked to come into hospital (sometimes after being asked to wait or phone back later) after adjustment for the other sociodemographic factors.

**Table 4 – Binary logistic regression showing effects of sociodemographic factors on worries about going into labour, each variable adjusted for all others**

|                                      |                    | Very/quite worried about not knowing when labour would start |              | Very/quite worried about getting to hospital in time |              |
|--------------------------------------|--------------------|--------------------------------------------------------------|--------------|------------------------------------------------------|--------------|
|                                      |                    | OR                                                           | (95% CI)     | OR                                                   | (95% CI)     |
| <b>Maternal age (years)</b>          | <20                | 0.98                                                         | (0.60, 1.61) | 0.78                                                 | (0.46, 1.35) |
|                                      | 20-24              | 1.41                                                         | (1.09, 1.83) | 1.20                                                 | (0.92, 1.57) |
|                                      | 25-29              | 0.96                                                         | (0.79, 1.16) | 1.10                                                 | (0.90, 1.33) |
|                                      | 30-34              | 1                                                            |              | 1.00                                                 |              |
|                                      | 35-39              | 1.08                                                         | (0.88, 1.34) | 1.05                                                 | (0.85, 1.31) |
|                                      | 40+                | 0.91                                                         | (0.61, 1.37) | 0.89                                                 | (0.59, 1.35) |
| <b>Parity</b>                        | Primiparous        | 1.00                                                         |              | 1.00                                                 |              |
|                                      | Multiparous        | 0.72                                                         | (0.62, 0.84) | 1.30                                                 | (1.11, 1.52) |
| <b>Index of multiple deprivation</b> | 1 (least deprived) | 1.00                                                         |              | 1.00                                                 |              |
|                                      | 2                  | 0.94                                                         | (0.74, 1.19) | 0.96                                                 | (0.75, 1.23) |
|                                      | 3                  | 0.98                                                         | (0.77, 1.24) | 1.01                                                 | (0.80, 1.29) |
|                                      | 4                  | 1.13                                                         | (0.89, 1.42) | 1.00                                                 | (0.78, 1.27) |
|                                      | 5 (most deprived)  | 0.91                                                         | (0.71, 1.17) | 0.92                                                 | (0.71, 1.19) |
| <b>Ethnicity</b>                     | White              | 1.00                                                         |              | 1.00                                                 |              |
|                                      | BME                | 1.93                                                         | (1.56, 2.39) | 1.56                                                 | (1.26, 1.92) |

BME Black or minority ethnic group

#### Antenatal education

In the UK, women are given information and a registration form for antenatal classes at the time of booking. However, there has been a substantial decline in NHS (free) provision of antenatal classes.(31) It was postulated that worry about labour might be reduced in women who had attended antenatal education. Half of primiparous but only 9% of multiparous women attended NHS antenatal classes, a further 23% of primiparous and 5% of multiparous women attended non-NHS classes for which they paid. For *primiparous women only*, there was a strong association between being unable to attend NHS classes, either because they were not offered or because they were

booked up, and feeling 'very worried' about not knowing when labour would start (but not about getting to hospital in time). After adjustment for age, ethnicity and IMD, women who did not have access to antenatal classes had an Odds ratio of 1.58 (95% confidence interval 1.10-2.25) of being very worried about not knowing when labour would start. BME women were significantly less likely to attend antenatal classes due to not being offered them or them being booked up. However, those BME women who *did* attend classes were no less likely to be worried about these aspects of early labour. These data are shown in Supplementary data.

**Table 5 – Binary logistic regression showing combined effects of sociodemographic factors on experience of contacting midwife or hospital in early labour**

|                               |                    | Contacted HCP at start of labour |              | Received appropriate advice |              | Asked to come into hospital |              |
|-------------------------------|--------------------|----------------------------------|--------------|-----------------------------|--------------|-----------------------------|--------------|
|                               |                    | OR                               | (95% CI)     | OR                          | (95% CI)     | OR                          | (95% CI)     |
| Maternal age (years)          | <20                | 0.87                             | (0.39, 1.90) | 0.55                        | (0.28, 1.05) | 1.51                        | (0.79, 2.86) |
|                               | 20-24              | 1.40                             | (0.90, 2.19) | 0.57                        | (0.40, 0.81) | 0.95                        | (0.70, 1.30) |
|                               | 25-29              | 1.27                             | (0.93, 1.73) | 0.87                        | (0.65, 1.16) | 1.08                        | (0.86, 1.35) |
|                               | 30-34              | 1.00                             |              | 1.00                        |              | 1.00                        |              |
|                               | 35-39              | 0.97                             | (0.71, 1.34) | 1.17                        | (0.82, 1.67) | 0.93                        | (0.72, 1.21) |
|                               | 40+                | 0.56                             | (0.33, 0.96) | 2.70                        | (0.96, 7.58) | 0.77                        | (0.47, 1.28) |
| Parity                        | Primiparous        | 1.00                             |              | 1.00                        |              | 1.00                        |              |
|                               | Multiparous        | 0.59                             | (0.46, 0.75) | 1.24                        | (0.98, 1.58) | 1.63                        | (1.35, 1.96) |
| Index of multiple deprivation | 1 (least deprived) | 1.00                             |              | 1.00                        |              | 1.00                        |              |
|                               | 2                  | 0.75                             | (0.52, 1.09) | 0.84                        | (0.58, 1.21) | 1.09                        | (0.82, 1.45) |
|                               | 3                  | 0.95                             | (0.65, 1.39) | 0.99                        | (0.68, 1.43) | 1.11                        | (0.84, 1.47) |
|                               | 4                  | 0.70                             | (0.49, 1.02) | 0.95                        | (0.66, 1.38) | 1.34                        | (1.01, 1.79) |
|                               | 5 (most deprived)  | 0.91                             | (0.60, 1.36) | 0.88                        | (0.60, 1.29) | 1.23                        | (0.91, 1.66) |
| Ethnicity                     | White              | 1.00                             |              | 1.00                        |              | 1.00                        |              |
|                               | BME                | 1.39                             | (0.98, 1.99) | 0.89                        | (0.65, 1.23) | 1.00                        | (0.77, 1.29) |

*BME Black and minority ethnic group HCP Health care professional*

## Qualitative results

Fifty-nine women wrote free-text comments relating to early labour. Table 6 shows the characteristics of these women compared to survey respondents overall. They were

disproportionately older, primiparous, more educated and resident in the least deprived quintiles but none of the differences was statistically significant. Table 7 shows the main themes that arose from the free-text comments relating to early labour. These were '*Differentiating between early and active labour*', '*Staff attitudes*', '*Not being allowed...*', '*Previous labours*', and '*Perceived consequences for women*'. Individual quotations are used to illustrate these themes.

**Table 6 – Sociodemographic characteristics of women who wrote free-text comments relating to early labour compared to all respondents**

|                                  |                                         | Women who wrote free-text comments relating to early labour |      | All women who completed the questionnaire |      |
|----------------------------------|-----------------------------------------|-------------------------------------------------------------|------|-------------------------------------------|------|
|                                  |                                         | N                                                           | %    | N                                         | %    |
| Maternal age (years)             | 16-24                                   | 7                                                           | 11.9 | 640                                       | 14.0 |
|                                  | 25-34                                   | 22                                                          | 37.3 | 2818                                      | 61.6 |
|                                  | 35 or more                              | 30                                                          | 50.8 | 1118                                      | 24.2 |
|                                  | Total                                   | 59                                                          | 100  | 4576                                      | 100  |
| Parity                           | Primiparous                             | 32                                                          | 56.1 | 2207                                      | 49.8 |
|                                  | Multiparous                             | 25                                                          | 43.9 | 2223                                      | 50.2 |
|                                  | Total                                   | 57                                                          | 100  | 4430                                      | 100  |
| Ethnicity                        | White                                   | 49                                                          | 84.5 | 3715                                      | 83.9 |
|                                  | BME                                     | 9                                                           | 15.5 | 713                                       | 16.1 |
|                                  | Total                                   | 58                                                          | 100  | 4428                                      | 100  |
| Index of multiple deprivation    | 1 (least deprived)                      | 15                                                          | 25.4 | 901                                       | 19.7 |
|                                  | 2                                       | 12                                                          | 20.3 | 867                                       | 18.9 |
|                                  | 3                                       | 13                                                          | 22.0 | 935                                       | 20.4 |
|                                  | 4                                       | 9                                                           | 15.2 | 978                                       | 21.4 |
|                                  | 5 (most deprived)                       | 10                                                          | 16.9 | 896                                       | 19.6 |
|                                  | Total                                   | 59                                                          | 100  | 4577                                      | 100  |
| Left FT education aged <16 years |                                         | 6                                                           | 10.3 | 757                                       | 16.9 |
|                                  | Left FT education aged 16 years or more | 53                                                          | 89.7 | 3727                                      | 83.1 |
|                                  | Total                                   | 59                                                          | 100  | 4484                                      | 100  |

*BME Black and minority ethnic group; FT full time*

#### **Differentiating between early and active labour**

Women understood that to be credible and viewed by midwives as genuinely in labour, they had to meet certain criteria regarding frequency and duration of contractions. However, not all women in active labour met these criteria:

1  
2  
3 *Contractions started on a Weds, had the baby on a Saturday. Kept ringing the maternity ward to*  
4 *be told not to come in until I was 3-10-1 (3 contractions in 10 minutes, lasting 1 minute each).*

5  
6  
7 *That isn't going to apply to everyone and [one] should be invited into hospital. [Primip, IMD1, 25-*  
8 *29 yrs, white]*

9  
10  
11  
12 *Went into hospital in labour 3 min contractions and sent home again as only 1.5 cm dilated - less*  
13 *than 2 hours later I gave birth, crowning in the hospital car park, head out in the elevator. This*  
14 *was very traumatic and wish they allowed me to stay instead of stranding me at home. [Primip,*  
15 *IMD5, 30-34 yrs, white]*

16  
17  
18  
19  
20  
21 Women also reported that midwives judged from their voice and behaviour whether they were in  
22 active labour. Some women therefore deliberately 'acted' the part:

23  
24  
25  
26 *When we went into labour with this baby, I phoned the hospital twice and both times they said I*  
27 *didn't sound like I was in labour and suggested I stay at home, [...] They made us feel a bit silly for*  
28 *coming into hospital, as I wasn't "screaming and shouting", they assumed I was only in early*  
29 *labour. [Multip, IMD3, 35-39 yrs, white]*

30  
31  
32  
33  
34  
35 *[...] After my husband lied to the hospital about the time between contractions I was eventually*  
36 *told to come in. Although my waters hadn't broken I was already 6 cm dilated. [Primip, IMD2, 30-*  
37 *34 yrs, white]*

**Table 7 – Main themes and examples arising from the qualitative analysis**

| Themes                                      | Sub-themes                                                                                                                                                                                                                                                              | Examples                                                                                                                                                                                                                                                                                                                                                                |
|---------------------------------------------|-------------------------------------------------------------------------------------------------------------------------------------------------------------------------------------------------------------------------------------------------------------------------|-------------------------------------------------------------------------------------------------------------------------------------------------------------------------------------------------------------------------------------------------------------------------------------------------------------------------------------------------------------------------|
| Assumptions about identifying active labour | <p>'Rules' about contractions</p> <p>Behaviour of women in active labour</p> <p>Having to pretend/exaggerate about contractions</p>                                                                                                                                     | <p><i>[...] Called hospital 9 hours later, told midwife I had urge to push, still advised to stay home due to contraction frequency. Felt very uncomfortable, husband called 999, waters broke as soon as ambulance came and I began pushing at home. Decided to go to hospital by ambulance, baby born shortly after arrival. [Primip, IMD1, 25-29 yrs, white]</i></p> |
| Staff attitudes                             | <p>Insensitive, rude, abrupt, dismissive, negative response</p> <p>Being made to feel foolish</p> <p>Feeling vindicated – women in active labour not early labour as staff had thought</p> <p>Received inappropriate advice: stay home, have bath, take paracetamol</p> | <p><i>I was distressed during my labour as one of the midwives was very patronising in telling me that my contractions weren't as painful as I was experiencing, she sent me home twice. [Primip, IMD5, 30-34 yrs, BME]</i></p>                                                                                                                                         |
| Not being allowed...                        | <p>To come in, to stay – sent home, unit busy</p> <p>Be examined/checked</p> <p>Having to beg for VE</p>                                                                                                                                                                | <p><i>I felt quite pushed back from the hospital when I phoned. I was bleeding (my show) and having regular pains but I just got told to stay at home and if I went through they would just send me away. [Primip, IMD5, 20-24 yrs, BME]</i></p>                                                                                                                        |
| Previous labours                            | <p>Primiparous women needing reassurance, being uncertain</p> <p>Multiparous women having experience, recognising active labour, being dismissed</p>                                                                                                                    | <p><i>When I went into labour with my 3rd child I called the labour ward and wanted to come into hospital but they wouldn't let me. I didn't feel like she was listening to me even though I said I labour quickly.</i></p>                                                                                                                                             |
| The consequences for women                  | <p>Rushed delivery - insufficient time for preparation &amp; pain relief</p> <p>Not a normal birth - Instrumental/operative delivery</p> <p>Upset - distress, delayed attachment to baby</p>                                                                            | <p><i>[...] Felt unhappy as hadn't had chance for pain relief option and baby had become distressed. Felt that I should have been kept in hospital when first went in or made to feel more welcome on phone. Not the way I wanted my labour to be and was worrying for me and my husband. [Primip, IMD1, 25-29 yrs, white]</i></p>                                      |

**Staff attitudes**

Many women perceived negative staff attitudes both on the phone and when attending the unit for assessment. Women were made to feel foolish by midwives who were insensitive, rude, abrupt and dismissive:

*[...] I had to scream/cry down the phone before she abruptly told me "you better come in then" not a pleasant experience. [Multip, IMD3, 30-34 yrs, white]*

Another common sub-theme was women feeling vindicated, the midwife having assumed that they were not in active labour, but upon examination, they were close to full dilatation:

*I knew I was further along than they assumed and insisted on an exam where they discovered I was 6cm and baby came 3 hours later! [Multip, IMD3, 35-39 yrs, white]*

*Eventually I rang back to say I want to come in to be checked over only to be told "well you will probably end up going home anyway". [...] Would like to point out when arrived at hospital when I was checked over I was 9 cm. [Primip, IMD1, 25-29 yrs, white]*

**Not being allowed...**

Women reported not being allowed to come into hospital, not being allowed to stay, and in a few cases, having to beg for a vaginal examination. This made them more anxious as they felt that hospital was a safer place than home:

*Labour was slow so kept getting told to stay at home - that was very distressing and made me more anxious. [Primip, IMD3, 25-29 yrs, BME]*

*Crying out in pain and begging for midwife to check over/do internal to see how dilated.*

*Only then discovered 6/7 cm dilated and wheeled in wheelchair to labour ward. [Primip, IMD1, 25-29 yrs, white]*

In addition, some women reported that staff did not take account of their travel time, necessitating several lengthy and uncomfortable journeys:



1  
2  
3 *My waters broke 11.30pm - phoned hospital told to go in [...] Got told to go home as it was my 1st*  
4 *baby - told to look out for contractions [...] by 7am I was in pain - phoned hospital told to go back*  
5 *in - my 3rd 40 min journey - when I got to hospital - got told I was in the very early stages of*  
6 *labour - not checked at all and got told to go home [...] Got home - another 40 min journey.*  
7  
8  
9  
10  
11 *Started bleeding was being sick and in pain - phone hospital again and got told to go back AGAIN*  
12 *[...] When I got to the hospital, I couldn't walk [...] Got to the labour ward on the 6th floor - told I*  
13 *was fully dilated and the head was there [...] [Primip, IMD3, 35-39 yrs, white]*

14  
15  
16  
17  
18 The above quote also illustrates a sub-theme of 'Not being checked' which was reported by several  
19 women and was associated with delay in diagnosis of active labour and inappropriate management:  
20

21  
22  
23 *[...] labour started naturally at 1am. I informed the midwife at 5am but she refused to believe I*  
24 *was in established labour. By the time I convinced her to check me at 7:45am, I was 9cm dilated*  
25 *and baby was born within next ten mins. The lesson to be learnt is that some midwives will only*  
26 *take you seriously if you are screaming in pain. [Multip, IMD4, 25-29 yrs, ethnicity missing]*  
27  
28  
29  
30

### 31 32 **Previous labours**

33  
34 Some midwives were reportedly unwilling to take account of parity in assessing whether a woman  
35 was in early or active labour. Primiparous women clearly need more support and reassurance:  
36

37  
38  
39 *Being my first pregnancy when I went into labour I was unsure. [...] I feel for first time mums - a*  
40 *little more understanding at the hospital that we don't know what our bodies are doing would*  
41 *help. [Primip, IMD2, 30-34 yrs, white]*  
42  
43  
44  
45

46 Multiparous women who had experienced labour before are likely to recognise the different stages  
47 and sometimes reported not being listened to. Advice to other women included "you know your  
48 body" and "trust your instincts".  
49

50  
51  
52  
53 *[...] My husband was told to leave and I was transferred to a ward. I was still having contractions*  
54 *but told it would be ages until active labour. I explained my contractions were always irregular*  
55  
56  
57

1  
2  
3 *but once pain increased the 2nd stage would be very quick [...] My husband was still told to go*  
4 *home. After he left I started having more painful contractions and called for the midwife. She*  
5 *checked me and thought active labour had started and went to call the labour ward. I had to call*  
6 *her back 5 minutes later as I needed to start pushing. I called my husband but he did not get there*  
7 *in time. It was a very scary experience as there was no equipment in the room to deliver the baby*  
8 *(as it was a normal antenatal ward) [...] [Multip, IMD3, 30-34 yrs, BME]*

9  
10  
11  
12  
13  
14  
15  
16 *When I went into labour with my 3rd child I called the labour ward and wanted to come into*  
17 *hospital but they wouldn't let me. I didn't feel like she was listening to me even though I said I*  
18 *labour quickly. By the time I got to hospital I was in too much pain to have IV's [for Group B strep].*  
19 *If I'd gone into hospital when I wanted to then I would have had pain relief sooner and would have*  
20 *received the antibiotics. [Multip, IMD5, 35-39 yrs, white]*

#### 21 22 23 24 25 26 27 **Perceived consequences for women**

28  
29 Many of the women who had felt let down by staff in early labour, having to stay at home when they  
30 wanted to be in hospital, went on to report a failure to get appropriate pain relief and medication  
31 (as in the previous quote), a rushed, sometimes operative, delivery, feelings of shock and delayed  
32 attachment to their baby:  
33  
34  
35  
36

37  
38 *My labour was a bit stop-start and the unit suggested I didn't come in until the contractions were*  
39 *every 3 mins and at least 1 minute in duration. I don't feel this was the right advice for me and*  
40 *regret not going to get checked out as I think if I had gone in after my contractions were about 5*  
41 *minutes, I may have had a natural birth rather than C-section. However, the care I received was*  
42 *excellent other than that. [Primip, IMD2, 25-29 yrs, white]*

43  
44  
45  
46  
47  
48  
49 *[...] My baby's head was already out by the time the midwife arrived in the room. I had to have my*  
50 *baby standing up as there was not time to get on the bed. I was in complete shock when my baby*  
51 *was born due to this and I did not feel the immediate rush of love for my baby because I was in*  
52 *too much shock and pain. [Multip, IMD3, 30-34 yrs, white]*

1  
2  
3 Some women ascribed their poor experiences to staff shortages or the facilities being particularly  
4  
5 busy:

6  
7 *They [staff] were horribly rushed, kept saying things would happen that didn't happen, didn't pass*  
8  
9 *information between colleagues, and didn't give us consistent information. It was clear that they*  
10  
11 *were horribly overworked and were dealing with people in more priority than me. I feel confident*  
12  
13 *that I would have got more attention had I been higher priority (I wasn't at risk) but it was an*  
14  
15 *unpleasant experience where I felt powerless and confused for a lot of the time ... [Primip, IMD2,*  
16  
17 *30-34 yrs, white]*  
18  
19

20  
21 All the free-text comments relating to early labour were negative so it was not possible to estimate  
22  
23 the association between qualitative comments and the quantitative measure of satisfaction with  
24  
25 care during labour and birth. However, among women who wrote a free-text comment relating to  
26  
27 early labour, only 32.1% were very satisfied with their care at this time compared to 62.8% in the  
28  
29 whole sample. The proportions who were very dissatisfied were 7.1% and 2.3% respectively.

30  
31 Similarly, whilst 84% of women overall felt that they received appropriate advice when they phoned  
32  
33 a midwife in early labour, only 36% of women who wrote free-text comments considered the advice  
34  
35 appropriate.  
36

## 37 38 **DISCUSSION**

39  
40 The findings of this study suggest that there is considerable variation in women's experience of early  
41  
42 labour by sociodemographic characteristics. Although the differences by parity are to be expected,  
43  
44 the significantly increased worry among BME women is more surprising. However, it confirms the  
45  
46 findings of a previous study which found that ethnic minority women were more likely to report high  
47  
48 levels of worry about almost all aspects of birth, irrespective of parity and residence in an area of  
49  
50 deprivation.(32) After adjusting for parity, ethnicity and IMD, women aged 20-24 years were also  
51  
52 more likely to be worried about not knowing when labour would start and, again, this is consistent  
53  
54 with earlier research.(22) Women in this age group were also significantly less likely to feel that they  
55  
56  
57

1  
2  
3 received appropriate advice when they phoned a midwife or the hospital. This may reflect a  
4  
5 perception in this group that they are viewed as problematic and immature by health care  
6  
7 professionals.(33)  
8

9  
10 Primiparous women who were not able to attend NHS antenatal classes, either because they were  
11  
12 not offered or because they were booked up, were significantly more likely to be very worried about  
13  
14 not knowing when labour would start. This finding persisted after adjustment for sociodemographic  
15  
16 characteristics. This is consistent with the findings of a Danish randomised controlled trial which  
17  
18 found that antenatal education in small groups increased women's confidence in their ability to cope  
19  
20 at home during labour.(34) However, the women who were unable to access NHS antenatal  
21  
22 education in the current study were also significantly less likely to have planned their pregnancy or  
23  
24 to have booked before 10 weeks. Thus, they may have been more worried generally.  
25

26  
27 The free-text comments relating to women's experience of early labour were entirely negative. This  
28  
29 partly reflects the propensity for respondents to write additional comments when they have an issue  
30  
31 about which they would like to comment or complain.(29) To put it into context, over three-quarters  
32  
33 of women contacting a midwife or hospital at the start of labour reported receiving appropriate  
34  
35 advice but the corresponding proportion for women who wrote free-text responses on this topic  
36  
37 was just over a third. The main themes related to women's perceptions of staff assumptions and  
38  
39 attitudes, and not being allowed to come to hospital or stay, and these resonate strongly with earlier  
40  
41 studies.(2, 16-18, 20, 35) In particular, the study by Spiby et al (2014)(20) used focus groups to  
42  
43 understand the views of UK midwives dealing with women in early labour. They found that some  
44  
45 midwives held negative perceptions and stereotypes of women and labelled them accordingly.  
46  
47 Studies which analysed this subject from women's perspectives underscored the importance to  
48  
49 women of arriving at the hospital at the 'right time', the distress associated with being sent home,  
50  
51 and the impact of having a caring or uncaring midwife, of being believed.(2, 16) The neglect felt by  
52  
53  
54  
55  
56  
57  
58  
59  
60

1  
2  
3 some women at this time echoes the results of a study of women's experience of the early phase of  
4  
5 induction of labour.(36)  
6

7  
8 The other two themes that arose in this study related to parity and the perceived consequences for  
9  
10 women of poor early labour care. Parity is not mentioned in the literature although some studies  
11  
12 only included primiparous women.(12, 14, 17, 18) In this study, the issues facing primiparous and  
13  
14 multiparous women differed: primiparous women wanted more support and reassurance whereas  
15  
16 multiparous women, having already experienced labour, remembered how it felt and were  
17  
18 sometimes angry at not being believed. Some women perceived negative consequences resulting  
19  
20 from inaccurate diagnosis of labour. These included a lack of time for pain relief, medication and a  
21  
22 perception of delayed attachment to their baby, also women who thought that an operative delivery  
23  
24 may have been avoided had early labour been better managed. Although this latter outcome has  
25  
26 been demonstrated to result from admission in early labour,(1, 2) no qualitative studies have  
27  
28 reported on this.  
29

30  
31 A strength of this study is that it was based on a large random sample of births in England and uses  
32  
33 both quantitative and qualitative data from the same primiparous and multiparous women.  
34

35  
36 Limitations include the 47% response rate with under-representation of young women, those born  
37  
38 outside the UK, and women resident in deprived areas.(27) However, 16% of respondents were  
39  
40 BME, 17% left full-time education aged 16 years or less, 20% were resident in the most deprived  
41  
42 quintile, and 13% did not have a partner at the time of the survey. Similarly, the free-text comments  
43  
44 were disproportionately from primiparous, more educated women, and those resident in the least  
45  
46 deprived quintile. However, qualitative research aims to be transferable rather than generalisable  
47  
48 and the characteristics of women who wrote free-text comments are shown in Table 6. Moreover,  
49  
50 the findings are consistent with those of other studies and the numbers of women, even in minority  
51  
52 groups, are substantial. A further limitation of the quantitative data is that they are entirely based  
53  
54  
55  
56  
57  
58  
59  
60

1  
2  
3 on women's perception and recall of events, which may be inaccurate. However, recall of salient  
4  
5 events in childbirth is generally good.(37, 38)  
6

## 7 8 **Conclusions and implications for practice** 9

10 These findings reinforce those of other studies stressing the importance of providing reassurance to  
11 women in early labour, taking care that women do not feel neglected or dismissed. In particular,  
12 young primiparous women and those from minority ethnic groups report greater worry about  
13 aspects of early labour than other women and require additional reassurance. Whilst most women  
14 who are not contracting strongly and regularly can be reassured that they can safely stay at home,  
15 some women labour very rapidly. The Norwegian midwives cited in the study by Eri et al (2011)(19)  
16 recommended that women come into hospital to be assessed and to see how their labour  
17 progresses. If they are not in active labour, they can then decide for themselves that they would be  
18 more comfortable at home and feel confident in going home.(19) A standalone triage unit for  
19 women in early labour, separate from the labour ward, would not be influenced by the workload  
20 there and could help women to have a more positive experience of early labour. This model may  
21 require additional resources to set up, but if it helps women to come into hospital in active labour, it  
22 may save resources overall.  
23  
24  
25  
26  
27  
28  
29  
30  
31  
32  
33  
34  
35  
36  
37

38 Antenatal education may have a role in improving women's and partners' knowledge and confidence  
39 in coping at home but a recent systematic review reported a lack of good evidence as to its  
40 effectiveness in promoting good obstetric and psychosocial outcomes more generally.(39) The  
41 maternity services should consider whether women's information needs are being met.  
42  
43  
44  
45  
46

47 In summary, most women were not particularly worried about early labour and most of those who  
48 contacted a midwife at this time felt that they received appropriate advice. However, some women  
49 clearly felt that their care at this time had been poor suggesting that this is an area where  
50 improvements could be made.  
51  
52  
53  
54  
55  
56  
57  
58  
59  
60

## ACKNOWLEDGEMENTS

Our particular thanks go to the women who completed the surveys and to Mark Gautrey and staff at the Office for National Statistics who were responsible for drawing the sample and managing the mailings. The Office for National Statistics provided data for the sampling frame but bear no responsibility for its analysis and interpretation.

## COMPETING INTERESTS

The authors declare that they have no competing interests.

## FUNDING

This paper reports on an independent study which is funded by the Policy Research Programme in the Department of Health. The views expressed are not necessarily those of the Department. The Department of Health was not involved in any aspect of the study.

## AUTHORS' CONTRIBUTIONS

JH initiated this study, conducted the analyses and drafted the manuscript. MR was the principal investigator for women's surveys and helped direct the analysis. Both authors revised the manuscript.

## DATA SHARING STATEMENT

Further analyses of these data are planned so data will not be shared until these are completed.

**REFERENCES**

1. National Institute for Health and Care Excellence. Intrapartum care for healthy women and babies 2014 [Available from: nice.org.uk/guidance/cg190].
2. Hanada N, Matsuki M, Ota E, Mori R. Psychosocial and educational interventions in latent phase or early labour for improving birth outcomes (Protocol). *Cochrane Db Syst Rev*. 2015(2).
3. Alehagen S, Wijma B, Lundberg U, Wijma K. Fear, pain and stress hormones during childbirth. *J Psychosom Obstet Gynaecol*. 2005;26(3):153-65.
4. Hemminki E, Simukka R. The timing of hospital admission and progress of labour. *Eur J Obstet Gynecol Reprod Biol*. 1986;22(1-2):85-94.
5. Holmes P, Oppenheimer LW, Wen SW. The relationship between cervical dilatation at initial presentation in labour and subsequent intervention. *BJOG*. 2001;108(11):1120-4.
6. Klein MC, Kelly A, Kaczorowski J, Grzybowski S. The effect of family physician timing of maternal admission on procedures in labour and maternal and infant morbidity. *J Obstet Gynaecol Can*. 2004;26(7):641-5.
7. Bailit JL, Dierker L, Blanchard MH, Mercer BM. Outcomes of women presenting in active versus latent phase of spontaneous labor. *Obstet Gynecol*. 2005;105(1):77-9.
8. Petersen A, Penz SM, Gross MM. Women's perception of the onset of labour and epidural analgesia: a prospective study. *Midwifery*. 2013;29(4):284-93.
9. Rahnama P, Ziaei S, Faghihzadeh S. Impact of early admission in labor on method of delivery. *Int J Gynaecol Obstet*. 2006;92(3):217-20.
10. Friedman E. *Labor: clinical evaluation and management*, 2nd ed. New York: Appleton-Century Crofts; 1978.
11. Cheyne H, Dowding DW, Hundley V. Making the diagnosis of labour: midwives' diagnostic judgement and management decisions. *J Adv Nurs*. 2006;53(6):625-35.
12. Janssen PA, Desmarais SL. Women's experience with early labour management at home vs. in hospital: a randomised controlled trial. *Midwifery*. 2013;29(3):190-4.
13. Hodnett ED, Stremler R, Willan AR, Weston JA, Lowe NK, Simpson KR, et al. Effect on birth outcomes of a formalised approach to care in hospital labour assessment units: international, randomised controlled trial. *BMJ*. 2008;337:a1021.
14. Cheyne H, Hundley V, Dowding D, Bland JM, McNamee P, Greer I, et al. Effects of algorithm for diagnosis of active labour: cluster randomised trial. *BMJ*. 2008;337:a2396.
15. Carlsson IM, Hallberg LR, Odberg Pettersson K. Swedish women's experiences of seeking care and being admitted during the latent phase of labour: a grounded theory study. *Midwifery*. 2009;25(2):172-80.
16. Eri TS, Bondas T, Gross MM, Janssen P, Green JM. A balancing act in an unknown territory: a metasynthesis of first-time mothers' experiences in early labour. *Midwifery*. 2015;31(3):e58-67.
17. Green JM, Spiby H, Hucknall C, Richardson Foster H. Converting policy into care: women's satisfaction with the early labour telephone component of the All Wales Clinical Pathway for Normal Labour. *J Adv Nurs*. 2012;68(10):2218-28.
18. Cappelletti G, Nespoli A, Fumagalli S, Borrelli SE. First-time mothers' experiences of early labour in Italian maternity care services. *Midwifery*. 2016;34:198-204.
19. Eri TS, Blystad A, Gjengedal E, Blaaka G. 'Stay home for as long as possible': midwives' priorities and strategies in communicating with first-time mothers in early labour. *Midwifery*. 2011;27(6):e286-92.
20. Spiby H, Walsh D, Green J, Crompton A, Bugg G. Midwives' beliefs and concerns about telephone conversations with women in early labour. *Midwifery*. 2014;30(9):1036-42.
21. Henderson J, Gao H, Redshaw M. Experiencing maternity care: the care received and perceptions of women from different ethnic groups. *BMC Pregnancy Childbirth*. 2013;13:196.
22. Henderson J, Redshaw M. Worries About Labor and Birth: A Population-Based Study of Outcomes for Young Primiparous Women. *Birth*. 2016;43(2):151-8.



23. Redshaw M, Henderson J. Who is actually asked about their mental health in pregnancy and the postnatal period? Findings from a national survey. *BMC Psychiatry*. 2016;16(1):322.
24. Lindquist A, Kurinczuk JJ, Redshaw M, Knight M. Experiences, utilisation and outcomes of maternity care in England among women from different socio-economic groups: findings from the 2010 National Maternity Survey. *BJOG*. 2015;122(12):1610-7.
25. Mander S, Miller YD. Perceived safety, quality and cultural competency of maternity care for culturally and linguistically diverse women in Queensland. *J Racial Ethn Health Disparities*. 2016;3(1):83-98.
26. Zadoroznyj M, Brodribb WE, Young K, Kruske S, Miller YD. 'I really needed help': What mothers say about their post-birth care in Queensland, Australia. *Women Birth*. 2015;28(3):246-51.
27. Redshaw M, Henderson J. Safely delivered: a national survey of women's experience of maternity care 2014. Oxford; 2015. Available at: <https://www.npeu.ox.ac.uk/reports/807-safely-delivered?highlight=YTo0OntpOjA7czo2OiJzYWZlbHkiO2k6MTtzOjk6ImRlbGl2ZXJlZCI7aToyO3M6MTA6lidkZWxpdmVyZWQiO2k6MztzOjE2OiJzYWZlbHkgZGVsaXZlcmVkljt9>
28. Redshaw M, Martin C, Rowe R, Hockley C. The Oxford Worries about Labour Scale: women's experience and measurement characteristics of a measure of maternal concern about labour and birth. *Psychol Health Med*. 2009;14(3):354-66.
29. Garcia J, Evans J, Redshaw M. "Is there anything else you would like to tell us?" - methodological issues in the use of free-text comments from postal surveys. *Qual Quant*. 2004;38:113-25.
30. Golafshani N. Understanding reliability and validity in qualitative research. *Qual Rep*. 2003;8(4):597-607.
31. Henderson J, Redshaw M. Change over time in women's views and experiences of maternity care in England, 1995-2014: A comparison using survey data. *Midwifery*. 2017;44:35-40.
32. Redshaw M, Heikkila K. Ethnic differences in women's worries about labour and birth. *Ethn Health*. 2011;16(3):213-23.
33. Redshaw M, Miller YD, Hennegan J. Young women's experiences as consumers of maternity care in Queensland. *Birth*. 2014;41(1):56-63.
34. Brixval CS, Axelsen SF, Thygesen LC, Due P, Koushede V. Antenatal education in small classes may increase childbirth self-efficacy: Results from a Danish randomised trial. *Sex Reprod Healthc*. 2016;10:32-4.
35. Marowitz A. Caring for women in early labor: can we delay admission and meet women's needs? *J Midwifery Womens Health*. 2014;59(6):645-50.
36. Henderson J, Redshaw M. Women's experience of induction of labor: a mixed methods study. *Acta Obstet Gynecol Scand*. 2013;92(10):1159-67.
37. Quigley MA, Hockley C, Davidson LL. Agreement between hospital records and maternal recall of mode of delivery: evidence from 12 391 deliveries in the UK Millennium Cohort Study. *BJOG*. 2007;114(2):195-200.
38. Bat-Erdene U, Metcalfe A, McDonald SW, Tough SC. Validation of Canadian mothers' recall of events in labour and delivery with electronic health records. *BMC Pregnancy Childbirth*. 2013;13 Suppl 1:S3.
39. Brixval CS, Axelsen SF, Laudemoller SG, Andersen SK, Due P, Koushede V. The effect of antenatal education in small classes on obstetric and psycho-social outcomes - a systematic review. *Syst Rev*. 2015;4:20.

Figure 1 – Numbers and proportions of women contacting midwife or hospital at the start of labour and resulting care (of the 3099 women who had neither induction of labour nor a planned caesarean section before the start of labour)

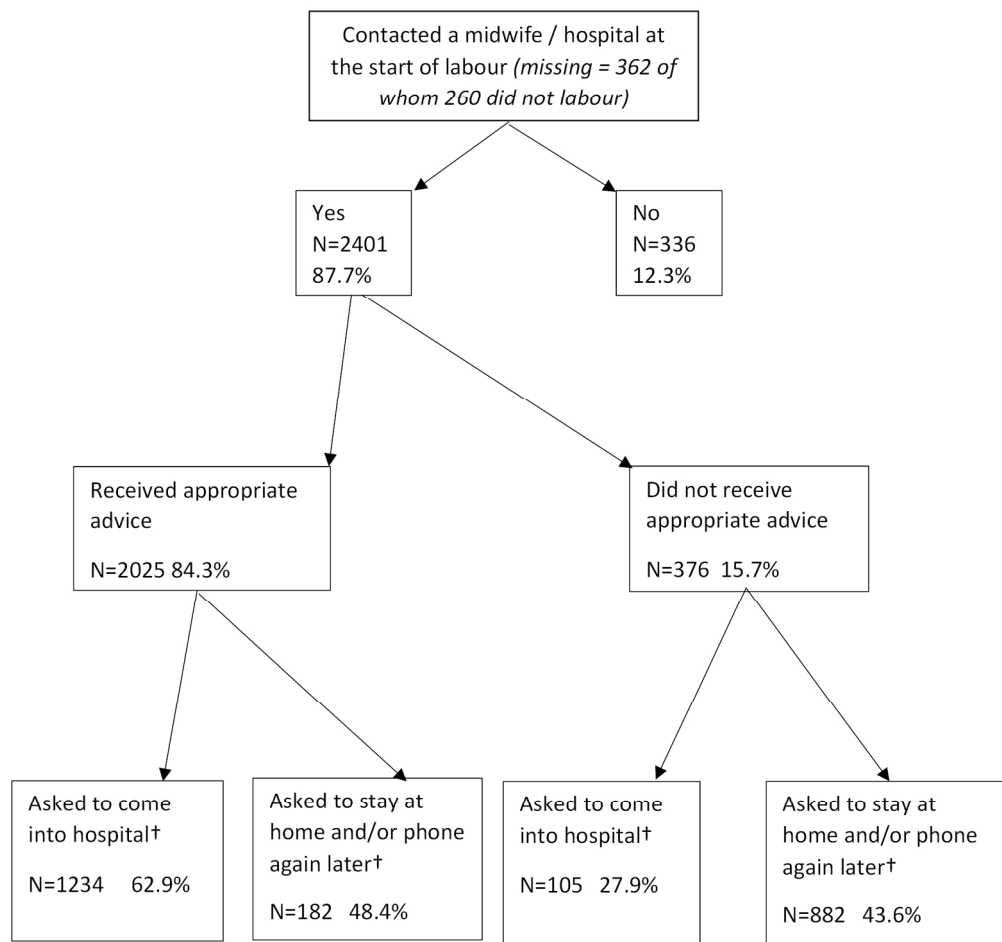

† Not exclusive categories

Figure 1 – Numbers and proportions of women contacting midwife or hospital at the start of labour and resulting care (of the 3099 women who had neither induction of labour nor a planned caesarean section before the start of labour)

163x180mm (300 x 300 DPI)

## Supplementary data on antenatal education

|                                                  | Offered AN classes |      | Attended NHS classes |               |                 |            | Paid for AN classes |      |     |      |     |      |
|--------------------------------------------------|--------------------|------|----------------------|---------------|-----------------|------------|---------------------|------|-----|------|-----|------|
|                                                  | N                  | %    | Yes                  | No, booked up | No, not offered | Not wanted | No.                 | %    | N   | %    |     |      |
| <b>Maternal age (years)</b>                      |                    |      |                      |               |                 |            |                     |      |     |      |     |      |
| <20                                              | 57                 | 73.1 | 20                   | 25.6          | 4               | 5.1        | 14                  | 17.9 | 28  | 35.9 | 0   | 0.0  |
| 20-24                                            | 240                | 68.0 | 97                   | 28.0          | 13              | 3.8        | 75                  | 21.7 | 115 | 33.2 | 11  | 3.2  |
| 25-29                                            | 586                | 70.3 | 289                  | 35.1          | 15              | 1.8        | 165                 | 20.0 | 235 | 28.6 | 82  | 9.9  |
| 30-34                                            | 700                | 64.0 | 314                  | 29.4          | 19              | 1.8        | 266                 | 24.9 | 315 | 29.5 | 200 | 18.4 |
| 35-39                                            | 342                | 59.6 | 144                  | 25.9          | 10              | 1.8        | 149                 | 26.8 | 163 | 29.3 | 106 | 18.5 |
| 40+                                              | 61                 | 52.1 | 23                   | 21.3          | 2               | 1.9        | 35                  | 32.4 | 30  | 27.8 | 19  | 16.4 |
| Total                                            | 1986               | 65.1 | 887                  | 29.8          | 63              | 2.1        | 704                 | 23.6 | 886 | 29.7 | 418 | 13.8 |
|                                                  |                    | ***  |                      |               |                 |            |                     |      | **  |      |     | ***  |
| <b>Parity</b>                                    |                    |      |                      |               |                 |            |                     |      |     |      |     |      |
| Primiparous                                      | 1218               | 83.5 | 725                  | 50.0          | 43              | 3.0        | 158                 | 10.9 | 286 | 19.7 | 336 | 23.1 |
| Multiparous                                      | 717                | 47.4 | 130                  | 9.0           | 18              | 1.2        | 531                 | 36.6 | 582 | 40.1 | 72  | 4.8  |
| Total                                            | 1935               | 65.2 | 855                  | 29.5          | 61              | 2.1        | 689                 | 23.7 | 868 | 29.9 | 408 | 13.8 |
|                                                  |                    | ***  |                      |               |                 |            |                     |      | *** |      |     | ***  |
| <b>Index of multiple deprivation (quintiles)</b> |                    |      |                      |               |                 |            |                     |      |     |      |     |      |
| 1 (least deprived)                               | 393                | 66.2 | 176                  | 30.0          | 10              | 1.7        | 137                 | 23.4 | 160 | 27.3 | 129 | 21.9 |
| 2                                                | 421                | 70.6 | 190                  | 33.0          | 14              | 2.4        | 113                 | 19.6 | 165 | 28.6 | 112 | 19.0 |
| 3                                                | 408                | 65.6 | 202                  | 33.3          | 13              | 2.1        | 149                 | 24.5 | 161 | 26.5 | 86  | 14.0 |
| 4                                                | 410                | 63.2 | 181                  | 28.7          | 12              | 1.9        | 154                 | 24.4 | 202 | 32.0 | 63  | 9.7  |
| 5 (most deprived)                                | 353                | 59.9 | 138                  | 23.8          | 14              | 2.4        | 151                 | 26.0 | 198 | 34.1 | 28  | 4.8  |
| Total                                            | 1985               | 65.1 | 887                  | 29.8          | 63              | 2.1        | 704                 | 23.6 | 886 | 29.7 | 418 | 13.8 |
|                                                  |                    | **   |                      |               |                 |            |                     |      | **  |      |     | ***  |
| <b>Black or minority ethnic group</b>            |                    |      |                      |               |                 |            |                     |      |     |      |     |      |
| No                                               | 1656               | 66.8 | 736                  | 30.5          | 46              | 1.9        | 558                 | 23.1 | 732 | 30.3 | 366 | 14.9 |
| Yes                                              | 282                | 57.9 | 125                  | 25.9          | 14              | 2.9        | 131                 | 27.1 | 130 | 26.9 | 45  | 9.3  |

1  
2  
3  
4  
5  
6  
7  
8  
9  
10  
11  
12  
13  
14  
15  
16  
17  
18  
19  
20  
21  
22  
23  
24  
25  
26  
27  
28  
29  
30  
31  
32  
33  
34  
35  
36  
37  
38  
39  
40  
41  
42  
43  
44  
45  
46

|       |      |             |     |      |    |     |     |      |     |           |     |            |
|-------|------|-------------|-----|------|----|-----|-----|------|-----|-----------|-----|------------|
| Total | 1938 | 65.4<br>*** | 861 | 29.7 | 60 | 2.1 | 689 | 23.8 | 862 | 29.7<br>* | 411 | 14.0<br>** |
|-------|------|-------------|-----|------|----|-----|-----|------|-----|-----------|-----|------------|

Missing values: Offered AN classes 48; Attended AN classes 118; Paid for private classes 69

**Association between worry about aspects of early labour and attendance at antenatal classes (Primips only)**

|                                                                  | Attended AN classes |      | Classes all booked up or not offered |      | Did not wish to attend or did not attend for other reason |      |
|------------------------------------------------------------------|---------------------|------|--------------------------------------|------|-----------------------------------------------------------|------|
|                                                                  | No.                 | %    | No.                                  | %    | No.                                                       | %    |
| Very worried about not knowing when labour would start (p=0.002) | 136                 | 12.4 | 57                                   | 19.8 | 90                                                        | 12.3 |
| Very worried about getting to hospital in time (NS)              | 94                  | 8.5  | 35                                   | 12.3 | 68                                                        | 9.3  |

**Logistic regression** on feeling very worried about not knowing when labour would start adjusted for age, IMD, and ethnicity

|                                                           | OR (95% CI)       |
|-----------------------------------------------------------|-------------------|
| Attended AN classes                                       | 1                 |
| Classes all booked up or not offered                      | 1.58 (1.10, 2.25) |
| Did not wish to attend or did not attend for other reason | 0.94 (0.70, 1.26) |

## STROBE Statement—checklist of items that should be included in reports of observational studies

|                              | Item No | Recommendation                                                                                                                                                                                                                                                                                                                                                                                                                                                                                                           | Page |
|------------------------------|---------|--------------------------------------------------------------------------------------------------------------------------------------------------------------------------------------------------------------------------------------------------------------------------------------------------------------------------------------------------------------------------------------------------------------------------------------------------------------------------------------------------------------------------|------|
| <b>Title and abstract</b>    | 1       | (a) Indicate the study's design with a commonly used term in the title or the abstract                                                                                                                                                                                                                                                                                                                                                                                                                                   | 1    |
|                              |         | (b) Provide in the abstract an informative and balanced summary of what was done and what was found                                                                                                                                                                                                                                                                                                                                                                                                                      | 2    |
| <b>Introduction</b>          |         |                                                                                                                                                                                                                                                                                                                                                                                                                                                                                                                          |      |
| Background/rationale         | 2       | Explain the scientific background and rationale for the investigation being reported                                                                                                                                                                                                                                                                                                                                                                                                                                     | 4-6  |
| Objectives                   | 3       | State specific objectives, including any prespecified hypotheses                                                                                                                                                                                                                                                                                                                                                                                                                                                         | 6    |
| <b>Methods</b>               |         |                                                                                                                                                                                                                                                                                                                                                                                                                                                                                                                          |      |
| Study design                 | 4       | Present key elements of study design early in the paper                                                                                                                                                                                                                                                                                                                                                                                                                                                                  | 6    |
| Setting                      | 5       | Describe the setting, locations, and relevant dates, including periods of recruitment, exposure, follow-up, and data collection                                                                                                                                                                                                                                                                                                                                                                                          | 6    |
| Participants                 | 6       | (a) <i>Cohort study</i> —Give the eligibility criteria, and the sources and methods of selection of participants. Describe methods of follow-up<br><i>Case-control study</i> —Give the eligibility criteria, and the sources and methods of case ascertainment and control selection. Give the rationale for the choice of cases and controls<br><i>Cross-sectional study</i> —Give the eligibility criteria, and the sources and methods of selection of participants                                                   | 6    |
|                              |         | (b) <i>Cohort study</i> —For matched studies, give matching criteria and number of exposed and unexposed<br><i>Case-control study</i> —For matched studies, give matching criteria and the number of controls per case                                                                                                                                                                                                                                                                                                   |      |
| Variables                    | 7       | Clearly define all outcomes, exposures, predictors, potential confounders, and effect modifiers. Give diagnostic criteria, if applicable                                                                                                                                                                                                                                                                                                                                                                                 | 6-7  |
| Data sources/<br>measurement | 8*      | For each variable of interest, give sources of data and details of methods of assessment (measurement). Describe comparability of assessment methods if there is more than one group                                                                                                                                                                                                                                                                                                                                     | 6-7  |
| Bias                         | 9       | Describe any efforts to address potential sources of bias                                                                                                                                                                                                                                                                                                                                                                                                                                                                | 7    |
| Study size                   | 10      | Explain how the study size was arrived at                                                                                                                                                                                                                                                                                                                                                                                                                                                                                | 6    |
| Quantitative variables       | 11      | Explain how quantitative variables were handled in the analyses. If applicable, describe which groupings were chosen and why                                                                                                                                                                                                                                                                                                                                                                                             | 7    |
| Statistical methods          | 12      | (a) Describe all statistical methods, including those used to control for confounding<br>(b) Describe any methods used to examine subgroups and interactions<br>(c) Explain how missing data were addressed<br>(d) <i>Cohort study</i> —If applicable, explain how loss to follow-up was addressed<br><i>Case-control study</i> —If applicable, explain how matching of cases and controls was addressed<br><i>Cross-sectional study</i> —If applicable, describe analytical methods taking account of sampling strategy | 7    |
|                              |         | (e) Describe any sensitivity analyses                                                                                                                                                                                                                                                                                                                                                                                                                                                                                    |      |

Continued on next page

1  
2  
3  
4  
5  
6  
7  
8  
9  
10  
11  
12  
13  
14  
15  
16  
17  
18  
19  
20  
21  
22  
23  
24  
25  
26  
27  
28  
29  
30  
31  
32  
33  
34  
35  
36  
37  
38  
39  
40  
41  
42  
43  
44  
45  
46  
47  
48  
49  
50  
51  
52  
53  
54  
55  
56  
57  
58  
59  
60**Results**

|                  |     |                                                                                                                                                                                                                                                                                                                                                                                                               |                  |
|------------------|-----|---------------------------------------------------------------------------------------------------------------------------------------------------------------------------------------------------------------------------------------------------------------------------------------------------------------------------------------------------------------------------------------------------------------|------------------|
| Participants     | 13* | (a) Report numbers of individuals at each stage of study—eg numbers potentially eligible, examined for eligibility, confirmed eligible, included in the study, completing follow-up, and analysed<br>(b) Give reasons for non-participation at each stage<br>(c) Consider use of a flow diagram                                                                                                               | 7-8<br><br>Fig 1 |
| Descriptive data | 14* | (a) Give characteristics of study participants (eg demographic, clinical, social) and information on exposures and potential confounders<br>(b) Indicate number of participants with missing data for each variable of interest<br>(c) <i>Cohort study</i> —Summarise follow-up time (eg, average and total amount)                                                                                           | Tables 1-3       |
| Outcome data     | 15* | <i>Cohort study</i> —Report numbers of outcome events or summary measures over time<br><i>Case-control study</i> —Report numbers in each exposure category, or summary measures of exposure<br><i>Cross-sectional study</i> —Report numbers of outcome events or summary measures                                                                                                                             | Tables 1-3       |
| Main results     | 16  | (a) Give unadjusted estimates and, if applicable, confounder-adjusted estimates and their precision (eg, 95% confidence interval). Make clear which confounders were adjusted for and why they were included<br>(b) Report category boundaries when continuous variables were categorized<br>(c) If relevant, consider translating estimates of relative risk into absolute risk for a meaningful time period | Tables 4-5       |
| Other analyses   | 17  | Report other analyses done—eg analyses of subgroups and interactions, and sensitivity analyses                                                                                                                                                                                                                                                                                                                |                  |

**Discussion**

|                  |    |                                                                                                                                                                            |       |
|------------------|----|----------------------------------------------------------------------------------------------------------------------------------------------------------------------------|-------|
| Key results      | 18 | Summarise key results with reference to study objectives                                                                                                                   | 20    |
| Limitations      | 19 | Discuss limitations of the study, taking into account sources of potential bias or imprecision. Discuss both direction and magnitude of any potential bias                 | 22    |
| Interpretation   | 20 | Give a cautious overall interpretation of results considering objectives, limitations, multiplicity of analyses, results from similar studies, and other relevant evidence | 20-22 |
| Generalisability | 21 | Discuss the generalisability (external validity) of the study results                                                                                                      | 22    |

**Other information**

|         |    |                                                                                                                                                               |    |
|---------|----|---------------------------------------------------------------------------------------------------------------------------------------------------------------|----|
| Funding | 22 | Give the source of funding and the role of the funders for the present study and, if applicable, for the original study on which the present article is based | 23 |
|---------|----|---------------------------------------------------------------------------------------------------------------------------------------------------------------|----|

\*Give information separately for cases and controls in case-control studies and, if applicable, for exposed and unexposed groups in cohort and cross-sectional studies.

**Note:** An Explanation and Elaboration article discusses each checklist item and gives methodological background and published examples of transparent reporting. The STROBE checklist is best used in conjunction with this article (freely available on the Web sites of PLoS Medicine at <http://www.plosmedicine.org/>, Annals of Internal Medicine at <http://www.annals.org/>, and Epidemiology at <http://www.epidem.com/>). Information on the STROBE Initiative is available at [www.strobe-statement.org](http://www.strobe-statement.org).

# BMJ Open

## Sociodemographic differences in women's experience of early labour care: a mixed methods study

|                                 |                                                                                                                           |
|---------------------------------|---------------------------------------------------------------------------------------------------------------------------|
| Journal:                        | <i>BMJ Open</i>                                                                                                           |
| Manuscript ID                   | bmjopen-2017-016351.R2                                                                                                    |
| Article Type:                   | Research                                                                                                                  |
| Date Submitted by the Author:   | 05-Apr-2017                                                                                                               |
| Complete List of Authors:       | Henderson, Jane; NPEU, Nuffield Department of Population Health<br>Redshaw, Maggie; NPEU, Department of Population Health |
| <b>Primary Subject Heading</b>: | Obstetrics and gynaecology                                                                                                |
| Secondary Subject Heading:      | Epidemiology                                                                                                              |
| Keywords:                       | OBSTETRICS, Maternal medicine < OBSTETRICS, EPIDEMIOLOGY                                                                  |
|                                 |                                                                                                                           |

SCHOLARONE™  
Manuscripts

Peer review only

1  
2  
3  
4  
5  
6  
7  
8  
9  
10 **Sociodemographic differences in women's experience**  
11 **of early labour care: a mixed methods study**  
12  
13

14  
15  
16 Jane Henderson BSc(Hons) MSc PhD\*

17  
18 Maggie Redshaw BA PhD CPsychol  
19

20  
21  
22 Policy Research Unit in Maternal Health and Care,  
23

24  
25 National Perinatal Epidemiology Unit,  
26

27  
28 Nuffield Department of Population Health,  
29

30  
31 University of Oxford,  
32

33  
34 Old Road Campus,  
35

36  
37 Old Road,  
38

39  
40 Oxford, UK  
41

42  
43 \* Corresponding author  
44

45  
46 Tel: 01865 289758; Fax: 01865 289701  
47

48  
49 Email: [jane.henderson@npeu.ox.ac.uk](mailto:jane.henderson@npeu.ox.ac.uk)  
50

51  
52 Email: [maggie.redshaw@npeu.ox.ac.uk](mailto:maggie.redshaw@npeu.ox.ac.uk)  
53

54  
55 Word count: 4850  
56  
57  
58  
59  
60



## Abstract

Objectives: To explore women's experiences of early labour care focussing on sociodemographic differences, and to examine the effect of antenatal education, using mixed methods.

Setting: England, 2014.

Participants: Women who completed postal questionnaires about their experience of maternity care, including questions about antenatal education, early labour and sociodemographic factors, included space for free-text comments.

Outcome measures: Worries about labour, contact with midwives in early labour and subsequent care.

Methods: This study was based on secondary analysis of a national maternity survey carried out in England in 2014. Quantitative data were analysed using descriptive statistics and binary logistic regression, qualitative data were analysed using a thematic content analytic approach.

Results: Completed questionnaires were received from 4578 women (47% response rate). There were significant differences by sociodemographic factors, particularly ethnicity, in women's worries about early labour. Compared to White women, women from Black or minority ethnic groups had an adjusted Odds ratio of 1.93 (95% confidence interval 1.56, 2.39) of feeling worried about not knowing when labour would start. Among women who contacted a midwife at the start of labour, 84% perceived their advice as appropriate, more in older and multiparous women. Overall, 64% of women were asked to come in to hospital at this time, more in multiparous women (adjusted Odds ratio 1.63, 95% confidence interval 1.35, 1.96). Those who did not have access to antenatal education experienced greater worry about early labour. Five themes emerged from the qualitative analysis: '*Differentiating between early and active labour*', '*Staff attitudes*', '*Not being allowed...*', '*Previous labours*', and '*Perceived consequences for women*'.

1  
2  
3 Conclusions: These findings reinforce the importance of providing reassurance to women in early  
4 labour, taking care that women do not feel neglected or dismissed. In particular, primiparous and  
5 ethnic minority women reported greater worry about early labour and require additional  
6 reassurance.  
7  
8  
9  
10

## 11 **Article summary**

### 12 ***Strengths and limitations of the study***

- 13 • Large study based on random sample of birth registrations in England.
- 14 • Both quantitative and qualitative data from women relating to early labour.
- 15 • Response rate of 47% makes generalisation difficult.
- 16 • Respondents, especially those who wrote free-text comments, predominantly primiparous,  
17 educated, and resident in less deprived areas.  
18  
19  
20  
21  
22  
23  
24  
25  
26  
27  
28  
29  
30  
31  
32  
33  
34  
35  
36  
37  
38  
39  
40  
41  
42  
43  
44  
45  
46  
47  
48  
49  
50  
51  
52  
53  
54  
55  
56  
57  
58  
59  
60

## INTRODUCTION

Early labour, also known as the latent phase, has been defined in a number of different ways but the National Institute for Health and Clinical Excellence (NICE) defines it as a period of time when there are painful contractions and some cervical change.(1) Early labour is usually a slow process during which women may feel distress and anxiety, and lose confidence in their ability to cope.(2) The resulting stress hormones may counter the effects of oxytocin and slow the progress of labour(3) resulting in further anxiety and distress.

Many observational studies have noted that admission to hospital prior to active labour increases the risk of oxytocin augmentation, epidural analgesia and caesarean section.(4-9) Health professionals therefore strongly recommend to women that they stay home as long as possible, until contractions are as frequent as three in ten minutes. This cut-off is based on a graphic approach developed by Friedman in the 1950s.(10) However, for women, the negative effects of staying at home in pain include confusion, anger and resentment, feeling neglected, unsupported and anxious.(2) It has been estimated that between 30% and 45% of women are admitted to hospital prior to active labour.(11, 12)

A randomised trial of an intervention providing additional support to women at home during early labour resulted in more admissions in active labour, reduced use of analgesia, reduced neonatal morbidity, and increased maternal satisfaction although emotional wellbeing and distress did not differ between the groups.(12) Other studies have found no significant benefit associated with structured care involving one-to-one care, positioning techniques, and positive imagery in early labour,(13) or use of an algorithm for defining active labour based on presence of painful, regular, moderate or strong contractions and either cervical effacement and dilation of at least 3cm, spontaneous rupture of membranes, or a 'show'.(14)

Several studies have used qualitative techniques to examine women's views and experience of care in early labour.(15-18) The findings of these studies reflect women's uncertainty and anxiety about

1  
2  
3 presenting at hospital at the right time, worry about being sent home if they arrive too early, their  
4  
5 need for validation, the pressure as well as support provided by friends and family, surprise and  
6  
7 consternation regarding the intensity of pain in early labour, and fatigue resulting in reduced ability  
8  
9 to cope. Other qualitative studies have examined the care of women in early labour from the  
10  
11 midwives' perspective.(19, 20) These stress the importance of providing reassurance to the woman  
12  
13 and her family and normalising the situation. However, they differed in overall paradigm which may  
14  
15 reflect differences in the organisation of care in Norway and the UK. The Norwegian study(19)  
16  
17 acknowledged that some women labour quickly and clinical judgement on the phone is necessarily  
18  
19 limited. These midwives believed that it was best for women to come to hospital for assessment if  
20  
21 they wished and then to feel sufficiently informed and empowered to make the decision to return  
22  
23 home if they were not in active labour. In contrast, the midwives in the UK study(20) stressed the  
24  
25 importance of the midwives' role as 'gatekeeper' acknowledging that they had different priorities  
26  
27 from the women. They reported that they could tell from a woman's voice, or through intuition,  
28  
29 whether she was in active labour. Moreover, some midwives used trivialising language to describe  
30  
31 women in early labour such as 'frequent flyers'. They acknowledged that although labour ward  
32  
33 workload should not take precedence over women's experience, it often did.(20)  
34  
35  
36

37  
38 Only one study used quantitative techniques to explore women's experience of early labour.(17)  
39  
40 They reported that 46% of women were aware of the expectation that they would stay at home  
41  
42 during early labour, and that being made to feel unwelcome, not being treated with respect or as an  
43  
44 individual were associated with feeling dissatisfied with care in early labour. This was exacerbated if  
45  
46 they were sent home more than once without follow-up arrangements being made, or felt  
47  
48 discouraged from returning, especially if they felt that this was due to the unit being busy rather  
49  
50 than it being clinically appropriate.  
51  
52

53  
54 No studies have examined the early labour experiences of women from different sociodemographic  
55  
56 groups although evidence from other studies suggests that women from more disadvantaged groups  
57  
58  
59  
60

1  
2  
3 have poorer experience of maternity care.(21-26) The aims of this study were therefore (i) to explore  
4  
5 the experiences of early labour care, both quantitatively and qualitatively, among women with  
6  
7 different sociodemographic characteristics, and (ii) to determine whether women who attended  
8  
9 antenatal education were less worried about early labour and less likely to go to hospital early.  
10

## 11 12 **METHODS**

13  
14 This study involved secondary analysis of a national maternity survey carried out in England in  
15  
16 2014.(27) Ten thousand women were randomly selected from birth registration statistics by staff at  
17  
18 the Office for National Statistics (ONS) excluding those aged less than 16 years and those whose  
19  
20 baby had died. The questionnaire, together with a letter, information leaflet, and a sheet with a  
21  
22 single sentence in 18 non-English languages (providing a Freephone number for an interpreter),  
23  
24 encouraged women to complete the questionnaire and return it in a Freepost envelope. These were  
25  
26 sent to women at three months postpartum. The questionnaire could also be completed online.  
27  
28 Using a tailored reminder system, up to three reminders were sent as required.  
29  
30

31  
32 A mixed methods design was used with the questionnaire including both closed and open questions.  
33  
34 Women were asked about their experience of maternity care including early labour, and also asked  
35  
36 questions about sociodemographic characteristics and whether they attended antenatal classes.  
37  
38

39 Using a validated worries checklist they were asked a range of questions, including if, before labour  
40  
41 started, they were worried about not knowing when they would go into labour, and about getting to  
42  
43 the hospital in time (answer options: very, quite, not very, not at all worried).(28) Women who had a  
44  
45 labour were asked if they contacted a midwife or the hospital at the very start of their labour, and if  
46  
47 so, whether they felt that they were given appropriate advice and support. If they had contacted a  
48  
49 midwife or the hospital, they were asked about the response, that is, whether they were asked to  
50  
51 come into the hospital, stay at home, wait and phone again, or phone again if worried. We have  
52  
53 considered this as early labour care although we acknowledge that it may have also included women  
54  
55 in active labour. All data were necessarily based on women's perception and recall of events.  
56  
57  
58  
59  
60

1  
2  
3 There was space for free-text comment at the point in the questionnaire relating to early labour and  
4  
5 at the end. Women were also asked what they would like to tell other women about having a baby  
6  
7 in that hospital or unit. These free-text comments were the sole source of qualitative data.  
8  
9

10 ONS provided information about each woman's age group, country of birth, marital status, and an  
11  
12 area based measure, the Index of Multiple Deprivation (IMD) in quintiles, which enabled comparison  
13  
14 of responders and non-responders. In this study, IMD, ethnicity (White vs. Black or minority ethnic  
15  
16 group (BME)), maternal age in six categories, and parity (primiparous vs. multiparous) were included  
17  
18 as sociodemographic variables. Women who had an induction of labour or caesarean planned and  
19  
20 carried out before labour were excluded from the analysis.  
21  
22

23 A descriptive analysis was carried out using raw percentages to establish how sociodemographic  
24  
25 groups' experiences differed in their worries about early labour, whether they contacted a health  
26  
27 care professional in early labour and received appropriate advice. Differences were tested using the  
28  
29 chi-square statistic. As there was likely to be overlap between different sociodemographic factors,  
30  
31 binary logistic regression was used to estimate the extent of this, to determine the main drivers for  
32  
33 any differences seen, and to test the effect of antenatal education. Binary logistic regressions were  
34  
35 adjusted for each of the sociodemographic variables. All quantitative analyses were carried out in  
36  
37 Stata version 13.  
38  
39

40  
41 Free-text responses to the questions relating to care in early labour and at the end of the  
42  
43 questionnaire were analysed following the method of Garcia et al (2004).(29) Responses were  
44  
45 filtered using the keywords 'early', 'latent', 'sent home', 'come/came back', and 'return' then read  
46  
47 and selected if they referred to early labour. Comments were read and coded in an iterative process  
48  
49 by both authors, coding themes as they arose using a thematic content analytic approach. Where  
50  
51 differences in interpretation arose these were resolved by discussion and reference to the raw data.  
52  
53 Deviant cases were sought, and triangulation with quantitative data on satisfaction was used to test  
54  
55 the credibility and trustworthiness of the findings.(30)  
56  
57  
58  
59  
60

1  
2  
3 Ethical approval for the survey was obtained from the NRES committee for Yorkshire and The  
4  
5 Humber – Humber Bridge (REC reference 14/YH/0065). Written informed consent from participants  
6  
7 was not considered necessary; consent was implicit in completion and return of the questionnaire.  
8  
9

## 10 RESULTS

11  
12 Completed questionnaires were received from 4578 women representing a 47% usable response  
13  
14 rate. Of these 398 had a planned caesarean section carried out before labour had started, and 1081  
15  
16 had an induction of labour. These were excluded from the analyses leaving 3099 women. These  
17  
18 were 49% primiparous, 83% White, and 42% aged 30 years or more. Compared to non-respondents,  
19  
20 women who completed the questionnaire were significantly more likely to be older, married, living  
21  
22 in a less deprived area and born in the UK.(27)  
23  
24

### 25 Quantitative results

26  
27 The descriptive statistics shown in Table 1 indicate considerable differences in women's worries  
28  
29 about early labour and in their care at this time. Worry about knowing when labour would start was  
30  
31 significantly greater in primiparous women and those from BME groups. Worry about getting to  
32  
33 hospital in time was significantly greater in multiparous women and, again, those from BME groups.  
34  
35  
36 Overall, 88% of women contacted a midwife or the hospital at the start of labour (Table 2). This was  
37  
38 significantly less likely in women ages 40 years or more and in multiparous women. Overall, 84% of  
39  
40 women reported receiving appropriate advice at this time, with significantly more reporting this  
41  
42 among older and multiparous women. Women were more likely to consider the advice appropriate  
43  
44 if it included coming into hospital (Figure 1). Overall, two-thirds of women were eventually asked to  
45  
46 come in to the hospital to be assessed, but 48% were at some point asked to stay at home and  
47  
48 phone again later. This latter was significantly more common in primiparous women (Table 3).  
49  
50  
51  
52  
53  
54  
55  
56  
57  
58  
59  
60

Table 1 – Sociodemographic characteristics of women with worries about early labour

|                                                  | Worry about knowing when labour would start<br>(Missing=106) |      |                         |      | Worry about getting to hospital in time<br>(Missing=112) |      |                         |      |     |
|--------------------------------------------------|--------------------------------------------------------------|------|-------------------------|------|----------------------------------------------------------|------|-------------------------|------|-----|
|                                                  | Very/quite worried                                           |      | Not very/at all worried |      | Very/quite worried                                       |      | Not very/at all worried |      |     |
|                                                  | No.                                                          | %    | No.                     | %    | No.                                                      | %    | No.                     | %    |     |
| <b>Maternal age (years)</b>                      |                                                              |      |                         |      |                                                          |      |                         |      |     |
| <20                                              | 40                                                           | 51.9 | 37                      | 48.1 | 54                                                       | 69.2 | 24                      | 30.8 |     |
| 20-24                                            | 159                                                          | 46.2 | 185                     | 53.8 | 209                                                      | 60.6 | 136                     | 39.4 |     |
| 25-29                                            | 441                                                          | 53.3 | 386                     | 46.7 | 510                                                      | 61.6 | 318                     | 38.4 |     |
| 30-34                                            | 579                                                          | 54.0 | 494                     | 46.0 | 673                                                      | 62.9 | 397                     | 37.1 |     |
| 35-39                                            | 298                                                          | 53.2 | 262                     | 46.8 | 338                                                      | 61.1 | 215                     | 38.9 |     |
| 40+                                              | 61                                                           | 55.0 | 50                      | 45.0 | 71                                                       | 63.4 | 41                      | 36.6 |     |
| Total                                            | 1578                                                         | 52.7 | 1414                    | 47.3 | 1855                                                     | 62.1 | 1131                    | 37.9 |     |
| <i>Missing=1</i>                                 |                                                              |      |                         |      |                                                          |      |                         |      |     |
| <b>Parity</b>                                    |                                                              |      |                         |      |                                                          |      |                         |      |     |
| Primiparous                                      | 713                                                          | 49.3 | 733                     | 50.7 | 944                                                      | 65.4 | 499                     | 34.6 |     |
| Multiparous                                      | 834                                                          | 56.7 | 637                     | 43.3 | 866                                                      | 59.1 | 600                     | 40.9 |     |
| Total                                            | 1547                                                         | 53.0 | 1370                    | 47.0 | 1810                                                     | 62.2 | 1099                    | 37.8 | *** |
| <i>Missing=104</i>                               |                                                              |      |                         |      |                                                          |      |                         |      |     |
| <b>Index of multiple deprivation (quintiles)</b> |                                                              |      |                         |      |                                                          |      |                         |      |     |
| 1 (least deprived)                               | 322                                                          | 55.0 | 263                     | 45.0 | 370                                                      | 63.4 | 214                     | 36.6 |     |
| 2                                                | 315                                                          | 54.1 | 267                     | 45.9 | 367                                                      | 62.8 | 217                     | 37.2 |     |
| 3                                                | 329                                                          | 53.8 | 282                     | 46.2 | 381                                                      | 62.7 | 227                     | 37.3 |     |
| 4                                                | 317                                                          | 49.3 | 326                     | 50.7 | 389                                                      | 60.6 | 253                     | 39.4 |     |
| 5 (most deprived)                                | 296                                                          | 51.8 | 275                     | 48.2 | 348                                                      | 61.3 | 220                     | 38.7 |     |
| Total                                            | 1579                                                         | 52.8 | 1413                    | 47.2 | 1855                                                     | 62.1 | 1131                    | 37.9 |     |
| <i>Missing=1</i>                                 |                                                              |      |                         |      |                                                          |      |                         |      |     |
| <b>Black or minority ethnic group</b>            |                                                              |      |                         |      |                                                          |      |                         |      |     |
| No                                               | 1341                                                         | 55.0 | 1098                    | 45.0 | 1557                                                     | 63.7 | 886                     | 36.3 |     |
| Yes                                              | 195                                                          | 41.0 | 281                     | 59.0 | 251                                                      | 53.3 | 220                     | 46.7 |     |
| Total                                            | 1536                                                         | 52.7 | 1379                    | 47.3 | 1808                                                     | 62.0 | 1106                    | 38.0 | *** |
| <i>Missing=109</i>                               |                                                              |      |                         |      |                                                          |      |                         |      |     |

\*  $p < 0.05$  \*\*  $p < 0.01$  \*\*\*  $p < 0.001$



Table 2 – Sociodemographic characteristics of women contacting a health professional at the start of labour

|                                                  | Contacted a MW/hospital at start of labour |      |     |      |     | Received appropriate advice |      |     |      |     |
|--------------------------------------------------|--------------------------------------------|------|-----|------|-----|-----------------------------|------|-----|------|-----|
|                                                  | Yes                                        |      | No  |      |     | Yes                         |      | No  |      |     |
|                                                  | No.                                        | %    | No. | %    |     | No.                         | %    | No. | %    |     |
| <b>Maternal age (years)</b>                      |                                            |      |     |      |     |                             |      |     |      |     |
| <20                                              | 60                                         | 87.0 | 9   | 13.0 |     | 45                          | 75.0 | 15  | 25.0 |     |
| 20-24                                            | 294                                        | 91.0 | 29  | 9.0  |     | 224                         | 76.2 | 70  | 23.8 |     |
| 25-29                                            | 699                                        | 90.3 | 75  | 9.7  |     | 588                         | 84.1 | 111 | 15.9 |     |
| 30-34                                            | 846                                        | 86.6 | 131 | 13.4 |     | 722                         | 85.3 | 124 | 14.7 |     |
| 35-39                                            | 430                                        | 85.7 | 72  | 14.3 |     | 379                         | 88.1 | 51  | 11.9 |     |
| 40+                                              | 71                                         | 78.0 | 20  | 22.0 |     | 66                          | 93.0 | 5   | 7.0  |     |
| Total                                            | 2400                                       | 87.7 | 336 | 12.3 | **  | 2024                        | 84.3 | 376 | 15.7 | *** |
| <b>Parity</b>                                    |                                            |      |     |      |     |                             |      |     |      |     |
| Primiparous                                      | 1199                                       | 90.8 | 122 | 9.2  |     | 988                         | 82.4 | 211 | 17.6 |     |
| Multiparous                                      | 1139                                       | 84.6 | 207 | 15.4 |     | 985                         | 86.5 | 154 | 13.5 |     |
| Total                                            | 2338                                       | 87.7 | 329 | 12.3 | *** | 1973                        | 84.4 | 365 | 15.6 | **  |
| <b>Index of multiple deprivation (quintiles)</b> |                                            |      |     |      |     |                             |      |     |      |     |
| 1 (least deprived)                               | 475                                        | 88.8 | 60  | 11.2 |     | 411                         | 86.5 | 64  | 13.5 |     |
| 2                                                | 469                                        | 86.4 | 74  | 13.6 |     | 391                         | 83.4 | 78  | 16.6 |     |
| 3                                                | 496                                        | 89.0 | 61  | 11.0 |     | 422                         | 85.1 | 74  | 14.9 |     |
| 4                                                | 496                                        | 86.1 | 80  | 13.9 |     | 418                         | 84.3 | 78  | 15.7 |     |
| 5 (most deprived)                                | 464                                        | 88.4 | 61  | 11.6 |     | 383                         | 82.5 | 81  | 17.5 |     |
| Total                                            | 2400                                       | 87.7 | 336 | 12.3 |     | 2025                        | 84.4 | 375 | 15.6 |     |
| <b>Black or minority ethnic group</b>            |                                            |      |     |      |     |                             |      |     |      |     |
| No                                               | 1969                                       | 87.4 | 285 | 12.6 |     | 1661                        | 84.4 | 308 | 15.6 |     |
| Yes                                              | 375                                        | 89.7 | 43  | 10.3 |     | 314                         | 83.7 | 61  | 16.3 |     |
| Total                                            | 2344                                       | 87.7 | 328 | 12.3 |     | 1975                        | 84.3 | 369 | 15.7 |     |

\*  $p < 0.05$  \*\*  $p < 0.01$  \*\*\*  $p < 0.001$

Table 3 – If midwife or hospital contacted in early labour, woman asked to come in or stay home

|                                                  | If contacted MW:<br>stay home/phone again |      |           |      | If contacted MW:<br>come in to hospital |      |           |      |     |
|--------------------------------------------------|-------------------------------------------|------|-----------|------|-----------------------------------------|------|-----------|------|-----|
|                                                  | Yes<br>No.                                | %    | No<br>No. | %    | Yes<br>No.                              | %    | No<br>No. | %    |     |
| <b>Maternal age (years)</b>                      |                                           |      |           |      |                                         |      |           |      |     |
| <20                                              | 25                                        | 49.0 | 26        | 51.0 | 37                                      | 71.2 | 15        | 28.8 |     |
| 20-24                                            | 141                                       | 54.7 | 117       | 45.3 | 155                                     | 62.2 | 94        | 37.8 |     |
| 25-29                                            | 334                                       | 51.2 | 318       | 48.8 | 404                                     | 64.2 | 225       | 35.8 |     |
| 30-34                                            | 375                                       | 47.7 | 411       | 52.3 | 495                                     | 63.7 | 282       | 36.3 |     |
| 35-39                                            | 175                                       | 43.3 | 229       | 56.7 | 256                                     | 63.5 | 147       | 36.5 |     |
| 40+                                              | 27                                        | 39.7 | 41        | 60.3 | 42                                      | 60.0 | 28        | 40.0 |     |
| Total                                            | 1077                                      | 48.5 | 1142      | 51.5 | 1389                                    | 63.7 | 791       | 36.3 | *   |
| <b>Parity</b>                                    |                                           |      |           |      |                                         |      |           |      |     |
| Primiparous                                      | 641                                       | 57.6 | 472       | 42.4 | 617                                     | 58.8 | 433       | 41.2 |     |
| Multiparous                                      | 405                                       | 38.6 | 644       | 61.4 | 740                                     | 68.8 | 335       | 31.2 |     |
| Total                                            | 1046                                      | 48.4 | 1116      | 51.6 | 1357                                    | 63.9 | 768       | 36.1 | *** |
| <b>Index of multiple deprivation (quintiles)</b> |                                           |      |           |      |                                         |      |           |      |     |
| 1 (least deprived)                               | 233                                       | 52.0 | 215       | 48.0 | 260                                     | 60.3 | 171       | 39.7 |     |
| 2                                                | 228                                       | 52.4 | 207       | 47.6 | 258                                     | 61.3 | 163       | 38.7 |     |
| 3                                                | 221                                       | 47.3 | 246       | 52.7 | 277                                     | 62.1 | 169       | 37.9 |     |
| 4                                                | 208                                       | 46.2 | 242       | 53.8 | 314                                     | 67.8 | 149       | 32.2 |     |
| 5 (most deprived)                                | 186                                       | 44.4 | 233       | 55.6 | 281                                     | 66.9 | 139       | 33.1 |     |
| Total                                            | 1076                                      | 48.5 | 1143      | 51.5 | 1390                                    | 63.7 | 791       | 36.3 |     |
| <b>Black or minority ethnic group</b>            |                                           |      |           |      |                                         |      |           |      |     |
| No                                               | 886                                       | 48.7 | 933       | 51.3 | 1130                                    | 63.3 | 655       | 36.7 |     |
| Yes                                              | 170                                       | 49.0 | 177       | 51.0 | 223                                     | 65.2 | 119       | 34.8 |     |
| Total                                            | 1056                                      | 48.8 | 1110      | 51.2 | 1353                                    | 63.6 | 774       | 36.4 |     |

\*  $p < 0.05$  \*\*  $p < 0.01$  \*\*\*  $p < 0.001$

A series of binary logistic regressions was undertaken to understand the most important factors in the associations between sociodemographic variables and perceptions of early labour care (Tables 4 and 5). These confirmed the importance of parity and ethnicity for worries about going in to labour, and suggested that, when other adjusted for other variables, women aged 20-24 years experienced greater worry about not knowing when labour would start. Multiparous women and those aged 40 years or more were significantly less likely to contact a health care professional; and women aged

20-24 years were significantly less likely to feel that they had received appropriate advice (Table 5).

Parity and, marginally, residence in an area of deprivation remained associated with being asked to come into hospital (sometimes after being asked to wait or phone back later) after adjustment for the other sociodemographic factors.

**Table 4 – Binary logistic regression showing effects of sociodemographic factors on worries about going into labour, each variable adjusted for all others**

|                                      |                    | Very/quite worried about not knowing when labour would start |              | Very/quite worried about getting to hospital in time |              |
|--------------------------------------|--------------------|--------------------------------------------------------------|--------------|------------------------------------------------------|--------------|
|                                      |                    | OR                                                           | (95% CI)     | OR                                                   | (95% CI)     |
| <b>Maternal age (years)</b>          | <20                | 0.98                                                         | (0.60, 1.61) | 0.78                                                 | (0.46, 1.35) |
|                                      | 20-24              | 1.41                                                         | (1.09, 1.83) | 1.20                                                 | (0.92, 1.57) |
|                                      | 25-29              | 0.96                                                         | (0.79, 1.16) | 1.10                                                 | (0.90, 1.33) |
|                                      | 30-34              | 1                                                            |              | 1.00                                                 |              |
|                                      | 35-39              | 1.08                                                         | (0.88, 1.34) | 1.05                                                 | (0.85, 1.31) |
|                                      | 40+                | 0.91                                                         | (0.61, 1.37) | 0.89                                                 | (0.59, 1.35) |
| <b>Parity</b>                        | Primiparous        | 1.00                                                         |              | 1.00                                                 |              |
|                                      | Multiparous        | 0.72                                                         | (0.62, 0.84) | 1.30                                                 | (1.11, 1.52) |
| <b>Index of multiple deprivation</b> | 1 (least deprived) | 1.00                                                         |              | 1.00                                                 |              |
|                                      | 2                  | 0.94                                                         | (0.74, 1.19) | 0.96                                                 | (0.75, 1.23) |
|                                      | 3                  | 0.98                                                         | (0.77, 1.24) | 1.01                                                 | (0.80, 1.29) |
|                                      | 4                  | 1.13                                                         | (0.89, 1.42) | 1.00                                                 | (0.78, 1.27) |
|                                      | 5 (most deprived)  | 0.91                                                         | (0.71, 1.17) | 0.92                                                 | (0.71, 1.19) |
| <b>Ethnicity</b>                     | White              | 1.00                                                         |              | 1.00                                                 |              |
|                                      | BME                | 1.93                                                         | (1.56, 2.39) | 1.56                                                 | (1.26, 1.92) |

*BME Black or minority ethnic group*

#### **Antenatal education**

In the UK, women are given information and a registration form for antenatal classes at the time of booking. However, there has been a substantial decline in NHS (free) provision of antenatal classes.<sup>(31)</sup> It was postulated that worry about labour might be reduced in women who had attended antenatal education. Half of primiparous but only 9% of multiparous women attended NHS antenatal classes, a further 23% of primiparous and 5% of multiparous women attended non-NHS classes for which they paid. For *primiparous women only*, there was a strong association between

being unable to attend NHS classes, either because they were not offered or because they were booked up, and feeling 'very worried' about not knowing when labour would start (but not about getting to hospital in time). After adjustment for age, ethnicity and IMD, women who did not have access to antenatal classes had an Odds ratio of 1.58 (95% confidence interval 1.10-2.25) of being very worried about not knowing when labour would start. BME women were significantly less likely to attend antenatal classes due to not being offered them or them being booked up. However, those BME women who *did* attend classes were no less likely to be worried about these aspects of early labour. These data are shown in Supplementary data.

**Table 5 – Binary logistic regression showing combined effects of sociodemographic factors on experience of contacting midwife or hospital in early labour**

|                               |                    | Contacted HCP at start of labour |              | Received appropriate advice |              | Asked to come into hospital |              |
|-------------------------------|--------------------|----------------------------------|--------------|-----------------------------|--------------|-----------------------------|--------------|
|                               |                    | OR                               | (95% CI)     | OR                          | (95% CI)     | OR                          | (95% CI)     |
| Maternal age (years)          | <20                | 0.87                             | (0.39, 1.90) | 0.55                        | (0.28, 1.05) | 1.51                        | (0.79, 2.86) |
|                               | 20-24              | 1.40                             | (0.90, 2.19) | 0.57                        | (0.40, 0.81) | 0.95                        | (0.70, 1.30) |
|                               | 25-29              | 1.27                             | (0.93, 1.73) | 0.87                        | (0.65, 1.16) | 1.08                        | (0.86, 1.35) |
|                               | 30-34              | 1.00                             |              | 1.00                        |              | 1.00                        |              |
|                               | 35-39              | 0.97                             | (0.71, 1.34) | 1.17                        | (0.82, 1.67) | 0.93                        | (0.72, 1.21) |
|                               | 40+                | 0.56                             | (0.33, 0.96) | 2.70                        | (0.96, 7.58) | 0.77                        | (0.47, 1.28) |
| Parity                        | Primiparous        | 1.00                             |              | 1.00                        |              | 1.00                        |              |
|                               | Multiparous        | 0.59                             | (0.46, 0.75) | 1.24                        | (0.98, 1.58) | 1.63                        | (1.35, 1.96) |
| Index of multiple deprivation | 1 (least deprived) | 1.00                             |              | 1.00                        |              | 1.00                        |              |
|                               | 2                  | 0.75                             | (0.52, 1.09) | 0.84                        | (0.58, 1.21) | 1.09                        | (0.82, 1.45) |
|                               | 3                  | 0.95                             | (0.65, 1.39) | 0.99                        | (0.68, 1.43) | 1.11                        | (0.84, 1.47) |
|                               | 4                  | 0.70                             | (0.49, 1.02) | 0.95                        | (0.66, 1.38) | 1.34                        | (1.01, 1.79) |
|                               | 5 (most deprived)  | 0.91                             | (0.60, 1.36) | 0.88                        | (0.60, 1.29) | 1.23                        | (0.91, 1.66) |
| Ethnicity                     | White              | 1.00                             |              | 1.00                        |              | 1.00                        |              |
|                               | BME                | 1.39                             | (0.98, 1.99) | 0.89                        | (0.65, 1.23) | 1.00                        | (0.77, 1.29) |

*BME Black and minority ethnic group HCP Health care professional*

## Qualitative results

Fifty-nine women wrote free-text comments relating to early labour. Table 6 shows the characteristics of these women compared to survey respondents overall. They were disproportionately older, primiparous, more educated and resident in the least deprived quintiles but none of the differences was statistically significant. Table 7 shows the main themes that arose from the free-text comments relating to early labour. These were '*Differentiating between early and active labour*', '*Staff attitudes*', '*Not being allowed...*', '*Previous labours*', and '*Perceived consequences for women*'. Individual quotations are used to illustrate these themes.

**Table 6 – Sociodemographic characteristics of women who wrote free-text comments relating to early labour compared to all respondents**

|                                  |                                         | Women who wrote free-text comments relating to early labour |      | All women who completed the questionnaire |      |
|----------------------------------|-----------------------------------------|-------------------------------------------------------------|------|-------------------------------------------|------|
|                                  |                                         | N                                                           | %    | N                                         | %    |
| Maternal age (years)             | 16-24                                   | 7                                                           | 11.9 | 640                                       | 14.0 |
|                                  | 25-34                                   | 22                                                          | 37.3 | 2818                                      | 61.6 |
|                                  | 35 or more                              | 30                                                          | 50.8 | 1118                                      | 24.2 |
|                                  | Total                                   | 59                                                          | 100  | 4576                                      | 100  |
| Parity                           | Primiparous                             | 32                                                          | 56.1 | 2207                                      | 49.8 |
|                                  | Multiparous                             | 25                                                          | 43.9 | 2223                                      | 50.2 |
|                                  | Total                                   | 57                                                          | 100  | 4430                                      | 100  |
| Ethnicity                        | White                                   | 49                                                          | 84.5 | 3715                                      | 83.9 |
|                                  | BME                                     | 9                                                           | 15.5 | 713                                       | 16.1 |
|                                  | Total                                   | 58                                                          | 100  | 4428                                      | 100  |
| Index of multiple deprivation    | 1 (least deprived)                      | 15                                                          | 25.4 | 901                                       | 19.7 |
|                                  | 2                                       | 12                                                          | 20.3 | 867                                       | 18.9 |
|                                  | 3                                       | 13                                                          | 22.0 | 935                                       | 20.4 |
|                                  | 4                                       | 9                                                           | 15.2 | 978                                       | 21.4 |
|                                  | 5 (most deprived)                       | 10                                                          | 16.9 | 896                                       | 19.6 |
|                                  | Total                                   | 59                                                          | 100  | 4577                                      | 100  |
| Left FT education aged <16 years |                                         | 6                                                           | 10.3 | 757                                       | 16.9 |
|                                  | Left FT education aged 16 years or more | 53                                                          | 89.7 | 3727                                      | 83.1 |
|                                  | Total                                   | 59                                                          | 100  | 4484                                      | 100  |

*BME Black and minority ethnic group; FT full time*

### Differentiating between early and active labour

Women understood that to be credible and viewed by midwives as genuinely in labour, they had to meet certain criteria regarding frequency and duration of contractions. However, not all women in active labour met these criteria:

*Contractions started on a Weds, had the baby on a Saturday. Kept ringing the maternity ward to be told not to come in until I was 3-10-1 (3 contractions in 10 minutes, lasting 1 minute each).*

*That isn't going to apply to everyone and [one] should be invited into hospital. [Primip, IMD1, 25-29 yrs, white]*

*Went into hospital in labour 3 min contractions and sent home again as only 1.5 cm dilated - less than 2 hours later I gave birth, crowning in the hospital car park, head out in the elevator. This was very traumatic and wish they allowed me to stay instead of stranding me at home. [Primip, IMD5, 30-34 yrs, white]*

Women also reported that midwives judged from their voice and behaviour whether they were in active labour. Some women therefore deliberately 'acted' the part:

*When we went into labour with this baby, I phoned the hospital twice and both times they said I didn't sound like I was in labour and suggested I stay at home, [...] They made us feel a bit silly for coming into hospital, as I wasn't "screaming and shouting", they assumed I was only in early labour. [Multip, IMD3, 35-39 yrs, white]*

*[...] After my husband lied to the hospital about the time between contractions I was eventually told to come in. Although my waters hadn't broken I was already 6 cm dilated. [Primip, IMD2, 30-34 yrs, white]*

Table 7 – Main themes and examples arising from the qualitative analysis

| Themes                                          | Sub-themes                                                                                                                                                                                                                                                              | Examples                                                                                                                                                                                                                                                                                                                                                         |
|-------------------------------------------------|-------------------------------------------------------------------------------------------------------------------------------------------------------------------------------------------------------------------------------------------------------------------------|------------------------------------------------------------------------------------------------------------------------------------------------------------------------------------------------------------------------------------------------------------------------------------------------------------------------------------------------------------------|
| Differentiating between early and active labour | <p>'Rules' about contractions</p> <p>Behaviour of women in active labour</p> <p>Having to pretend/exaggerate about contractions</p>                                                                                                                                     | <p>[...] Called hospital 9 hours later, told midwife I had urge to push, still advised to stay home due to contraction frequency. Felt very uncomfortable, husband called 999, waters broke as soon as ambulance came and I began pushing at home. Decided to go to hospital by ambulance, baby born shortly after arrival. [Primip, IMD1, 25-29 yrs, white]</p> |
| Staff attitudes                                 | <p>Insensitive, rude, abrupt, dismissive, negative response</p> <p>Being made to feel foolish</p> <p>Feeling vindicated – women in active labour not early labour as staff had thought</p> <p>Received inappropriate advice: stay home, have bath, take paracetamol</p> | <p>I was distressed during my labour as one of the midwives was very patronising in telling me that my contractions weren't as painful as I was experiencing, she sent me home twice. [Primip, IMD5, 30-34 yrs, BME]</p>                                                                                                                                         |
| Not being allowed...                            | <p>To come in, to stay – sent home, unit busy</p> <p>Be examined/checked</p> <p>Having to beg for VE</p>                                                                                                                                                                | <p>I felt quite pushed back from the hospital when I phoned. I was bleeding (my show) and having regular pains but I just got told to stay at home and if I went through they would just send me away. [Primip, IMD5, 20-24 yrs, BME]</p>                                                                                                                        |
| Previous labours                                | <p>Primiparous women needing reassurance, being uncertain</p> <p>Multiparous women having experience, recognising active labour, being dismissed</p>                                                                                                                    | <p>When I went into labour with my 3rd child I called the labour ward and wanted to come into hospital but they wouldn't let me. I didn't feel like she was listening to me even though I said I labour quickly.</p>                                                                                                                                             |
| Perceived consequences for women                | <p>Rushed delivery - insufficient time for preparation &amp; pain relief</p> <p>Not a normal birth - Instrumental/operative delivery</p> <p>Upset - distress, delayed attachment to baby</p>                                                                            | <p>[...] Felt unhappy as hadn't had chance for pain relief option and baby had become distressed. Felt that I should have been kept in hospital when first went in or made to feel more welcome on phone. Not the way I wanted my labour to be and was worrying for me and my husband. [Primip, IMD1, 25-29 yrs, white]</p>                                      |

**Staff attitudes**

Many women perceived negative staff attitudes both on the phone and when attending the unit for assessment. Women were made to feel foolish by midwives who were insensitive, rude, abrupt and dismissive:

*[...] I had to scream/cry down the phone before she abruptly told me "you better come in then" not a pleasant experience. [Multip, IMD3, 30-34 yrs, white]*

Another common sub-theme was women feeling vindicated, the midwife having assumed that they were not in active labour, but upon examination, they were close to full dilatation:

*I knew I was further along than they assumed and insisted on an exam where they discovered I was 6cm and baby came 3 hours later! [Multip, IMD3, 35-39 yrs, white]*

*Eventually I rang back to say I want to come in to be checked over only to be told "well you will probably end up going home anyway". [...] Would like to point out when arrived at hospital when I was checked over I was 9 cm. [Primip, IMD1, 25-29 yrs, white]*

**Not being allowed...**

Women reported not being allowed to come into hospital, not being allowed to stay, and in a few cases, having to beg for a vaginal examination. This made them more anxious as they felt that hospital was a safer place than home:

*Labour was slow so kept getting told to stay at home - that was very distressing and made me more anxious. [Primip, IMD3, 25-29 yrs, BME]*

*Crying out in pain and begging for midwife to check over/do internal to see how dilated.*

*Only then discovered 6/7 cm dilated and wheeled in wheelchair to labour ward. [Primip, IMD1, 25-29 yrs, white]*

In addition, some women reported that staff did not take account of their travel time, necessitating several lengthy and uncomfortable journeys:



1  
2  
3 *My waters broke 11.30pm - phoned hospital told to go in [...] Got told to go home as it was my 1st*  
4  
5 *baby - told to look out for contractions [...] by 7am I was in pain - phoned hospital told to go back*  
6  
7 *in - my 3rd 40 min journey - when I got to hospital - got told I was in the very early stages of*  
8  
9 *labour - not checked at all and got told to go home [...] Got home - another 40 min journey.*  
10  
11 *Started bleeding was being sick and in pain - phone hospital again and got told to go back AGAIN*  
12  
13 *[...] When I got to the hospital, I couldn't walk [...] Got to the labour ward on the 6th floor - told I*  
14  
15 *was fully dilated and the head was there [...] [Primip, IMD3, 35-39 yrs, white]*

16  
17  
18  
19 The above quote also illustrates a sub-theme of 'Not being checked' which was reported by several  
20  
21 women and was associated with delay in diagnosis of active labour and inappropriate management:

22  
23 *[...] labour started naturally at 1am. I informed the midwife at 5am but she refused to believe I*  
24  
25 *was in established labour. By the time I convinced her to check me at 7:45am, I was 9cm dilated*  
26  
27 *and baby was born within next ten mins. The lesson to be learnt is that some midwives will only*  
28  
29 *take you seriously if you are screaming in pain. [Multip, IMD4, 25-29 yrs, ethnicity missing]*

### 30 31 32 33 **Previous labours**

34  
35 Some midwives were reportedly unwilling to take account of parity in assessing whether a woman  
36  
37 was in early or active labour. Primiparous women clearly need more support and reassurance:

38  
39  
40 *Being my first pregnancy when I went into labour I was unsure. [...] I feel for first time mums - a*  
41  
42 *little more understanding at the hospital that we don't know what our bodies are doing would*  
43  
44 *help. [Primip, IMD2, 30-34 yrs, white]*

45  
46  
47 Multiparous women who had experienced labour before are likely to recognise the different stages  
48  
49 and sometimes reported not being listened to. Advice to other women included "you know your  
50  
51 body" and "trust your instincts".

52  
53  
54 *[...] My husband was told to leave and I was transferred to a ward. I was still having contractions*  
55  
56 *but told it would be ages until active labour. I explained my contractions were always irregular*  
57  
58  
59  
60

1  
2  
3 *but once pain increased the 2nd stage would be very quick [...] My husband was still told to go*  
4 *home. After he left I started having more painful contractions and called for the midwife. She*  
5 *checked me and thought active labour had started and went to call the labour ward. I had to call*  
6 *her back 5 minutes later as I needed to start pushing. I called my husband but he did not get there*  
7 *in time. It was a very scary experience as there was no equipment in the room to deliver the baby*  
8 *(as it was a normal antenatal ward) [...] [Multip, IMD3, 30-34 yrs, BME]*

9  
10  
11  
12  
13  
14  
15  
16  
17 *When I went into labour with my 3rd child I called the labour ward and wanted to come into*  
18 *hospital but they wouldn't let me. I didn't feel like she was listening to me even though I said I*  
19 *labour quickly. By the time I got to hospital I was in too much pain to have IV's [for Group B strep].*  
20 *If I'd gone into hospital when I wanted to then I would have had pain relief sooner and would have*  
21 *received the antibiotics. [Multip, IMD5, 35-39 yrs, white]*

#### 22 23 24 25 26 27 28 **Perceived consequences for women**

29  
30 Many of the women who had felt let down by staff in early labour, having to stay at home when they  
31 wanted to be in hospital, went on to report a failure to get appropriate pain relief and medication  
32 (as in the previous quote), a rushed, sometimes operative, delivery, feelings of shock and delayed  
33 attachment to their baby:  
34  
35  
36  
37

38  
39 *My labour was a bit stop-start and the unit suggested I didn't come in until the contractions were*  
40 *every 3 mins and at least 1 minute in duration. I don't feel this was the right advice for me and*  
41 *regret not going to get checked out as I think if I had gone in after my contractions were about 5*  
42 *minutes, I may have had a natural birth rather than C-section. However, the care I received was*  
43 *excellent other than that. [Primip, IMD2, 25-29 yrs, white]*

44  
45  
46  
47  
48  
49  
50  
51 *[...] My baby's head was already out by the time the midwife arrived in the room. I had to have my*  
52 *baby standing up as there was not time to get on the bed. I was in complete shock when my baby*  
53 *was born due to this and I did not feel the immediate rush of love for my baby because I was in*  
54 *too much shock and pain. [Multip, IMD3, 30-34 yrs, white]*

1  
2  
3 Some women ascribed their poor experiences to staff shortages or the facilities being particularly  
4  
5 busy:

6  
7  
8 *They [staff] were horribly rushed, kept saying things would happen that didn't happen, didn't pass*  
9  
10 *information between colleagues, and didn't give us consistent information. It was clear that they*  
11  
12 *were horribly overworked and were dealing with people in more priority than me. I feel confident*  
13  
14 *that I would have got more attention had I been higher priority (I wasn't at risk) but it was an*  
15  
16 *unpleasant experience where I felt powerless and confused for a lot of the time ... [Primip, IMD2,*  
17  
18 *30-34 yrs, white]*  
19

20  
21 All the free-text comments relating to early labour were negative so it was not possible to estimate  
22  
23 the association between qualitative comments and the quantitative measure of satisfaction with  
24  
25 care during labour and birth. However, among women who wrote a free-text comment relating to  
26  
27 early labour, only 32.1% were very satisfied with their care at this time compared to 62.8% in the  
28  
29 whole sample. The proportions who were very dissatisfied were 7.1% and 2.3% respectively.

30  
31 Similarly, whilst 84% of women overall felt that they received appropriate advice when they phoned  
32  
33 a midwife in early labour, only 36% of women who wrote free-text comments considered the advice  
34  
35 appropriate.  
36  
37

## 38 39 **DISCUSSION**

40  
41 The findings of this study suggest that there is considerable variation in women's experience of early  
42  
43 labour by sociodemographic characteristics. Although the differences by parity are to be expected,  
44  
45 the significantly increased worry among BME women is more surprising. However, it confirms the  
46  
47 findings of a previous study which found that ethnic minority women were more likely to report high  
48  
49 levels of worry about almost all aspects of birth, irrespective of parity and residence in an area of  
50  
51 deprivation.(32) After adjusting for parity, ethnicity and IMD, women aged 20-24 years were also  
52  
53 more likely to be worried about not knowing when labour would start and, again, this is consistent  
54  
55 with earlier research.(22) Women in this age group were also significantly less likely to feel that they  
56  
57  
58  
59  
60

1  
2  
3 received appropriate advice when they phoned a midwife or the hospital. This may reflect a  
4  
5 perception in this group that they are viewed as problematic and immature by health care  
6  
7 professionals.(33)  
8  
9

10 Primiparous women who were not able to attend NHS antenatal classes, either because they were  
11  
12 not offered or because they were booked up, were significantly more likely to be very worried about  
13  
14 not knowing when labour would start. This finding persisted after adjustment for sociodemographic  
15  
16 characteristics. This is consistent with the findings of a Danish randomised controlled trial which  
17  
18 found that antenatal education in small groups increased women's confidence in their ability to cope  
19  
20 at home during labour.(34) However, the women who were unable to access NHS antenatal  
21  
22 education in the current study were also significantly less likely to have planned their pregnancy or  
23  
24 to have booked before 10 weeks. Thus, they may have been more worried generally.  
25  
26  
27

28 The free-text comments relating to women's experience of early labour were entirely negative. This  
29  
30 partly reflects the propensity for respondents to write additional comments when they have an issue  
31  
32 about which they would like to comment or complain.(29) To put it into context, over three-quarters  
33  
34 of women contacting a midwife or hospital at the start of labour reported receiving appropriate  
35  
36 advice but the corresponding proportion for women who wrote free-text responses on this topic  
37  
38 was just over a third. The main themes related to women's perceptions of staff assumptions and  
39  
40 attitudes, and not being allowed to come to hospital or stay, and these resonate strongly with earlier  
41  
42 studies.(2, 16-18, 20, 35) In particular, the study by Spiby et al (2014)(20) used focus groups to  
43  
44 understand the views of UK midwives dealing with women in early labour. They found that some  
45  
46 midwives held negative perceptions and stereotypes of women and labelled them accordingly.  
47  
48 Studies which analysed this subject from women's perspectives underscored the importance to  
49  
50 women of arriving at the hospital at the 'right time', the distress associated with being sent home,  
51  
52 and the impact of having a caring or uncaring midwife, of being believed.(2, 16) The neglect felt by  
53  
54  
55  
56  
57  
58  
59  
60

1  
2  
3 some women at this time echoes the results of a study of women's experience of the early phase of  
4  
5 induction of labour.(36)  
6  
7

8 The other two themes that arose in this study related to parity and the perceived consequences for  
9  
10 women of poor early labour care. Parity is not mentioned in the literature although some studies  
11  
12 only included primiparous women.(12, 14, 17, 18) In this study, the issues facing primiparous and  
13  
14 multiparous women differed: primiparous women wanted more support and reassurance whereas  
15  
16 multiparous women, having already experienced labour, remembered how it felt and were  
17  
18 sometimes angry at not being believed. Some women perceived negative consequences resulting  
19  
20 from inaccurate diagnosis of labour. These included a lack of time for pain relief, medication and a  
21  
22 perception of delayed attachment to their baby, also women who thought that an operative delivery  
23  
24 may have been avoided had early labour been better managed. Although this latter outcome has  
25  
26 been demonstrated to result from admission in early labour,(1, 2) no qualitative studies have  
27  
28 reported on this.  
29  
30

31  
32 A strength of this study is that it was based on a large random sample of births in England and uses  
33  
34 both quantitative and qualitative data from the same primiparous and multiparous women.  
35

36 Limitations include the 47% response rate with under-representation of young women, those born  
37  
38 outside the UK, and women resident in deprived areas.(27) However, 16% of respondents were  
39  
40 BME, 17% left full-time education aged 16 years or less, 20% were resident in the most deprived  
41  
42 quintile, and 13% did not have a partner at the time of the survey. Similarly, the free-text comments  
43  
44 were disproportionately from primiparous, more educated women, and those resident in the least  
45  
46 deprived quintile. However, qualitative research aims to be transferable rather than generalisable  
47  
48 and the characteristics of women who wrote free-text comments are shown in Table 6. Moreover,  
49  
50 the findings are consistent with those of other studies and the numbers of women, even in minority  
51  
52 groups, are substantial. A further limitation of the quantitative data is that they are entirely based  
53  
54  
55  
56  
57  
58  
59  
60

1  
2  
3 on women's perception and recall of events, which may be inaccurate. However, recall of salient  
4  
5 events in childbirth is generally good.(37, 38)  
6  
7

## 8 **Conclusions and implications for practice**

9

10 These findings reinforce those of other studies stressing the importance of providing reassurance to  
11 women in early labour, taking care that women do not feel neglected or dismissed. In particular,  
12 young primiparous women and those from minority ethnic groups report greater worry about  
13 aspects of early labour than other women and require additional reassurance. Whilst most women  
14 who are not contracting strongly and regularly can be reassured that they can safely stay at home,  
15 some women labour very rapidly. The Norwegian midwives cited in the study by Eri et al (2011)(19)  
16 recommended that women come into hospital to be assessed and to see how their labour  
17 progresses. If they are not in active labour, they can then decide for themselves that they would be  
18 more comfortable at home and feel confident in going home.(19) A standalone triage unit for  
19 women in early labour, separate from the labour ward, would not be influenced by the workload  
20 there and could help women to have a more positive experience of early labour. This model may  
21 require additional resources to set up, but if it helps women to come into hospital in active labour, it  
22 may save resources overall.  
23  
24  
25  
26  
27  
28  
29  
30  
31  
32  
33  
34  
35  
36  
37  
38

39 Antenatal education may have a role in improving women's and partners' knowledge and confidence  
40 in coping at home but a recent systematic review reported a lack of good evidence as to its  
41 effectiveness in promoting good obstetric and psychosocial outcomes more generally.(39) The  
42 maternity services should consider whether women's information needs are being met.  
43  
44  
45  
46  
47

48 In summary, most women were not particularly worried about early labour and most of those who  
49 contacted a midwife at this time felt that they received appropriate advice. However, some women  
50 clearly felt that their care at this time had been poor suggesting that this is an area where  
51 improvements could be made.  
52  
53  
54  
55  
56  
57  
58  
59  
60

## ACKNOWLEDGEMENTS

Our particular thanks go to the women who completed the surveys and to Mark Gautrey and staff at the Office for National Statistics who were responsible for drawing the sample and managing the mailings. The Office for National Statistics provided data for the sampling frame but bear no responsibility for its analysis and interpretation.

## COMPETING INTERESTS

The authors declare that they have no competing interests.

## FUNDING

This paper reports on an independent study which is funded by the Policy Research Programme in the Department of Health. The views expressed are not necessarily those of the Department. The Department of Health was not involved in any aspect of the study.

## AUTHORS' CONTRIBUTIONS

JH initiated this study, conducted the analyses and drafted the manuscript. MR was the principal investigator for women's surveys and helped direct the analysis. Both authors revised the manuscript.

## DATA SHARING STATEMENT

Further analyses of these data are planned so data will not be shared until these are completed.

## REFERENCES

1. National Institute for Health and Care Excellence. Intrapartum care for healthy women and babies 2014 [Available from: [nice.org.uk/guidance/cg190](http://nice.org.uk/guidance/cg190)].
2. Hanada N, Matsuki M, Ota E, Mori R. Psychosocial and educational interventions in latent phase or early labour for improving birth outcomes (Protocol). *Cochrane Db Syst Rev*. 2015(2).
3. Alehagen S, Wijma B, Lundberg U, Wijma K. Fear, pain and stress hormones during childbirth. *J Psychosom Obstet Gynaecol*. 2005;26(3):153-65.
4. Hemminki E, Simukka R. The timing of hospital admission and progress of labour. *Eur J Obstet Gynecol Reprod Biol*. 1986;22(1-2):85-94.
5. Holmes P, Oppenheimer LW, Wen SW. The relationship between cervical dilatation at initial presentation in labour and subsequent intervention. *BJOG*. 2001;108(11):1120-4.
6. Klein MC, Kelly A, Kaczorowski J, Grzybowski S. The effect of family physician timing of maternal admission on procedures in labour and maternal and infant morbidity. *J Obstet Gynaecol Can*. 2004;26(7):641-5.
7. Bailit JL, Dierker L, Blanchard MH, Mercer BM. Outcomes of women presenting in active versus latent phase of spontaneous labor. *Obstet Gynecol*. 2005;105(1):77-9.
8. Petersen A, Penz SM, Gross MM. Women's perception of the onset of labour and epidural analgesia: a prospective study. *Midwifery*. 2013;29(4):284-93.
9. Rahnama P, Ziaei S, Faghihzadeh S. Impact of early admission in labor on method of delivery. *Int J Gynaecol Obstet*. 2006;92(3):217-20.
10. Friedman E. *Labor: clinical evaluation and management*, 2nd ed. New York: Appleton-Century Crofts; 1978.
11. Cheyne H, Dowding DW, Hundley V. Making the diagnosis of labour: midwives' diagnostic judgement and management decisions. *J Adv Nurs*. 2006;53(6):625-35.
12. Janssen PA, Desmarais SL. Women's experience with early labour management at home vs. in hospital: a randomised controlled trial. *Midwifery*. 2013;29(3):190-4.
13. Hodnett ED, Stremler R, Willan AR, Weston JA, Lowe NK, Simpson KR, et al. Effect on birth outcomes of a formalised approach to care in hospital labour assessment units: international, randomised controlled trial. *BMJ*. 2008;337:a1021.
14. Cheyne H, Hundley V, Dowding D, Bland JM, McNamee P, Greer I, et al. Effects of algorithm for diagnosis of active labour: cluster randomised trial. *BMJ*. 2008;337:a2396.
15. Carlsson IM, Hallberg LR, Odberg Pettersson K. Swedish women's experiences of seeking care and being admitted during the latent phase of labour: a grounded theory study. *Midwifery*. 2009;25(2):172-80.
16. Eri TS, Bondas T, Gross MM, Janssen P, Green JM. A balancing act in an unknown territory: a metasynthesis of first-time mothers' experiences in early labour. *Midwifery*. 2015;31(3):e58-67.
17. Green JM, Spiby H, Hucknall C, Richardson Foster H. Converting policy into care: women's satisfaction with the early labour telephone component of the All Wales Clinical Pathway for Normal Labour. *J Adv Nurs*. 2012;68(10):2218-28.
18. Cappelletti G, Nespoli A, Fumagalli S, Borrelli SE. First-time mothers' experiences of early labour in Italian maternity care services. *Midwifery*. 2016;34:198-204.
19. Eri TS, Blystad A, Gjengedal E, Blaaka G. 'Stay home for as long as possible': midwives' priorities and strategies in communicating with first-time mothers in early labour. *Midwifery*. 2011;27(6):e286-92.
20. Spiby H, Walsh D, Green J, Crompton A, Bugg G. Midwives' beliefs and concerns about telephone conversations with women in early labour. *Midwifery*. 2014;30(9):1036-42.
21. Henderson J, Gao H, Redshaw M. Experiencing maternity care: the care received and perceptions of women from different ethnic groups. *BMC Pregnancy Childbirth*. 2013;13:196.
22. Henderson J, Redshaw M. Worries About Labor and Birth: A Population-Based Study of Outcomes for Young Primiparous Women. *Birth*. 2016;43(2):151-8.



- 1  
2  
3 23. Redshaw M, Henderson J. Who is actually asked about their mental health in pregnancy and  
4 the postnatal period? Findings from a national survey. *BMC Psychiatry*. 2016;16(1):322.
- 5 24. Lindquist A, Kurinczuk JJ, Redshaw M, Knight M. Experiences, utilisation and outcomes of  
6 maternity care in England among women from different socio-economic groups: findings from the  
7 2010 National Maternity Survey. *BJOG*. 2015;122(12):1610-7.
- 8 25. Mander S, Miller YD. Perceived safety, quality and cultural competency of maternity care for  
9 culturally and linguistically diverse women in Queensland. *J Racial Ethn Health Disparities*.  
10 2016;3(1):83-98.
- 11 26. Zadoroznyj M, Brodribb WE, Young K, Kruske S, Miller YD. 'I really needed help': What  
12 mothers say about their post-birth care in Queensland, Australia. *Women Birth*. 2015;28(3):246-51.
- 13 27. Redshaw M, Henderson J. Safely delivered: a national survey of women's experience of  
14 maternity care 2014. Oxford; 2015. Available at: <https://www.npeu.ox.ac.uk/reports/807-safely-delivered?highlight=YTo0OntpOjA7czo2OiJzYWZlbHkiO2k6MTtzOjk6ImRlbGl2ZXJlZCI7aToyO3M6MTA6lidkZWxpdmVyZWQiO2k6MztzOjE2OiJzYWZlbHkgZGVsaXZlcmVkljt9>
- 15 28. Redshaw M, Martin C, Rowe R, Hockley C. The Oxford Worries about Labour Scale: women's  
16 experience and measurement characteristics of a measure of maternal concern about labour and  
17 birth. *Psychol Health Med*. 2009;14(3):354-66.
- 18 29. Garcia J, Evans J, Redshaw M. "Is there anything else you would like to tell us?" -  
19 methodological issues in the use of free-text comments from postal surveys. *Qual Quant*.  
20 2004;38:113-25.
- 21 30. Golafshani N. Understanding reliability and validity in qualitative research. *Qual Rep*.  
22 2003;8(4):597-607.
- 23 31. Henderson J, Redshaw M. Change over time in women's views and experiences of maternity  
24 care in England, 1995-2014: A comparison using survey data. *Midwifery*. 2017;44:35-40.
- 25 32. Redshaw M, Heikkila K. Ethnic differences in women's worries about labour and birth. *Ethn*  
26 *Health*. 2011;16(3):213-23.
- 27 33. Redshaw M, Miller YD, Hennegan J. Young women's experiences as consumers of maternity  
28 care in Queensland. *Birth*. 2014;41(1):56-63.
- 29 34. Brixval CS, Axelsen SF, Thygesen LC, Due P, Koushede V. Antenatal education in small classes  
30 may increase childbirth self-efficacy: Results from a Danish randomised trial. *Sex Reprod Healthc*.  
31 2016;10:32-4.
- 32 35. Marowitz A. Caring for women in early labor: can we delay admission and meet women's  
33 needs? *J Midwifery Womens Health*. 2014;59(6):645-50.
- 34 36. Henderson J, Redshaw M. Women's experience of induction of labor: a mixed methods  
35 study. *Acta Obstet Gynecol Scand*. 2013;92(10):1159-67.
- 36 37. Quigley MA, Hockley C, Davidson LL. Agreement between hospital records and maternal  
37 recall of mode of delivery: evidence from 12 391 deliveries in the UK Millennium Cohort Study.  
38 *BJOG*. 2007;114(2):195-200.
- 39 38. Bat-Erdene U, Metcalfe A, McDonald SW, Tough SC. Validation of Canadian mothers' recall  
40 of events in labour and delivery with electronic health records. *BMC Pregnancy Childbirth*. 2013;13  
41 Suppl 1:S3.
- 42 39. Brixval CS, Axelsen SF, Laudemoller SG, Andersen SK, Due P, Koushede V. The effect of  
43 antenatal education in small classes on obstetric and psycho-social outcomes - a systematic review.  
44 *Syst Rev*. 2015;4:20.
- 45  
46  
47  
48  
49  
50  
51  
52  
53  
54  
55  
56  
57  
58  
59  
60

1  
2  
3  
4  
5  
6  
7  
8  
9  
10  
11  
12  
13  
14  
15  
16  
17  
18  
19  
20  
21  
22  
23  
24  
25  
26  
27  
28  
29  
30  
31  
32  
33  
34  
35  
36  
37  
38  
39  
40  
41  
42  
43  
44  
45  
46  
47  
48  
49  
50  
51  
52  
53  
54  
55  
56  
57  
58  
59  
60

Figure 1 – Numbers and proportions of women contacting midwife or hospital at the start of labour and resulting care (of the 3099 women who had neither induction of labour nor a planned caesarean section before the start of labour)

For peer review only

Figure 1 – Numbers and proportions of women contacting midwife or hospital at the start of labour and resulting care (of the 3099 women who had neither induction of labour nor a planned caesarean section before the start of labour)

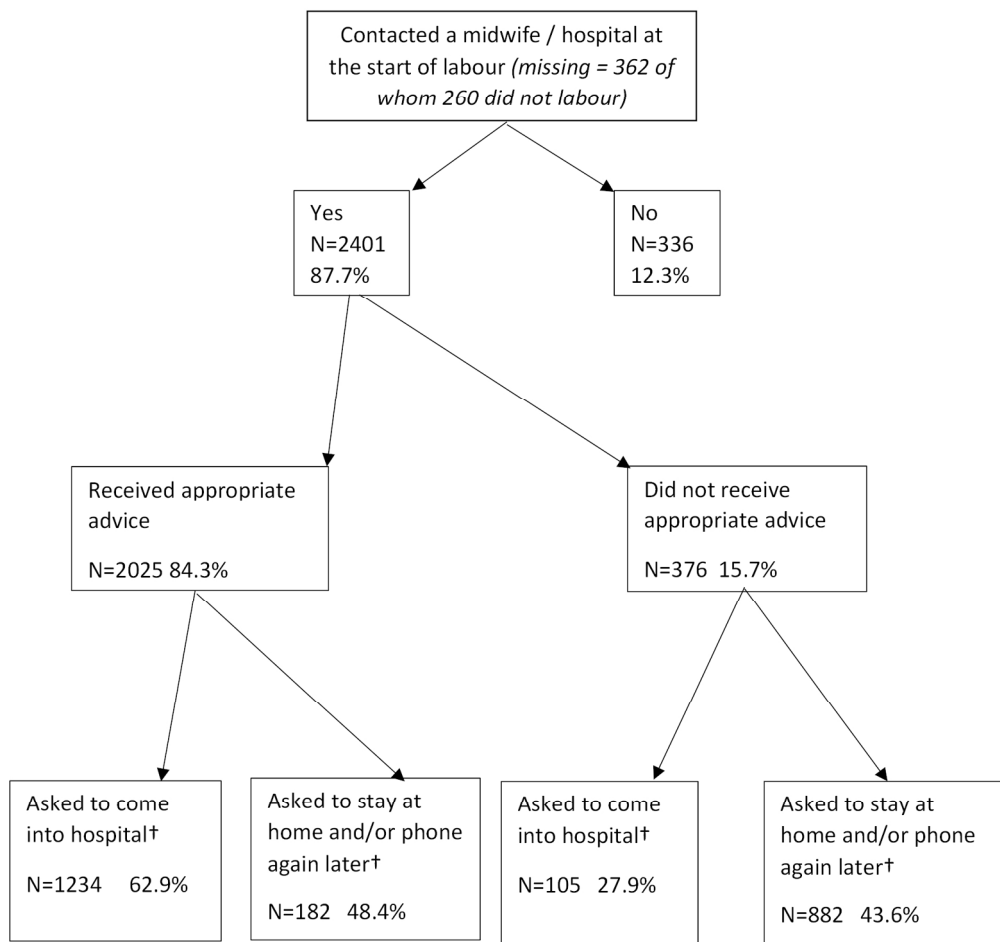

† Not exclusive categories

Figure 1 – Numbers and proportions of women contacting midwife or hospital at the start of labour and resulting care (of the 3099 women who had neither induction of labour nor a planned caesarean section before the start of labour)

163x180mm (300 x 300 DPI)

## Supplementary data on antenatal education

|                                                  | Offered AN classes |      | Attended NHS classes |               |                 |            | Paid for AN classes |      |     |      |     |      |
|--------------------------------------------------|--------------------|------|----------------------|---------------|-----------------|------------|---------------------|------|-----|------|-----|------|
|                                                  | N                  | %    | Yes                  | No, booked up | No, not offered | Not wanted | No.                 | %    | N   | %    |     |      |
| <b>Maternal age (years)</b>                      |                    |      |                      |               |                 |            |                     |      |     |      |     |      |
| <20                                              | 57                 | 73.1 | 20                   | 25.6          | 4               | 5.1        | 14                  | 17.9 | 28  | 35.9 | 0   | 0.0  |
| 20-24                                            | 240                | 68.0 | 97                   | 28.0          | 13              | 3.8        | 75                  | 21.7 | 115 | 33.2 | 11  | 3.2  |
| 25-29                                            | 586                | 70.3 | 289                  | 35.1          | 15              | 1.8        | 165                 | 20.0 | 235 | 28.6 | 82  | 9.9  |
| 30-34                                            | 700                | 64.0 | 314                  | 29.4          | 19              | 1.8        | 266                 | 24.9 | 315 | 29.5 | 200 | 18.4 |
| 35-39                                            | 342                | 59.6 | 144                  | 25.9          | 10              | 1.8        | 149                 | 26.8 | 163 | 29.3 | 106 | 18.5 |
| 40+                                              | 61                 | 52.1 | 23                   | 21.3          | 2               | 1.9        | 35                  | 32.4 | 30  | 27.8 | 19  | 16.4 |
| Total                                            | 1986               | 65.1 | 887                  | 29.8          | 63              | 2.1        | 704                 | 23.6 | 886 | 29.7 | 418 | 13.8 |
|                                                  |                    | ***  |                      |               |                 |            |                     |      | **  |      |     | ***  |
| <b>Parity</b>                                    |                    |      |                      |               |                 |            |                     |      |     |      |     |      |
| Primiparous                                      | 1218               | 83.5 | 725                  | 50.0          | 43              | 3.0        | 158                 | 10.9 | 286 | 19.7 | 336 | 23.1 |
| Multiparous                                      | 717                | 47.4 | 130                  | 9.0           | 18              | 1.2        | 531                 | 36.6 | 582 | 40.1 | 72  | 4.8  |
| Total                                            | 1935               | 65.2 | 855                  | 29.5          | 61              | 2.1        | 689                 | 23.7 | 868 | 29.9 | 408 | 13.8 |
|                                                  |                    | ***  |                      |               |                 |            |                     |      | *** |      |     | ***  |
| <b>Index of multiple deprivation (quintiles)</b> |                    |      |                      |               |                 |            |                     |      |     |      |     |      |
| 1 (least deprived)                               | 393                | 66.2 | 176                  | 30.0          | 10              | 1.7        | 137                 | 23.4 | 160 | 27.3 | 129 | 21.9 |
| 2                                                | 421                | 70.6 | 190                  | 33.0          | 14              | 2.4        | 113                 | 19.6 | 165 | 28.6 | 112 | 19.0 |
| 3                                                | 408                | 65.6 | 202                  | 33.3          | 13              | 2.1        | 149                 | 24.5 | 161 | 26.5 | 86  | 14.0 |
| 4                                                | 410                | 63.2 | 181                  | 28.7          | 12              | 1.9        | 154                 | 24.4 | 202 | 32.0 | 63  | 9.7  |
| 5 (most deprived)                                | 353                | 59.9 | 138                  | 23.8          | 14              | 2.4        | 151                 | 26.0 | 198 | 34.1 | 28  | 4.8  |
| Total                                            | 1985               | 65.1 | 887                  | 29.8          | 63              | 2.1        | 704                 | 23.6 | 886 | 29.7 | 418 | 13.8 |
|                                                  |                    | **   |                      |               |                 |            |                     |      | **  |      |     | ***  |
| <b>Black or minority ethnic group</b>            |                    |      |                      |               |                 |            |                     |      |     |      |     |      |
| No                                               | 1656               | 66.8 | 736                  | 30.5          | 46              | 1.9        | 558                 | 23.1 | 732 | 30.3 | 366 | 14.9 |
| Yes                                              | 282                | 57.9 | 125                  | 25.9          | 14              | 2.9        | 131                 | 27.1 | 130 | 26.9 | 45  | 9.3  |

|       |      |             |     |      |    |     |     |      |     |           |     |            |
|-------|------|-------------|-----|------|----|-----|-----|------|-----|-----------|-----|------------|
| Total | 1938 | 65.4<br>*** | 861 | 29.7 | 60 | 2.1 | 689 | 23.8 | 862 | 29.7<br>* | 411 | 14.0<br>** |
|-------|------|-------------|-----|------|----|-----|-----|------|-----|-----------|-----|------------|

Missing values: Offered AN classes 48; Attended AN classes 118; Paid for private classes 69

### Association between worry about aspects of early labour and attendance at antenatal classes (Primips only)

|                                                                  | Attended AN classes |      | Classes all booked up or not offered |      | Did not wish to attend or did not attend for other reason |      |
|------------------------------------------------------------------|---------------------|------|--------------------------------------|------|-----------------------------------------------------------|------|
|                                                                  | No.                 | %    | No.                                  | %    | No.                                                       | %    |
| Very worried about not knowing when labour would start (p=0.002) | 136                 | 12.4 | 57                                   | 19.8 | 90                                                        | 12.3 |
| Very worried about getting to hospital in time (NS)              | 94                  | 8.5  | 35                                   | 12.3 | 68                                                        | 9.3  |

**Logistic regression** on feeling very worried about not knowing when labour would start adjusted for age, IMD, and ethnicity

|                                                           | OR (95% CI)       |
|-----------------------------------------------------------|-------------------|
| Attended AN classes                                       | 1                 |
| Classes all booked up or not offered                      | 1.58 (1.10, 2.25) |
| Did not wish to attend or did not attend for other reason | 0.94 (0.70, 1.26) |

## STROBE Statement—checklist of items that should be included in reports of observational studies

|                              | Item No | Recommendation                                                                                                                                                                                                                                                                                                                                                                                                                                                         | Page |
|------------------------------|---------|------------------------------------------------------------------------------------------------------------------------------------------------------------------------------------------------------------------------------------------------------------------------------------------------------------------------------------------------------------------------------------------------------------------------------------------------------------------------|------|
| <b>Title and abstract</b>    | 1       | (a) Indicate the study's design with a commonly used term in the title or the abstract                                                                                                                                                                                                                                                                                                                                                                                 | 1    |
|                              |         | (b) Provide in the abstract an informative and balanced summary of what was done and what was found                                                                                                                                                                                                                                                                                                                                                                    | 2    |
| <b>Introduction</b>          |         |                                                                                                                                                                                                                                                                                                                                                                                                                                                                        |      |
| Background/rationale         | 2       | Explain the scientific background and rationale for the investigation being reported                                                                                                                                                                                                                                                                                                                                                                                   | 4-6  |
| Objectives                   | 3       | State specific objectives, including any prespecified hypotheses                                                                                                                                                                                                                                                                                                                                                                                                       | 6    |
| <b>Methods</b>               |         |                                                                                                                                                                                                                                                                                                                                                                                                                                                                        |      |
| Study design                 | 4       | Present key elements of study design early in the paper                                                                                                                                                                                                                                                                                                                                                                                                                | 6    |
| Setting                      | 5       | Describe the setting, locations, and relevant dates, including periods of recruitment, exposure, follow-up, and data collection                                                                                                                                                                                                                                                                                                                                        | 6    |
| Participants                 | 6       | (a) <i>Cohort study</i> —Give the eligibility criteria, and the sources and methods of selection of participants. Describe methods of follow-up<br><i>Case-control study</i> —Give the eligibility criteria, and the sources and methods of case ascertainment and control selection. Give the rationale for the choice of cases and controls<br><i>Cross-sectional study</i> —Give the eligibility criteria, and the sources and methods of selection of participants | 6    |
|                              |         | (b) <i>Cohort study</i> —For matched studies, give matching criteria and number of exposed and unexposed<br><i>Case-control study</i> —For matched studies, give matching criteria and the number of controls per case                                                                                                                                                                                                                                                 |      |
| Variables                    | 7       | Clearly define all outcomes, exposures, predictors, potential confounders, and effect modifiers. Give diagnostic criteria, if applicable                                                                                                                                                                                                                                                                                                                               | 6-7  |
| Data sources/<br>measurement | 8*      | For each variable of interest, give sources of data and details of methods of assessment (measurement). Describe comparability of assessment methods if there is more than one group                                                                                                                                                                                                                                                                                   | 6-7  |
| Bias                         | 9       | Describe any efforts to address potential sources of bias                                                                                                                                                                                                                                                                                                                                                                                                              | 7    |
| Study size                   | 10      | Explain how the study size was arrived at                                                                                                                                                                                                                                                                                                                                                                                                                              | 6    |
| Quantitative variables       | 11      | Explain how quantitative variables were handled in the analyses. If applicable, describe which groupings were chosen and why                                                                                                                                                                                                                                                                                                                                           | 7    |
| Statistical methods          | 12      | (a) Describe all statistical methods, including those used to control for confounding                                                                                                                                                                                                                                                                                                                                                                                  | 7    |
|                              |         | (b) Describe any methods used to examine subgroups and interactions                                                                                                                                                                                                                                                                                                                                                                                                    |      |
|                              |         | (c) Explain how missing data were addressed                                                                                                                                                                                                                                                                                                                                                                                                                            |      |
|                              |         | (d) <i>Cohort study</i> —If applicable, explain how loss to follow-up was addressed<br><i>Case-control study</i> —If applicable, explain how matching of cases and controls was addressed<br><i>Cross-sectional study</i> —If applicable, describe analytical methods taking account of sampling strategy                                                                                                                                                              |      |
|                              |         | (e) Describe any sensitivity analyses                                                                                                                                                                                                                                                                                                                                                                                                                                  |      |

Continued on next page

**Results**

|                  |     |                                                                                                                                                                                                                                                                                                                                                                                                               |                  |
|------------------|-----|---------------------------------------------------------------------------------------------------------------------------------------------------------------------------------------------------------------------------------------------------------------------------------------------------------------------------------------------------------------------------------------------------------------|------------------|
| Participants     | 13* | (a) Report numbers of individuals at each stage of study—eg numbers potentially eligible, examined for eligibility, confirmed eligible, included in the study, completing follow-up, and analysed<br>(b) Give reasons for non-participation at each stage<br>(c) Consider use of a flow diagram                                                                                                               | 7-8<br><br>Fig 1 |
| Descriptive data | 14* | (a) Give characteristics of study participants (eg demographic, clinical, social) and information on exposures and potential confounders<br>(b) Indicate number of participants with missing data for each variable of interest<br>(c) <i>Cohort study</i> —Summarise follow-up time (eg, average and total amount)                                                                                           | Tables 1-3       |
| Outcome data     | 15* | <i>Cohort study</i> —Report numbers of outcome events or summary measures over time<br><i>Case-control study</i> —Report numbers in each exposure category, or summary measures of exposure<br><i>Cross-sectional study</i> —Report numbers of outcome events or summary measures                                                                                                                             | Tables 1-3       |
| Main results     | 16  | (a) Give unadjusted estimates and, if applicable, confounder-adjusted estimates and their precision (eg, 95% confidence interval). Make clear which confounders were adjusted for and why they were included<br>(b) Report category boundaries when continuous variables were categorized<br>(c) If relevant, consider translating estimates of relative risk into absolute risk for a meaningful time period | Tables 4-5       |
| Other analyses   | 17  | Report other analyses done—eg analyses of subgroups and interactions, and sensitivity analyses                                                                                                                                                                                                                                                                                                                |                  |

**Discussion**

|                          |    |                                                                                                                                                                            |       |
|--------------------------|----|----------------------------------------------------------------------------------------------------------------------------------------------------------------------------|-------|
| Key results              | 18 | Summarise key results with reference to study objectives                                                                                                                   | 20    |
| Limitations              | 19 | Discuss limitations of the study, taking into account sources of potential bias or imprecision. Discuss both direction and magnitude of any potential bias                 | 22    |
| Interpretation           | 20 | Give a cautious overall interpretation of results considering objectives, limitations, multiplicity of analyses, results from similar studies, and other relevant evidence | 20-22 |
| Generalisability         | 21 | Discuss the generalisability (external validity) of the study results                                                                                                      | 22    |
| <b>Other information</b> |    |                                                                                                                                                                            |       |
| Funding                  | 22 | Give the source of funding and the role of the funders for the present study and, if applicable, for the original study on which the present article is based              | 23    |

\*Give information separately for cases and controls in case-control studies and, if applicable, for exposed and unexposed groups in cohort and cross-sectional studies.

**Note:** An Explanation and Elaboration article discusses each checklist item and gives methodological background and published examples of transparent reporting. The STROBE checklist is best used in conjunction with this article (freely available on the Web sites of PLoS Medicine at <http://www.plosmedicine.org/>, Annals of Internal Medicine at <http://www.annals.org/>, and Epidemiology at <http://www.epidem.com/>). Information on the STROBE Initiative is available at [www.strobe-statement.org](http://www.strobe-statement.org).
