# Supplementary material for: Sociodemographic differences in women’s experience of early labour care: a mixed methods study
Source: PubMed Central journal article supplement — BMJ Open. 2017 Jul 13;7(7):e016351. doi: 10.1136/bmjopen-2017-016351 (PMC5541638; doi:10.1136/bmjopen-2017-016351), 2017-07-13
Supplement: bmjopen-2017-016351supp001.pdf [file bmjopen-2017-016351supp001.pdf]

Supplementary data on antenatal education

|                                                  | Offered AN classes |      | Attended NHS classes |               |                 |            | Paid for AN classes |      |     |      |     |      |
|--------------------------------------------------|--------------------|------|----------------------|---------------|-----------------|------------|---------------------|------|-----|------|-----|------|
|                                                  | N                  | %    | Yes                  | No, booked up | No, not offered | Not wanted | No.                 | %    | N   | %    |     |      |
| <b>Maternal age (years)</b>                      |                    |      |                      |               |                 |            |                     |      |     |      |     |      |
| <20                                              | 57                 | 73.1 | 20                   | 25.6          | 4               | 5.1        | 14                  | 17.9 | 28  | 35.9 | 0   | 0.0  |
| 20-24                                            | 240                | 68.0 | 97                   | 28.0          | 13              | 3.8        | 75                  | 21.7 | 115 | 33.2 | 11  | 3.2  |
| 25-29                                            | 586                | 70.3 | 289                  | 35.1          | 15              | 1.8        | 165                 | 20.0 | 235 | 28.6 | 82  | 9.9  |
| 30-34                                            | 700                | 64.0 | 314                  | 29.4          | 19              | 1.8        | 266                 | 24.9 | 315 | 29.5 | 200 | 18.4 |
| 35-39                                            | 342                | 59.6 | 144                  | 25.9          | 10              | 1.8        | 149                 | 26.8 | 163 | 29.3 | 106 | 18.5 |
| 40+                                              | 61                 | 52.1 | 23                   | 21.3          | 2               | 1.9        | 35                  | 32.4 | 30  | 27.8 | 19  | 16.4 |
| Total                                            | 1986               | 65.1 | 887                  | 29.8          | 63              | 2.1        | 704                 | 23.6 | 886 | 29.7 | 418 | 13.8 |
|                                                  |                    | ***  |                      |               |                 |            |                     |      | **  |      |     | ***  |
| <b>Parity</b>                                    |                    |      |                      |               |                 |            |                     |      |     |      |     |      |
| Primiparous                                      | 1218               | 83.5 | 725                  | 50.0          | 43              | 3.0        | 158                 | 10.9 | 286 | 19.7 | 336 | 23.1 |
| Multiparous                                      | 717                | 47.4 | 130                  | 9.0           | 18              | 1.2        | 531                 | 36.6 | 582 | 40.1 | 72  | 4.8  |
| Total                                            | 1935               | 65.2 | 855                  | 29.5          | 61              | 2.1        | 689                 | 23.7 | 868 | 29.9 | 408 | 13.8 |
|                                                  |                    | ***  |                      |               |                 |            |                     |      | *** |      |     | ***  |
| <b>Index of multiple deprivation (quintiles)</b> |                    |      |                      |               |                 |            |                     |      |     |      |     |      |
| 1 (least deprived)                               | 393                | 66.2 | 176                  | 30.0          | 10              | 1.7        | 137                 | 23.4 | 160 | 27.3 | 129 | 21.9 |
| 2                                                | 421                | 70.6 | 190                  | 33.0          | 14              | 2.4        | 113                 | 19.6 | 165 | 28.6 | 112 | 19.0 |
| 3                                                | 408                | 65.6 | 202                  | 33.3          | 13              | 2.1        | 149                 | 24.5 | 161 | 26.5 | 86  | 14.0 |
| 4                                                | 410                | 63.2 | 181                  | 28.7          | 12              | 1.9        | 154                 | 24.4 | 202 | 32.0 | 63  | 9.7  |
| 5 (most deprived)                                | 353                | 59.9 | 138                  | 23.8          | 14              | 2.4        | 151                 | 26.0 | 198 | 34.1 | 28  | 4.8  |
| Total                                            | 1985               | 65.1 | 887                  | 29.8          | 63              | 2.1        | 704                 | 23.6 | 886 | 29.7 | 418 | 13.8 |
|                                                  |                    | **   |                      |               |                 |            |                     |      | **  |      |     | ***  |
| <b>Black or minority ethnic group</b>            |                    |      |                      |               |                 |            |                     |      |     |      |     |      |
| No                                               | 1656               | 66.8 | 736                  | 30.5          | 46              | 1.9        | 558                 | 23.1 | 732 | 30.3 | 366 | 14.9 |
| Yes                                              | 282                | 57.9 | 125                  | 25.9          | 14              | 2.9        | 131                 | 27.1 | 130 | 26.9 | 45  | 9.3  |

|       |      |             |     |      |    |     |     |      |     |           |     |            |
|-------|------|-------------|-----|------|----|-----|-----|------|-----|-----------|-----|------------|
| Total | 1938 | 65.4<br>*** | 861 | 29.7 | 60 | 2.1 | 689 | 23.8 | 862 | 29.7<br>* | 411 | 14.0<br>** |
|-------|------|-------------|-----|------|----|-----|-----|------|-----|-----------|-----|------------|

Missing values: Offered AN classes 48; Attended AN classes 118; Paid for private classes 69

**Association between worry about aspects of early labour and attendance at antenatal classes (Primips only)**

|                                                                  | Attended AN classes |      | Classes all booked up or not offered |      | Did not wish to attend or did not attend for other reason |      |
|------------------------------------------------------------------|---------------------|------|--------------------------------------|------|-----------------------------------------------------------|------|
|                                                                  | No.                 | %    | No.                                  | %    | No.                                                       | %    |
| Very worried about not knowing when labour would start (p=0.002) | 136                 | 12.4 | 57                                   | 19.8 | 90                                                        | 12.3 |
| Very worried about getting to hospital in time (NS)              | 94                  | 8.5  | 35                                   | 12.3 | 68                                                        | 9.3  |

**Logistic regression** on feeling very worried about not knowing when labour would start adjusted for age, IMD, and ethnicity

|                                                           | <b>OR (95% CI)</b> |
|-----------------------------------------------------------|--------------------|
| Attended AN classes                                       | 1                  |
| Classes all booked up or not offered                      | 1.58 (1.10, 2.25)  |
| Did not wish to attend or did not attend for other reason | 0.94 (0.70, 1.26)  |
